# Supplementary material for: Integrated analyses of growth differentiation factor-15 concentration and cardiometabolic diseases in humans
Source: eLife journal article supplement (doi:10.7554/elife.76272), 2022-08-02
Supplement: supp [file elife_poa_e76272_Supplementary_file_3.xlsx]

## Sheet: Table S3a
Supplementary Table S3a. Significant (p-value < 5x10-8) genome-wide association study for FINRISK
Chr	SNP	Position	EA/OA	MAF	Beta	p-value
19	rs16982345	18500722	A/G	0.27	-0.34	4.63x10-83
19	rs1058587	18499422	G/C	0.27	-0.34	5.51x10-83
19	rs45543339	18503194	T/C	0.26	-0.34	1.26x10-79
19	rs75347775	18495908	A/G	0.25	-0.33	4.90x10-76
19	rs58835482	18493064	T/TGGGGGCACCCTGA	0.25	-0.33	5.98x10-76
19	rs139242800	18492574	T/C	0.26	-0.33	7.54x10-76
19	rs117110356	18494944	A/T	0.25	-0.33	1.92x10-75
19	rs17725099	18482358	A/G	0.25	-0.33	5.30x10-74
19	rs1054221	18499858	C/T	0.07	0.48	1.12x10-54
19	rs1054564	18499815	C/G	0.07	0.48	1.21x10-54
19	rs1227734	18501034	T/C	0.07	0.48	1.31x10-54
19	rs1227731	18497903	A/G	0.07	0.48	1.92x10-54
19	rs62122430	18495510	T/A	0.07	0.48	1.92x10-54
19	rs1043063	18480171	T/C	0.38	-0.25	2.53x10-54
19	rs34345957	18503167	T/TG	0.07	0.48	3.33x10-54
19	rs35673587	18490927	T/A	0.08	0.44	8.26x10-51
19	rs8105118	18489313	C/T	0.08	0.44	2.00x10-50
19	rs74180880	18484080	G/A	0.07	0.44	1.42x10-46
19	rs35911336	18481825	G/A	0.07	0.44	2.37x10-46
19	rs62122399	18481945	G/A	0.07	0.43	4.86x10-46
19	rs12710316	18487541	T/C	0.07	0.41	6.60x10-40
19	rs35319012	18478389	A/T	0.07	0.41	2.22x10-36
19	rs3195944	18476711	G/A	0.07	0.41	2.49x10-36
19	rs12462034	18475226	C/T	0.24	-0.21	3.17x10-30
19	rs1059369	18497141	A/T	0.32	0.18	8.24x10-28
19	rs1804826	18499238	T/G	0.32	0.18	1.20x10-27
19	rs4808795	18501035	A/G	0.32	0.18	1.35x10-27
19	rs12461382	18502075	T/C	0.32	0.18	1.93x10-27
19	rs73011458	18503812	G/A	0.33	0.17	4.05x10-25
19	rs4808790	18486987	C/G	0.3	0.17	4.62x10-24
19	rs4808791	18491205	A/G	0.3	0.17	5.06x10-24
19	rs145536188	18502282	G/A	0.09	-0.28	1.02x10-22
19	rs7226	18480609	T/C	0.3	0.17	1.62x10-22
19	rs8105429	18481333	G/A	0.3	0.17	1.97x10-22
19	rs2161106	18481229	C/T	0.3	0.17	2.05x10-22
19	rs112804925	18492258	T/TA	0.21	-0.19	1.02x10-21
19	rs8101804	18496107	C/T	0.2	-0.19	2.33x10-21
19	rs1059519	18497024	C/G	0.2	-0.19	2.73x10-21
19	rs12459782	18496495	C/T	0.2	-0.19	2.73x10-21
19	rs4808794	18493852	A/G	0.2	-0.19	2.99x10-21
19	rs4808793	18493837	C/G	0.2	-0.19	2.99x10-21
19	rs58734077	18494942	TA/T	0.2	-0.19	2.99x10-21
19	rs2059039	18491993	A/G	0.21	-0.18	3.01x10-21
19	rs55947999	18492781	G/A	0.21	-0.18	3.03x10-21
19	rs56033872	18492766	A/C	0.21	-0.18	3.04x10-21
19	rs3848646	18501986	G/T	0.2	-0.19	3.05x10-21
19	rs12459566	18493295	T/C	0.2	-0.19	3.07x10-21
19	rs3848647	18502078	G/A	0.2	-0.19	3.14x10-21
19	rs4328570	18502301	T/C	0.2	-0.19	3.19x10-21
19	rs3848648	18502119	T/C	0.2	-0.19	3.20x10-21
19	rs3848649	18502337	G/C	0.2	-0.19	3.20x10-21
19	rs6512266	18503093	G/T	0.2	-0.19	3.33x10-21
19	rs6512263	18502691	C/A	0.2	-0.19	3.38x10-21
19	rs6512264	18502728	A/C	0.2	-0.19	3.40x10-21
19	rs6512262	18502565	C/G	0.2	-0.19	3.41x10-21
19	rs6512265	18502835	A/G	0.2	-0.19	3.46x10-21
19	rs4808792	18491213	C/T	0.21	-0.18	4.01x10-21
19	rs113942086	18492583	A/T	0.21	-0.18	4.63x10-21
19	rs4808128	18490426	C/T	0.21	-0.18	9.63x10-21
19	rs7251610	18489734	C/T	0.21	-0.18	9.90x10-21
19	rs12610811	18479047	G/C	0.44	-14	1.22x10-18
19	rs749451	18479647	C/T	0.44	-0.14	1.36x10-18
19	rs28568614	18479019	G/A	0.43	-0.14	2.66x10-18
19	rs8107264	18485258	G/A	0.21	-0.17	2.99x10-18
19	rs4808789	18484176	G/C	0.21	-0.17	4.00x10-18
19	rs8106047	18505741	A/T	0.24	-0.16	8.02x10-17
19	rs73009419	18463680	C/T	0.08	-0.24	9.82x10-17
19	rs10424912	18489082	T/C	0.46	0.13	2.17x10-16
19	rs116986030	18504410	A/G	0.1	-0.22	6.91x10-16
19	rs79534846	18410369	A/G	0.08	-0.23	2.92x10-15
19	rs149520967	18481610	T/C	0.05	-0.28	4.42x10-15
19	rs117956919	18572355	T/C	0.1	-0.2	1.32x10-14
19	rs140067716	18625193	A/G	0.1	-0.2	1.49x10-14
19	rs4808787	18475285	G/A	0.44	0.12	1.57x10-14
19	rs13382142	18516196	T/C	0.21	-0.15	8.34x10-14
19	rs139078704	18354415	A/G	0.1	-0.2	5.57x10-13
19	rs62122428	18494090	G/A	0.02	0.37	1.08x10-12
19	rs36023459	18520129	T/TG	0.11	-0.18	1.23x10-12
19	rs199975964	18497305	AC/A	0.01	0.6	1.73x10-12
19	rs141542836	18496989	T/C	0.01	0.6	1.87x10-12
19	rs139751608	18493869	A/G	0.01	0.6	1.87x10-12
19	rs73001430	18314266	A/C	0.1	-0.19	4.05x10-12
19	rs117662356	18482568	G/C	0.01	0.61	5.99x10-12
19	rs117641542	18468501	T/C	0.01	0.62	7.77x10-12
19	rs1055150	18499784	G/C	0.41	-0.11	8.29x10-12
19	rs3787023	18498246	A/G	0.41	-0.11	8.86x10-12
19	rs146312473	18465417	A/G	0.01	0.62	9.08x10-12
19	rs11881403	18477814	A/G	0.45	-0.11	1.60x10-11
19	rs60941598	18725488	A/G	0.12	-0.16	5.98x10-11
19	rs34863656	18728254	A/G	0.12	-0.16	6.26x10-11
19	rs35611322	18729693	T/C	0.12	-0.16	6.42x10-11
19	rs80335551	18730511	A/G	0.12	-0.16	6.50x10-11
19	rs8106194	18738321	T/C	0.12	-0.16	7.56x10-11
19	rs10402779	18740208	G/T	0.12	-0.16	7.84x10-11
19	rs10401838	18740353	A/G	0.12	-0.16	7.84x10-11
19	rs7256751	18739497	T/C	0.12	-0.16	7.97x10-11
19	rs12981028	18741646	T/C	0.12	-0.16	8.55x10-11
19	rs12973817	18742238	A/G	0.12	-0.16	8.78x10-11
19	rs111627296	18743386	A/C	0.12	-0.16	9.71x10-11
19	rs12983566	18743869	T/C	0.12	-0.16	1.09x10-10
19	rs75119307	18836112	T/C	0.02	0.41	1.19x10-10
19	rs73923128	18698619	C/G	0.06	0.21	1.31x10-10
19	rs34131922	18744901	A/G	0.12	-0.16	1.66x10-10
19	rs1862646	18762882	C/T	0.14	-0.15	1.91x10-10
19	rs34071094	18756291	G/C	0.12	-0.15	4.24x10-10
19	rs3220	18781193	T/C	0.12	-0.15	6.21x10-10
19	rs117844523	18861244	C/G	0.1	-0.16	6.43x10-10
19	rs73009436	18473919	A/G	0.42	-0.1	7.19x10-10
19	rs4808788	18475308	T/C	0.4	0.1	1.07x10-9
19	rs79637643	18783342	T/C	0.12	-0.15	1.09x10-9
19	rs139562741	18507752	C/T	0.01	0.53	1.12x10-9
19	rs76936388	18893118	A/G	0.11	-0.16	1.44x10-9
19	rs1985157	18513594	C/T	0.45	-0.09	2.16x10-9
19	rs5827412	18512817	T/TAGAAAAAAA	0.46	-0.09	2.58x10-9
19	rs187037554	18562104	T/G	0.04	-0.26	2.82x10-9
19	rs542611335	18662427	T/C	0.01	0.4	3.90x10-9
19	rs146415212	18711325	T/C	0.04	0.24	4.22x10-9
19	rs72620570	18413024	T/C	0.15	-0.13	5.06x10-9
19	rs3746183	18474705	A/C	0.1	0.15	5.33x10-9
19	rs968530	19005397	C/G	0.44	9	6.49x10-9
19	rs73923175	18986645	C/T	0.11	0.15	6.67x10-9
7	rs200430819	116514073	C/T	0	1.3	8.59x10-9
7	rs200765554	116505429	A/G	0	1.3	8.70x10-9
19	rs3746263	19006666	C/G	0.44	0.09	9.82x10-9
19	rs76561599	18749085	A/G	0.05	22	1.03x10-8
19	rs6510994	18750680	T/C	0.05	0.22	1.03x10-8
19	rs13344627	18751953	A/G	0.05	0.22	1.05x10-8
19	rs8107586	18754427	G/T	0.05	0.22	1.05x10-8
19	rs77775646	18756294	A/G	0.05	0.22	1.06x10-8
19	rs35056431	18462999	G/GT	0.05	0.21	1.06x10-8
19	rs111285558	18759049	A/G	0.05	0.22	1.07x10-8
19	rs754245	18760567	A/G	0.05	0.22	1.07x10-8
19	rs118150194	18766202	C/G	0.05	0.22	1.09x10-8
19	rs78233791	18766989	A/G	0.05	0.22	1.09x10-8
19	rs34210970	18458663	T/C	0.05	0.22	1.15x10-8
19	rs149920727	18463013	T/C	0.05	0.21	1.41x10-8
19	rs188568717	18438045	T/C	0.01	0.38	1.45x10-8
19	rs12978101	18454364	A/C	0.05	0.22	1.50x10-8
19	rs74180876	18445863	C/T	0.05	0.22	1.55x10-8
19	rs59333602	18782686	A/G	0.05	0.21	1.56x10-8
19	rs59186604	18776708	T/C	0.05	0.21	1.63x10-8
19	rs73009405	18458907	G/C	0.16	0.12	1.66x10-8
19	rs2313049	19024420	G/A	0.39	0.09	1.71x10-8
19	rs138957692	19024425	TC/T	0.39	0.09	1.71x10-8
19	rs544480740	18986320	A/C	0.02	0.33	1.87x10-8
19	rs74180875	18429780	T/C	0.05	0.22	2.05x10-8
19	rs12977553	18462030	A/G	0.05	0.22	2.27x10-8
19	rs117754084	18517903	G/A	0	0.65	3.16x10-8
19	rs3859570	18510925	C/T	0.47	-0.09	3.31x10-8
19	rs117482162	18411946	C/T	0.07	-0.17	3.77x10-8
19	rs4808767	18336863	A/G	0.27	-0.1	3.81x10-8
19	rs7251661	18335977	G/A	0.27	-0.1	3.81x10-8
19	rs2074973	18333273	G/A	0.27	-0.1	4.06x10-8
19	rs4808764	18332400	C/T	0.27	-0.1	4.20x10-8
19	rs4808763	18332336	A/C	0.27	-0.1	4.21x10-8
19	rs12463335	18330608	G/A	0.27	-0.1	4.45x10-8
19	rs5827400	18331357	A/AC	0.27	-0.1	4.46x10-8
19	rs77730330	18833204	C/T	0.03	0.28	4.52x10-8
19	rs1042050	18329240	C/T	0.27	-0.1	4.64x10-8
19	rs73923135	18758169	A/C	0.11	0.14	4.70x10-8
19	rs76788927	18821951	A/C	0.03	0.27	4.92x10-8

## Sheet: Table S3b
Supplementary Table S3b. Significant (p-value < 5x10-8) genome-wide association study for INTERVAL-SomaScan
Chr	SNP	Position	Other Allele	Effect Allele	MAF	Beta	SE	p-value
19	rs45543339	18503194	C	T	0.258641	0.574525	0.0271531	2.77184e-93
19	rs16982345	18500722	G	A	0.254952	0.567163	0.0268984	1.08712e-92
19	rs1058587	18499422	C	G	0.25153	0.565408	0.0268283	1.31822e-92
19	rs117110356	18494944	T	A	0.245706	0.561883	0.0270255	2.54479e-90
19	rs75347775	18495908	G	A	0.245342	0.554092	0.0269198	1.15368e-88
19	rs58835482	18493064	TGGGGGCACCCTGA	T	0.243403	0.551411	0.0272556	6.89548e-86
19	rs139242800	18492574	C	T	0.242873	0.552946	0.0273318	6.92634e-86
19	rs17725099	18482358	G	A	0.257232	0.520762	0.0267081	3.15768e-80
19	rs111642420	18491961	AT	A	0.252386	0.53122	0.0273193	8.04204e-80
19	rs116399833	18502374	C	A	0.236496	0.540125	0.028835	1.75671e-74
19	rs34245711	18483227	C	CA	0.246115	0.49505	0.0276694	2.11848e-68
19	rs561493422	18488529	CAAAA	C	0.348553	0.435824	0.0263863	6.04364e-59
19	rs28568614	18479019	A	G	0.437617	0.383651	0.0246763	1.17177e-52
19	rs10424912	18489082	C	T	0.41161	-0.372359	0.024885	5.00214e-49
19	rs749451	18479647	T	C	0.444638	0.359326	0.0247058	1.69466e-46
19	rs12610811	18479047	C	G	0.444805	0.35492	0.0246486	1.23092e-45
19	rs11338117	18476735	CT	C	0.207194	0.436238	0.0307345	1.98302e-44
19	rs1227733	18499780	A	G	0.197137	0.431278	0.0303955	2.11767e-44
19	rs888663	18484922	G	T	0.199894	0.437549	0.0308617	2.45914e-44
19	rs11880916	18492578	A	G	0.19566	0.439387	0.0311066	4.97281e-44
19	rs1227732	18498808	T	G	0.197357	0.429198	0.0304028	5.54608e-44
19	rs62122429	18495014	A	G	0.198235	0.425044	0.0303806	2.99027e-43
19	rs1363120	18482304	C	G	0.202302	0.431817	0.0308995	3.686e-43
19	rs3746181	18477017	A	G	0.200757	0.433524	0.0310265	3.7931e-43
19	rs10408732	18477940	C	T	0.20134	0.432822	0.031056	6.10102e-43
19	rs12104325	18490284	G	A	0.420941	-0.339276	0.0250738	1.21972e-40
19	rs12460909	18483223	G	A	0.411095	-0.329166	0.0251108	2.62382e-38
19	rs8101249	18501830	A	C	0.183974	-0.38854	0.0315024	3.34626e-34
19	rs1059022	18499151	C	T	0.180922	-0.384415	0.0312847	5.77004e-34
19	rs113323060	18498563	T	TGGAAG	0.181771	-0.383523	0.0312128	5.79093e-34
19	rs1227734	18501034	C	T	0.150962	0.41642	0.0339382	7.11212e-34
19	rs11275597	18500290	T	TGGCACAATCACAGCTCACTGCAGC	0.184141	-0.383038	0.0313977	1.63034e-33
19	rs1054564	18499815	G	C	0.150575	0.411713	0.0339648	4.05576e-33
19	rs3787023	18498246	G	A	0.471849	0.290258	0.0240372	6.96892e-33
19	rs62122433	18502217	C	T	0.171311	-0.38961	0.0323265	9.10558e-33
19	rs7254789	18503019	T	C	0.18795	-0.377505	0.031421	1.41466e-32
19	rs1054221	18499858	T	C	0.147062	0.413363	0.0344526	1.71034e-32
19	rs57419676	18487479	C	T	0.18895	-0.376284	0.0314415	2.42624e-32
19	rs1055150	18499784	C	G	0.473569	0.288282	0.0241445	3.34744e-32
19	rs1227731	18497903	G	A	0.151128	0.404368	0.0338897	3.66999e-32
19	rs62122430	18495510	A	T	0.14922	0.404209	0.0340476	7.31237e-32
19	rs12979706	18495424	G	A	0.188139	-0.36481	0.0311342	4.25726e-31
19	rs35673587	18490927	A	T	0.151946	0.39826	0.034208	9.93462e-31
19	rs34345957	18503167	TG	T	0.152756	0.399588	0.0343245	1.00294e-30
19	rs6413435	18497137	G	A	0.185527	-0.360228	0.030967	1.10772e-30
19	rs35319012	18478389	T	A	0.149583	0.394493	0.0351474	1.02399e-28
19	rs12462034	18475226	T	C	0.203483	0.361449	0.0323934	2.09443e-28
19	rs34937778	18495997	G	A	0.184383	-0.345586	0.0315981	2.25196e-27
19	rs11881403	18477814	G	A	0.480173	0.268709	0.0246158	2.81039e-27
19	rs527290372	18490292	GA	G	0.476749	-0.281211	0.0262438	2.32867e-26
19	rs8105118	18489313	T	C	0.145024	0.370681	0.0349869	8.14315e-26
19	rs28735394	18483240	A	G	0.141305	0.373333	0.035245	8.34465e-26
19	rs3195944	18476711	A	G	0.14563	0.370824	0.0356125	5.26951e-25
19	rs7253758	18485963	C	G	0.199439	-0.318563	0.0312004	4.06058e-24
19	rs62122399	18481945	A	G	0.136345	0.368169	0.0361016	4.58105e-24
19	rs1043063	18480171	C	T	0.352386	0.26425	0.0260586	8.12253e-24
19	rs74180880	18484080	A	G	0.139185	0.361294	0.035661	8.90157e-24
19	rs35911336	18481825	A	G	0.143986	0.355527	0.0352877	1.5533e-23
19	rs12710316	18487541	C	T	0.135678	0.360034	0.0360626	3.8188e-23
19	rs71355881	18486222	C	A	0.13171	0.357198	0.036553	2.96475e-22
19	rs4808787	18475285	A	G	0.364851	-0.254012	0.0277021	8.15574e-20
19	rs112883268	18483155	G	T	0.122765	-0.347487	0.0388139	5.67026e-19
19	rs60164552	18488285	G	C	0.0868974	-0.40544	0.0461801	2.58681e-18
19	rs8106047	18505741	T	A	0.161291	0.299994	0.0343468	3.82912e-18
19	rs34324263	18491735	CT	C	0.244819	0.281995	0.0325912	7.74205e-18
19	rs138041211	18492727	G	A	0.0458193	0.540518	0.0653389	1.88021e-16
19	rs1985157	18513594	T	C	0.41439	0.192414	0.0248579	1.30664e-14
19	rs5827412	18512817	TAGAAAAAAA	T	0.414223	0.191473	0.0248204	1.59958e-14
19	rs35162418	18438955	C	CA	0.202378	0.26107	0.0342557	3.26338e-14
19	rs3859570	18510925	T	C	0.430748	0.18617	0.0249684	1.13165e-13
19	rs72620570	18413024	C	T	0.126552	0.303054	0.0409988	1.82699e-13
19	rs34809770	18505118	CT	C	0.404771	-0.202837	0.0280151	5.54623e-13
19	rs11668719	18515741	T	C	0.467358	0.171381	0.0243045	2.14761e-12
19	rs11086109	18511230	T	C	0.471554	0.171682	0.0244226	2.50545e-12
19	rs4808798	18517506	G	C	0.467502	0.170754	0.024337	2.75387e-12
19	rs12977553	18462030	G	A	0.135368	0.257395	0.0367652	3.06485e-12
19	rs35960487	18516307	CA	C	0.490192	0.173558	0.0248018	3.13612e-12
19	rs1560117	18512932	C	T	0.474015	0.16995	0.0243765	3.76164e-12
19	rs113700483	18494508	G	A	0.0417827	-0.462774	0.0664049	3.83868e-12
19	rs116986030	18504410	G	A	0.0497346	0.407323	0.0589281	5.70433e-12
19	rs559425478	18447011	A	AAAAG	0.118525	0.284159	0.0412339	6.59012e-12
19	rs34210970	18458663	C	T	0.146039	0.242208	0.0356832	1.3452e-11
19	rs35056431	18462999	GT	G	0.149659	0.246999	0.0364777	1.50567e-11
19	rs149920727	18463013	C	T	0.139329	0.252632	0.0373775	1.63725e-11
19	rs12461382	18502075	C	T	0.225378	-0.196972	0.0297882	4.39287e-11
19	rs1804826	18499238	G	T	0.225696	-0.194227	0.02968	6.91594e-11
19	rs1059369	18497141	T	A	0.225023	-0.191594	0.0295607	1.04417e-10
19	rs35258642	18447691	C	T	0.145781	0.231892	0.0359353	1.25657e-10
19	.	18447000	C	CAAAA	0.136898	0.245006	0.0381053	1.46276e-10
19	rs8105948	18490538	C	T	0.0737879	-0.31855	0.0496826	1.64401e-10
19	rs35534364	18504417	C	CG	0.077052	-0.329314	0.0515001	1.83821e-10
19	rs4808795	18501035	G	A	0.227166	-0.189873	0.0297356	1.94886e-10
19	rs73011458	18503812	A	G	0.244758	-0.188524	0.0295749	2.09134e-10
19	rs112125416	18560563	G	A	0.0565206	0.351018	0.05532	2.5239e-10
19	rs12610756	18447011	A	G	0.129589	0.249049	0.0395811	3.54425e-10
19	rs74180876	18445863	T	C	0.138753	0.231471	0.0368942	3.97895e-10
19	rs3746183	18474705	C	A	0.153635	0.218008	0.0349325	4.90694e-10
19	rs12978101	18454364	C	A	0.147296	0.22166	0.0358154	6.80097e-10
19	rs202084204	18515801	C	CT	0.110943	0.240606	0.038897	6.94059e-10
19	rs4808791	18491205	G	A	0.228923	-0.184161	0.0298158	7.34814e-10
19	rs78061871	18566637	G	A	0.158444	0.204921	0.0334869	1.04941e-09
19	rs147065945	18463728	C	CT	0.15777	0.2207	0.036157	1.15529e-09
19	rs113465793	18556417	A	C	0.143517	0.210018	0.0350653	2.33353e-09
19	rs11671863	18515802	C	A	0.367563	0.158174	0.0264915	2.61275e-09
19	rs200945193	18495085	C	CA	0.22781	-0.175354	0.0295524	3.2694e-09
19	rs78036311	18606369	G	T	0.13246	0.209055	0.0357654	5.55398e-09
19	rs10577640	18440959	CAT	C	0.0651163	-0.315516	0.0540573	5.84058e-09
19	rs74389203	18606656	G	A	0.132187	0.208692	0.0358471	6.38238e-09
19	rs74180875	18429780	C	T	0.13764	0.216594	0.0372264	6.51338e-09
19	rs11670449	18475240	A	G	0.102446	-0.258962	0.0446166	7.08102e-09
19	rs4808790	18486987	G	C	0.229483	-0.172606	0.0298032	7.62902e-09
19	rs111615037	18569910	G	A	0.030733	0.426402	0.0736323	7.65498e-09
19	rs77852139	18606526	T	G	0.132589	0.206431	0.0357495	8.44001e-09
19	rs73009453	18483859	C	T	0.0485229	-0.346866	0.0603836	1.00636e-08
19	rs139531520	18423759	G	A	0.0346561	-0.431147	0.075226	1.08588e-08
19	rs75696770	18435691	A	T	0.331755	0.16248	0.0283862	1.13407e-08
19	rs8101992	18614423	A	G	0.134361	0.203299	0.0356137	1.24105e-08
19	rs139751608	18493869	G	A	0.0209935	0.517005	0.0912762	1.60396e-08
19	rs145536188	18502282	A	G	0.0423658	0.352862	0.0625708	1.85018e-08
19	rs2303693	18557673	C	T	0.13605	0.197412	0.0353444	2.5209e-08
19	rs150286074	18469259	A	G	0.104718	-0.242862	0.0436672	2.8851e-08
19	rs78855479	18581916	C	T	0.135588	0.19612	0.0353764	3.19261e-08
19	rs8107222	18595089	C	T	0.135633	0.195242	0.0353358	3.54377e-08
19	rs79341622	18598213	T	C	0.136269	0.194611	0.0352481	3.62784e-08
19	rs111682204	18574235	T	C	0.136292	0.19475	0.0352798	3.64884e-08
19	rs113329334	18481033	C	T	0.0119508	0.664634	0.120485	3.72879e-08
19	rs7251067	18600056	G	A	0.136307	0.19469	0.035314	3.79676e-08
19	rs75245298	18581227	T	C	0.136497	0.194104	0.03525	3.94105e-08
19	rs79888481	18569957	G	A	0.13611	0.194333	0.0353111	4.00869e-08
19	rs75681761	18585329	G	A	0.136262	0.194022	0.0352754	4.08264e-08
19	rs138185133	18450140	T	C	0.0269008	0.453669	0.0825407	4.173e-08
19	rs75445489	18571150	G	A	0.136118	0.193433	0.0353087	4.61554e-08
19	rs200011234	18553344	GAC	G	0.135467	0.193582	0.0353709	4.75781e-08
19	rs77543386	18622193	T	C	0.145516	0.189641	0.0346521	4.76272e-08

## Sheet: Table S3c
Supplementary Table S3c. Significant (p-value < 5x10-8) genome-wide association study for INTERVAL-Olink.
Chr	SNP	Position	Other Allele	Effect Allele	MAF	Beta	SE	p-value
19	rs1227734	18501034	C	T	0.146938	0.512929	0.0277408	7.05528e-74
19	rs1054221	18499858	T	C	0.142722	0.51854	0.0280694	9.39836e-74
19	rs1054564	18499815	G	C	0.147154	0.508308	0.0276991	7.80542e-73
19	rs1227731	18497903	G	A	0.146667	0.507	0.0276851	1.50196e-72
19	rs34345957	18503167	TG	T	0.149181	0.511843	0.0281027	8.32372e-72
19	rs62122430	18495510	A	T	0.144705	0.499971	0.0279193	1.5037e-69
19	rs35673587	18490927	A	T	0.14739	0.495246	0.0280037	6.30928e-68
19	rs35319012	18478389	T	A	0.142782	0.471575	0.0287936	9.27813e-59
19	rs74180880	18484080	A	G	0.134275	0.467604	0.0293298	7.54633e-56
19	rs28735394	18483240	A	G	0.136247	0.465027	0.0292045	1.02051e-55
19	rs8105118	18489313	T	C	0.140524	0.456401	0.0287265	1.74519e-55
19	rs3195944	18476711	A	G	0.138375	0.461046	0.0292199	9.12801e-55
19	rs62122399	18481945	A	G	0.131404	0.465994	0.0297037	3.55882e-54
19	rs35911336	18481825	A	G	0.139033	0.450502	0.0289379	2.14775e-53
19	rs12710316	18487541	C	T	0.131153	0.448016	0.0298011	5.46437e-50
19	rs71355881	18486222	C	A	0.127238	0.439828	0.0302008	4.41227e-47
19	rs34324263	18491735	CT	C	0.247776	0.360492	0.0260878	1.19986e-42
19	rs11338117	18476735	CT	C	0.193464	0.287822	0.0259279	2.66376e-28
19	rs10408732	18477940	C	T	0.186639	0.285617	0.0261434	1.79202e-27
19	rs3746181	18477017	A	G	0.187056	0.285577	0.0261459	1.84237e-27
19	rs1363120	18482304	C	G	0.188586	0.284435	0.0261014	2.41263e-27
19	rs888663	18484922	G	T	0.185796	0.283526	0.0261024	3.51919e-27
19	rs62122429	18495014	A	G	0.183567	0.279112	0.025768	4.86851e-27
19	rs11880916	18492578	A	G	0.182438	0.280488	0.0262335	2.14304e-26
19	rs1227732	18498808	T	G	0.182654	0.274812	0.0257571	2.71961e-26
19	rs1227733	18499780	A	G	0.182669	0.273744	0.0258072	5.21489e-26
19	rs10423145	18494943	T	A	0.255646	0.260518	0.0256815	6.00579e-24
19	rs199975964	18497305	A	AC	0.0217677	0.712621	0.0729247	2.35618e-22
19	rs141542836	18496989	C	T	0.0205932	0.690662	0.074435	2.49996e-20
19	rs139751608	18493869	G	A	0.0207437	0.684491	0.0740419	3.42142e-20
19	rs12977553	18462030	G	A	0.133959	0.259751	0.0300202	6.70442e-18
19	rs3746183	18474705	C	A	0.150607	0.23504	0.0283206	1.33561e-16
19	rs12610756	18447011	A	G	0.130692	0.263395	0.0320795	2.77655e-16
19	19:18447000_C_CAAAA	18447000	C	CAAAA	0.133813	0.258991	0.0316415	3.42228e-16
19	rs559425478	18447011	A	AAAAG	0.114259	0.277399	0.0342424	6.79686e-16
19	rs7254789	18503019	T	C	0.187908	-0.213304	0.0263816	7.71929e-16
19	rs1059022	18499151	C	T	0.18034	-0.21173	0.0262495	9.02255e-16
19	rs8101249	18501830	A	C	0.183507	-0.211466	0.0263824	1.35712e-15
19	rs34210970	18458663	C	T	0.144499	0.234783	0.0293033	1.39263e-15
19	rs34937778	18495997	G	A	0.181399	-0.21174	0.0264647	1.52544e-15
19	rs35056431	18462999	GT	G	0.149538	0.23613	0.0297122	2.34115e-15
19	rs6413435	18497137	G	A	0.183934	-0.206305	0.025968	2.39081e-15
19	rs149920727	18463013	C	T	0.139048	0.242809	0.0306038	2.60248e-15
19	rs113323060	18498563	T	TGGAAG	0.179878	-0.207585	0.0261994	2.8332e-15
19	rs12979706	18495424	G	A	0.18707	-0.205084	0.0260867	4.61452e-15
19	rs12978101	18454364	C	A	0.145869	0.226675	0.029349	1.36012e-14
19	rs35258642	18447691	C	T	0.142817	0.228297	0.0295629	1.37091e-14
19	rs11275597	18500290	T	TGGCACAATCACAGCTCACTGCAGC	0.182403	-0.203628	0.0263846	1.42229e-14
19	rs74180876	18445863	T	C	0.136589	0.233037	0.0302929	1.72419e-14
19	rs57419676	18487479	C	T	0.188465	-0.200653	0.0262459	2.48928e-14
19	rs147065945	18463728	C	CT	0.155179	0.225807	0.02972	3.57616e-14
19	rs28568614	18479019	A	G	0.432327	0.14982	0.0206462	4.58351e-13
19	rs62122433	18502217	C	T	0.172982	-0.195476	0.0270891	6.15989e-13
19	rs74180875	18429780	C	T	0.136313	0.207826	0.0305348	1.12048e-11
19	rs117662356	18482568	C	G	0.011077	0.717152	0.105934	1.4386e-11
19	rs113329334	18481033	C	T	0.0111172	0.674899	0.100496	2.08085e-11
19	rs35738734	18494537	GA	G	0.338842	0.152231	0.0228936	3.25689e-11
19	rs11341732	18481783	CA	C	0.456003	0.132555	0.0207738	1.92067e-10
19	rs62122428	18494090	A	G	0.0279311	0.387781	0.0615776	3.28623e-10
19	rs12610811	18479047	C	G	0.4368	0.12927	0.0206458	4.13844e-10
19	rs112883268	18483155	G	T	0.11737	-0.202655	0.0331872	1.09632e-09
19	rs749451	18479647	T	C	0.438782	0.122462	0.0206139	3.03026e-09
19	rs3746184	18474587	T	A	0.378879	0.130207	0.0219207	3.04549e-09
19	rs7253758	18485963	C	G	0.19887	-0.153806	0.025948	3.28384e-09
19	rs35653549	18446636	C	T	0.0291808	0.396304	0.0675458	4.71913e-09
19	rs11670449	18475240	A	G	0.0985993	-0.215375	0.0370269	6.37628e-09
19	rs563044548	18771672	G	A	0.0159405	0.484387	0.0849539	1.25415e-08
19	rs60570301	18597196	G	A	0.119233	-0.183313	0.0322579	1.40102e-08
19	rs181004295	18537508	C	T	0.013958	0.512453	0.0908559	1.79155e-08
19	rs573908035	18833834	T	G	0.0143696	0.493938	0.0886381	2.64292e-08
19	rs34666550	18502861	C	T	0.0191728	0.405292	0.0737394	4.07231e-08
19	rs7251640	18614935	T	C	0.200798	-0.141972	0.0258718	4.27857e-08

## Sheet: Table S3d
Supplementary Table S3d. Meta-analysis of fine mapped GDF15 GWAS variants in FINRISK and INTERVAL.
			FINRISK		INTERVAL-Somascan		INTERVAL-Olink		Meta-analysis
SNPs	LD block	EA/OA	beta	p-value	beta	p-value	beta	p-value	beta	p-value	Heterogeneity I2	Heterogeneity p-value
rs16982345	1	A/G	-0.34	4.6x10-83	0.57	1.1x10-92	0.01	0.72	-0.05	3.7x10-5	0.998	3.2x10-177
rs1058587	1	G/C	-0.34	5.5x10-83	0.57	1.3x10-92	0.01	0.77	-0.05	3.4x10-5	0.998	5.4x10-177
rs3787023	1	A/G	-0.11	8.9x10-12	0.29	7.0x10-33	0.04	0.072	0.02	0.066	0.99	1.6x10-42
rs1055150	1	G/C	-0.11	8.3x10-12	0.29	3.3x10-32	0.04	0.08	0.02	0.086	0.989	6.9x10-42
rs1059369	1	A/T	0.18	8.2x10-28	-0.19	1.0x10-10	0.04	0.078	0.09	2.0x10-10	0.984	5.9x10-28
rs1054221	2	C/T	0.48	1.1x10-54	0.41	1.7x10-32	0.52	9.4x10-74	0.48	3.5x10-160	0.643	0.061
rs1227734	2	T/C	0.48	1.3x10-54	0.42	7.1x10-34	0.51	7.1x10-74	0.47	7.6x10-162	0.587	0.089
rs189593084	3	A/C	-0.25	6.4x10-8	-	-	-0.47	0.0053	-0.26	2.5x10-9	0.38	0.2
Variants listed in table were identified by fine mapping GWAS results from FINRISK and INTERVAL. LD blocks were defined as SNPs that had LD > 0.1 with the lead variant (most significantly associated variant).

## Sheet: Table S3e
Supplementary Table S3e. Linkage disequilibrium (R2) between fine mapped variants in FINRISK, INTERVAL-SomaScan and INTERVAL-Olink.
	rs16982345	rs1054221	rs1059369	rs189593084	rs3787023	rs1058587	rs1227734	rs1055150
rs16982345		-	0.11	-	0.34	1	-	0.33
rs1054221	-		-	-	0.16	-	1	0.16
rs1059369	0.11	-		-	0.33	0.11	-	0.33
rs189593084	-	-	-		-	-	-	-
rs3787023	0.34	0.16	0.33	-		0.34	0.16	0.99
rs1058587	1	-	0.11	-	0.34		-	0.33
rs1227734	-	1	-	-	0.16	-		0.16
rs1055150	0.33	0.16	0.33	-	0.99	0.33	0.16

## Sheet: Table Sf
Supplementary Table S3f. Significant (p-value < 5x10-8) genome-wide association study for FINRISK conditioned on rs1058587
Chr	SNP	Position	Other Allele	Effect Allele	Effect allele frequency	Beta	p-value
19	rs1054221	18499858	T	C	0.071538	0.384435	3.41996e-37
19	rs1054564	18499815	G	C	0.0716347	0.38374	3.67426e-37
19	rs1227734	18501034	C	T	0.071626	0.38372	3.90194e-37
19	rs1227731	18497903	G	A	0.0711885	0.38364	5.23939e-37
19	rs62122430	18495510	A	T	0.0711879	0.383677	5.26267e-37
19	rs34345957	18503167	TG	T	0.0711327	0.383612	8.16107e-37
19	rs35673587	18490927	A	T	0.0793368	0.345296	5.78239e-33
19	rs8105118	18489313	T	C	0.0790953	0.344611	9.39329e-33
19	rs74180880	18484080	A	G	0.0729592	0.342642	3.75682e-30
19	rs35911336	18481825	A	G	0.0725115	0.342624	5.6107e-30
19	rs62122399	18481945	A	G	0.0727102	0.340364	1.15753e-29
19	rs12710316	18487541	C	T	0.0704509	0.315841	4.07722e-25
19	rs3195944	18476711	A	G	0.0652406	0.312931	8.97395e-23
19	rs35319012	18478389	T	A	0.065108	0.311729	1.25821e-22
19	rs1059022	18499151	C	T	0.204959	-0.155582	1.44025e-14
19	rs113323060	18498563	T	TGGAAG	0.20495	-0.155587	1.44763e-14
19	rs8101249	18501830	A	C	0.205098	-0.155406	1.57375e-14
19	rs7254789	18503019	T	C	0.205098	-0.154893	2.03417e-14
19	rs571160599	18500290	T	TGGCACAATCACAGCTCACTGCAGC	0.204949	-0.154755	2.04716e-14
19	rs62122433	18502217	C	T	0.203013	-0.155136	2.28286e-14
19	rs189593084	18475805	C	A	0.0318869	-0.331977	8.435e-14
19	rs6413435	18497137	G	A	0.221381	-0.141304	2.24461e-13
19	rs34937778	18495997	G	A	0.2212	-0.140794	2.81312e-13
19	rs12979706	18495424	G	A	0.226743	-0.139578	3.79997e-13
19	rs111503327	18557824	G	A	0.0373062	-0.272962	2.33675e-11
19	rs112132822	18581017	G	A	0.038424	-0.268352	2.6624e-11
19	rs202163868	18584994	CA	C	0.0384239	-0.268352	2.66247e-11
19	rs111527728	18630267	C	T	0.0372966	-0.272444	2.66433e-11
19	rs111367398	18631845	C	G	0.0383879	-0.268195	2.91706e-11
19	rs112551620	18632460	G	A	0.0383853	-0.268156	2.95135e-11
19	rs112512188	18597013	T	A	0.038778	-0.261014	7.52994e-11
19	rs117229635	18324527	T	C	0.0364387	-0.267884	1.21947e-10
19	rs113103572	18498183	A	T	0.0386678	-0.25867	1.23585e-10
19	rs57419676	18487479	C	T	0.234041	-0.121981	1.26682e-10
19	rs188160295	18612990	G	A	0.000631203	-2.04115	2.37979e-10
19	rs7253758	18485963	C	G	0.234842	-0.119909	2.48322e-10
19	rs138352841	18473461	C	T	0.000636368	-2.12598	3.00898e-10
19	rs772069758	18787833	G	GT	0.0314573	-0.278552	3.86367e-10
19	rs111445982	18421242	C	T	0.0359568	-0.260926	4.4856e-10
19	rs117641542	18468501	C	T	0.0077279	0.531063	1.69116e-09
19	rs199975964	18497305	A	AC	0.00884823	0.498047	1.75328e-09
19	rs113778921	18864675	C	T	0.0643459	-0.191278	1.80618e-09
19	rs139751608	18493869	G	A	0.00887485	0.495991	1.84411e-09
19	rs141542836	18496989	C	T	0.00887618	0.495755	1.84867e-09
19	rs146312473	18465417	G	A	0.00773158	0.528912	1.95744e-09
19	rs138515339	18830047	G	T	0.0315814	-0.265333	2.21155e-09
19	rs112041952	18674555	G	A	0.0390627	-0.239722	2.27993e-09
19	rs117662356	18482568	C	G	0.00815131	0.507995	3.27735e-09
19	VAR_19_18979164_T_C	18979164	T	C	0.0312798	-0.258356	7.13043e-09
19	rs118170439	19017825	G	A	0.0359462	-0.237588	1.40615e-08
19	rs117938925	18834049	C	G	0.0676431	-0.174247	1.6517e-08
19	rs113377929	18430381	C	A	0.0550598	-0.191052	2.5449e-08
19	rs76580597	18428632	C	T	0.0550583	-0.190178	2.99664e-08
19	rs112949659	18739895	G	A	0.0354986	-0.229826	3.89662e-08

## Sheet: Table S3g
Supplementary Table S3g. Significant (p-value < 5x10-8) genome-wide association study for INTERVAL-SomaScan conditioned on rs1058587
rsid	MarkerName	Effect Allele	Other Allele	Effect	StdErr	Zscore	Pval	all_total
rs1227734	19_18501034_658342	T	C	0.6175	0.0319	19.3574	1.76689e-83	4981
rs1054221	19_18499858_658315	T	C	-0.6247	0.0324	-19.2809	7.77664e-83	4981
rs1054564	19_18499815_658311	C	G	0.6146	0.0319	19.2665	1.02732e-82	4981
rs62122430	19_18495510_658192	A	T	-0.6111	0.032	-19.0969	2.68059e-81	4981
rs1227731	19_18497903_658260	A	G	0.6076	0.0319	19.047	6.95479e-81	4981
rs34345957	19_18503167_658416	T	TG	0.6152	0.0323	19.0464	7.03257e-81	4981
rs35673587	19_18490927_658053	A	T	-0.6085	0.0322	-18.8975	1.19551e-79	4981
rs35319012	19_18478389_657646	A	T	0.5949	0.0331	17.9728	3.18184e-72	4981
rs8105118	19_18489313_658000	T	C	-0.5702	0.033	-17.2788	6.79613e-67	4981
rs3195944	19_18476711_657602	A	G	-0.5699	0.0336	-16.9613	1.58766e-64	4981
NA	19_18483240_657818	A	G	-0.5613	0.0332	-16.9066	4.02076e-64	4981
rs74180880	19_18484080_657839	A	G	-0.5696	0.0337	-16.9021	4.34333e-64	4981
rs62122399	19_18481945_657771	A	G	-0.5755	0.0341	-16.8768	6.66246e-64	4981
rs35911336	19_18481825_657765	A	G	-0.5593	0.0333	-16.7958	2.61967e-63	4981
rs12710316	19_18487541_657942	T	C	0.5609	0.034	16.4971	3.85203e-61	4981
NA	19_18486222_657903	A	C	0.5604	0.0345	16.2435	2.4843e-59	4981
NA	19_18491735_658075	CT	C	-0.4402	0.0308	-14.2922	2.44726e-46	4981
NA	19_18494943_658179	A	T	0.3441	0.0303	11.3564	6.88987e-30	4981
rs149920727	19_18463013_657126	T	C	0.3673	0.0352	10.4347	1.72231e-25	4981
rs12977553	19_18462030_657086	A	G	0.3576	0.0345	10.3652	3.56946e-25	4981
rs35056431	19_18462999_657124	G	GT	0.3527	0.0343	10.2828	8.4245e-25	4981
rs34210970	19_18458663_656968	T	C	0.3428	0.0335	10.2328	1.41319e-24	4981
NA	19_18447011_656593	A	AAAAG	-0.3955	0.0387	-10.2196	1.61944e-24	4981
rs3746183	19_18474705_657499	A	C	0.3243	0.0329	9.85714	6.38401e-23	4981
NA	19_18447691_656607	T	C	0.3313	0.0338	9.80178	1.10624e-22	4981
rs12978101	19_18454364_656813	A	C	0.3247	0.0337	9.63501	5.68838e-22	4981
NA	19_18447000_656590	CAAAA	C	0.3439	0.0358	9.60615	7.53159e-22	4981
rs74180876	19_18445863_656558	T	C	-0.3303	0.0347	-9.51873	1.75305e-21	4981
NA	19_18463728_657149	CT	C	0.3177	0.034	9.34412	9.26588e-21	4981
rs11338117	19_18476735_657603	CT	C	-0.2831	0.0306	-9.25163	2.21087e-20	4981
NA	19_18447011_656592	A	G	-0.342	0.0372	-9.19355	3.80092e-20	4981
rs888663	19_18484922_657861	T	G	0.2751	0.0309	8.90291	5.44e-19	4981
rs1227732	19_18498808_658276	T	G	-0.2698	0.0304	-8.875	6.99334e-19	4981
rs11880916	19_18492578_658101	A	G	-0.2759	0.0311	-8.87138	7.22433e-19	4981
rs1227733	19_18499780_658308	A	G	-0.2702	0.0305	-8.85902	8.07235e-19	4981
rs3746181	19_18477017_657611	A	G	-0.2716	0.031	-8.76129	1.93028e-18	4981
rs62122429	19_18495014_658182	A	G	-0.2657	0.0304	-8.74013	2.32839e-18	4981
rs1363120	19_18482304_657781	C	G	-0.2698	0.0309	-8.73139	2.51558e-18	4981
rs10408732	19_18477940_657632	T	C	0.2683	0.0311	8.62701	6.29769e-18	4981
rs74180875	19_18429780_656050	T	C	0.3003	0.035	8.58	9.48731e-18	4981
rs10854165	19_18475146_657527	A	G	0.2853	0.0333	8.56757	1.05694e-17	4981
rs28568614	19_18479019_657662	A	G	-0.2055	0.0263	-7.81369	5.55384e-15	4981
rs141542836	19_18496989_658231	T	C	0.6313	0.0828	7.6244	2.45179e-14	4981
NA	19_18494537_658168	G	GA	0.2081	0.0273	7.62271	2.48403e-14	4981
rs1059022	19_18499151_658286	T	C	-0.2317	0.0309	-7.49838	6.46104e-14	4981
rs139751608	19_18493869_658146	A	G	0.6433	0.0858	7.49767	6.49627e-14	4981
rs113323060	19_18498563_658270	T	TGGAAG	0.2287	0.0309	7.40129	1.34863e-13	4981
rs8101249	19_18501830_658363	A	C	0.2305	0.0312	7.38782	1.49255e-13	4981
rs55947999	19_18492781_658109	A	G	0.2023	0.0276	7.32971	2.30651e-13	4981
rs56033872	19_18492766_658106	A	C	-0.2021	0.0276	-7.32246	2.43459e-13	4981
rs57419676	19_18487479_657938	T	C	-0.2268	0.031	-7.31613	2.55226e-13	4981
rs62122433	19_18502217_658374	T	C	-0.2323	0.0319	-7.28213	3.28586e-13	4981
rs7254789	19_18503019_658409	T	C	0.2256	0.031	7.27742	3.40266e-13	4981
rs571160599	19_18500290_658326	T	TGGCACAATCACAGCTCACTGCAGC	0.2256	0.0311	7.25402	4.04582e-13	4981
rs12979706	19_18495424_658191	A	G	-0.2219	0.0306	-7.25163	4.11773e-13	4981
rs62122428	19_18494090_658156	A	G	-0.5062	0.0704	-7.19034	6.46297e-13	4981
rs199975964	19_18497305_658245	A	AC	-0.5918	0.0825	-7.17333	7.31933e-13	4981
rs6413435	19_18497137_658239	A	G	-0.2179	0.0304	-7.16776	7.6233e-13	4981
NA	19_18493620_658137	CA	C	-0.1925	0.0275	-7	2.55963e-12	4981
rs12459566	19_18493295_658121	T	C	-0.1924	0.0275	-6.99636	2.62691e-12	4981
rs113942086	19_18492583_658102	A	T	-0.1919	0.0275	-6.97818	2.99025e-12	4981
rs2059039	19_18491993_658079	A	G	-0.1917	0.0275	-6.97091	3.14899e-12	4981
NA	19_18492427_658095	CA	C	-0.1912	0.0275	-6.95273	3.58291e-12	4981
rs4808792	19_18491213_658064	T	C	0.1901	0.0274	6.93796	3.97813e-12	4981
rs4808794	19_18493852_658143	A	G	-0.1906	0.0275	-6.93091	4.18145e-12	4981
rs3848647	19_18502078_658368	A	G	0.187	0.027	6.92593	4.33133e-12	4981
rs4808793	19_18493837_658142	C	G	-0.1903	0.0275	-6.92	4.51644e-12	4981
rs1059519	19_18497024_658235	C	G	-0.1864	0.027	-6.9037	5.06639e-12	4981
rs3848646	19_18501986_658365	T	G	0.185	0.027	6.85185	7.29e-12	4981
rs6512263	19_18502691_658392	A	C	0.1843	0.0269	6.8513	7.31813e-12	4981
rs6512264	19_18502728_658394	A	C	-0.1843	0.0269	-6.8513	7.31813e-12	4981
rs4328570	19_18502301_658378	T	C	-0.1842	0.0269	-6.84758	7.51078e-12	4981
rs3848649	19_18502337_658382	C	G	0.1842	0.0269	6.84758	7.51078e-12	4981
rs3848648	19_18502119_658370	T	C	-0.1841	0.0269	-6.84387	7.70839e-12	4981
rs8101804	19_18496107_658208	T	C	0.1847	0.027	6.84074	7.87847e-12	4981
rs12459782	19_18496495_658216	T	C	0.1848	0.0271	6.81919	9.15564e-12	4981
rs112804925	19_18492258_658089	T	TA	-0.1869	0.0275	-6.79636	1.07293e-11	4981
rs10424912	19_18489082_657993	T	C	-0.1812	0.0268	-6.76119	1.36859e-11	4981
rs6512265	19_18502835_658399	A	G	-0.1842	0.0273	-6.74725	1.50671e-11	4981
rs6512262	19_18502565_658389	C	G	-0.1817	0.027	-6.72963	1.70095e-11	4981
NA	19_18481783_657763	CA	C	-0.1886	0.0281	-6.71174	1.92312e-11	4981
rs34937778	19_18495997_658199	A	G	-0.2072	0.0309	-6.7055	2.00716e-11	4981
rs34666550	19_18502861_658400	T	C	0.6045	0.0905	6.67956	2.39664e-11	4981
rs6512266	19_18503093_658413	T	G	0.181	0.0274	6.60584	3.95271e-11	4981
rs749451	19_18479647_657678	T	C	-0.1742	0.0264	-6.59848	4.15381e-11	4981
rs189448488	19_18492194_658086	A	G	0.5662	0.0875	6.47086	9.74485e-11	4981
rs3746184	19_18474587_657493	A	T	0.1602	0.0248	6.45968	1.04926e-10	4981
NA	19_18481033_657731	T	C	0.7277	0.1131	6.43413	1.24183e-10	4981
rs35653549	19_18446636_656582	T	C	0.4732	0.0737	6.42062	1.35717e-10	4981
rs12610811	19_18479047_657663	C	G	-0.1676	0.0264	-6.34848	2.17446e-10	4981
NA	19_18483223_657816	A	G	-0.157	0.026	-6.03846	1.55591e-09	4981
rs138185133	19_18450140_656684	T	C	-0.4579	0.0774	-5.91602	3.29824e-09	4981
rs35999725	19_18439520_656365	T	C	0.1539	0.0271	5.67897	1.35511e-08	4981
rs7251610	19_18489734_658011	T	C	0.1527	0.0274	5.57299	2.504e-08	4981
rs4808128	19_18490426_658033	T	C	0.1508	0.0275	5.48364	4.16671e-08	4981
rs76668818	19_18583243_661041	T	C	-0.4421	0.081	-5.45802	4.81461e-08	4981

## Sheet: Table S3h
Supplementary Table S3h. Significant (p-value < 5x10-8) genome-wide association study meta-analysis for FINRISK, INTERVAL-SomaScan and INTERVAL-Olink
MarkerName	Effect Allele	Other allele	Effect	StdErr	P-value	Direction	HetISq	HetChiSq	HetDf	HetPVal
rs1227734	t	c	0.5007	0.0172	2.51e-187	+++	93.1	28.881	2	5.353e-07
rs1054221	t	c	-0.5041	0.0173	2.38e-186	---	93.4	30.076	2	2.945e-07
rs1054564	c	g	0.4981	0.0171	1.19e-185	+++	92.9	28.086	2	7.964e-07
rs1227731	a	g	0.4957	0.0171	1.02e-183	+++	92.4	26.448	2	1.807e-06
rs34345957	t	tg	0.499	0.0173	2.07e-182	+++	92.8	27.89	2	8.784e-07
rs62122430	a	t	-0.4938	0.0172	8.04e-181	---	92.6	26.98	2	1.385e-06
rs35673587	a	t	-0.4741	0.017	6.75e-171	---	94.8	38.143	2	5.215e-09
rs8105118	t	c	-0.4472	0.0173	2.62e-147	---	92.5	26.742	2	1.56e-06
rs35319012	a	t	0.4567	0.0179	3.2e-143	+++	94.8	38.597	2	4.157e-09
rs74180880	a	g	-0.4517	0.0178	1.98e-142	---	92.3	25.871	2	2.411e-06
rs62122399	a	g	-0.4512	0.0179	1.08e-139	---	92.7	27.254	2	1.208e-06
rs35911336	a	g	-0.4436	0.0176	2.02e-139	---	91.5	23.493	2	7.917e-06
rs3195944	a	g	-0.4444	0.0181	4.78e-133	---	93.6	31.45	2	1.482e-07
rs12710316	t	c	0.4332	0.018	1.64e-127	+++	93.2	29.29	2	4.363e-07
rs11338117	ct	c	-0.2159	0.0151	3.125e-46	---	93.4	30.131	2	2.865e-07
rs62122429	a	g	-0.2105	0.0151	2.137e-44	---	92	24.983	2	3.759e-06
rs1227732	t	g	-0.21	0.0151	3.28e-44	---	91.9	24.671	2	4.394e-06
rs3746181	a	g	-0.2117	0.0152	3.974e-44	---	92.8	27.596	2	1.018e-06
rs888663	t	g	0.2108	0.0151	4.461e-44	+++	93	28.468	2	6.581e-07
rs1227733	a	g	-0.2097	0.0151	6.502e-44	---	91.8	24.416	2	4.99e-06
rs11880916	a	g	-0.2114	0.0152	7.994e-44	---	92.5	26.514	2	1.748e-06
rs1363120	c	g	-0.2101	0.0151	9.2e-44	---	92.8	27.804	2	9.172e-07
rs10408732	t	c	0.2102	0.0152	1.616e-43	+++	92.8	27.635	2	9.98e-07
rs12977553	a	g	0.2617	0.0195	3.2e-41	+++	88	16.636	2	0.0002441
rs199975964	a	ac	-0.6105	0.0456	6.454e-41	---	48.3	3.865	2	0.1448
rs141542836	t	c	0.6117	0.0459	1.878e-40	+++	36.8	3.164	2	0.2056
rs1059022	t	c	-0.1881	0.0142	4.962e-40	---	63	5.4	2	0.06721
rs139751608	a	g	0.6128	0.0463	6.45e-40	+++	34.9	3.074	2	0.215
rs8101249	a	c	0.1875	0.0143	1.737e-39	+++	61.9	5.254	2	0.07229
rs113323060	t	tggaag	0.1863	0.0142	2.482e-39	+++	58.9	4.86	2	0.08802
rs7254789	t	c	0.1869	0.0142	2.623e-39	+++	60.6	5.071	2	0.07923
rs34210970	t	c	0.2475	0.019	1.089e-38	+++	86.9	15.241	2	0.0004903
rs149920727	t	c	0.2513	0.0195	6.366e-38	+++	90.2	20.493	2	3.547e-05
rs35056431	g	gt	0.2461	0.0191	6.763e-38	+++	89	18.128	2	0.0001157
rs6413435	a	g	-0.1753	0.0138	4.118e-37	---	69.3	6.517	2	0.03845
rs12979706	a	g	-0.1746	0.0138	9.781e-37	---	71.8	7.091	2	0.02885
rs62122433	t	c	-0.1825	0.0145	1.707e-36	---	55.4	4.489	2	0.106
rs34937778	a	g	-0.1738	0.0139	6.942e-36	---	67.6	6.168	2	0.04577
rs12978101	a	c	0.2376	0.0191	1.283e-35	+++	84.1	12.608	2	0.001829
rs74180876	t	c	-0.2406	0.0195	6.268e-35	---	84.6	12.95	2	0.001542
rs57419676	t	c	-0.1643	0.0138	7.544e-33	---	81.8	10.979	2	0.004129
rs3746183	a	c	0.189	0.0165	2.906e-30	+++	95.2	41.924	2	7.876e-10
rs74180875	t	c	0.2212	0.0197	2.284e-29	+++	77.6	8.913	2	0.0116
rs62122428	a	g	-0.3665	0.0343	1.346e-26	---	71.6	7.043	2	0.02955
rs7253758	c	g	0.1386	0.0137	4.125e-24	+++	6.8	2.146	2	0.342
rs117662356	c	g	-0.5878	0.0583	7.247e-24	---	15.4	2.364	2	0.3066
rs3746184	a	t	0.1148	0.0121	3.08e-21	+++	73.3	7.491	2	0.02362
rs34666550	t	c	0.4726	0.0533	7.2e-19	+++	38.6	3.257	2	0.1962
rs181004295	t	c	0.5096	0.058	1.528e-18	+++	0	0.002	2	0.9989
rs28568614	a	g	-0.1059	0.0121	2.489e-18	---	94.9	39.157	2	3.142e-09
rs3848647	a	g	0.1108	0.0128	6.432e-18	+++	81.4	10.745	2	0.004643
rs3848648	t	c	-0.11	0.0128	9.203e-18	---	80.4	10.193	2	0.006118
rs6512263	a	c	0.11	0.0128	9.941e-18	+++	80.6	10.299	2	0.005801
rs6512264	a	c	-0.1099	0.0128	1.024e-17	---	80.6	10.305	2	0.005786
rs1059519	c	g	-0.11	0.0128	1.08e-17	---	81.3	10.686	2	0.004781
rs4328570	t	c	-0.1098	0.0128	1.085e-17	---	80.6	10.283	2	0.005849
rs3848649	c	g	0.1098	0.0128	1.092e-17	+++	80.6	10.285	2	0.005844
rs3848646	t	g	0.1099	0.0128	1.12e-17	+++	80.7	10.377	2	0.005582
rs6512262	c	g	-0.1092	0.0128	1.733e-17	---	79.4	9.688	2	0.007877
rs6512265	a	g	-0.1099	0.0129	1.889e-17	---	80	10.003	2	0.006729
rs6512266	t	g	0.109	0.013	4.31e-17	+++	78.5	9.323	2	0.009451
rs8101804	t	c	0.1079	0.0129	4.775e-17	+++	81.2	10.621	2	0.004939
rs35653549	t	c	0.3306	0.0395	5.445e-17	+++	82.8	11.611	2	0.003011
rs12459566	t	c	-0.1086	0.013	5.813e-17	---	83.5	12.087	2	0.002373
rs55947999	a	g	0.1084	0.013	5.997e-17	+++	86.7	15.086	2	0.0005297
rs56033872	a	c	-0.1081	0.013	7.293e-17	---	86.7	15.083	2	0.0005306
rs12459782	t	c	0.1073	0.0129	7.415e-17	+++	81.3	10.688	2	0.004776
rs4808794	a	g	-0.1081	0.013	8.074e-17	---	82.9	11.717	2	0.002856
rs189448488	a	g	0.4458	0.0535	8.356e-17	+++	46.4	3.734	2	0.1546
rs4808793	c	g	-0.108	0.013	8.632e-17	---	82.8	11.658	2	0.00294
rs112883268	t	g	-0.1431	0.0172	9.101e-17	---	81.1	10.583	2	0.005034
rs189593084	a	c	-0.3492	0.0422	1.324e-16	---	0	1.827	2	0.401
rs117641542	t	c	0.6014	0.0727	1.374e-16	+++	59.1	4.89	2	0.08674
rs2059039	a	g	-0.1066	0.0129	1.49e-16	---	84.1	12.559	2	0.001874
rs10424912	t	c	-0.1019	0.0124	1.574e-16	---	83.4	12.054	2	0.002412
rs563044548	a	g	0.465	0.0564	1.695e-16	+++	0	0.648	2	0.7231
rs4808792	t	c	0.106	0.0129	1.87e-16	+++	83.8	12.362	2	0.002069
rs113942086	a	t	-0.1058	0.0129	2.641e-16	---	84.4	12.829	2	0.001637
rs112804925	t	ta	-0.1053	0.0129	3.937e-16	---	82.5	11.405	2	0.003337
rs146312473	a	g	0.623	0.0773	7.417e-16	+++	65.5	5.805	2	0.05487
rs573908035	t	g	-0.4705	0.0588	1.203e-15	---	0	0.463	2	0.7935
rs145264427	a	g	-0.4446	0.0561	2.189e-15	---	0	0.828	2	0.661
rs138230038	c	g	0.4492	0.0568	2.668e-15	+++	0	0.549	2	0.76
rs60164552	c	g	-0.1715	0.0219	5.123e-15	---	66.5	5.977	2	0.05036
rs141474753	a	g	0.441	0.0565	5.81e-15	+++	0	0.714	2	0.6999
rs12610811	c	g	-0.0899	0.0121	1.28e-13	---	92.3	26.103	2	2.147e-06
rs749451	t	c	-0.0891	0.0121	2.005e-13	---	92.4	26.36	2	1.888e-06
rs73009436	a	g	-0.0829	0.0114	3.894e-13	---	73.3	7.478	2	0.02378
rs8105948	t	c	-0.1381	0.0193	7.679e-13	---	61.9	5.251	2	0.07239
rs75119307	t	c	0.2578	0.0364	1.383e-12	+++	17.7	2.429	2	0.2969
rs111527728	t	c	-0.2588	0.0367	1.884e-12	---	29.7	2.844	2	0.2412
rs11670449	a	g	0.157	0.0223	2.126e-12	+++	81.8	10.964	2	0.004162
rs117229635	t	c	0.2674	0.0382	2.517e-12	+++	0	0.088	2	0.9568
rs112132822	a	g	-0.2412	0.0349	4.573e-12	---	23	2.598	2	0.2728
rs61758311	t	c	0.3366	0.0494	9.187e-12	+++	0	0.955	2	0.6204
rs111503327	a	g	-0.2443	0.0365	2.33e-11	---	39	3.28	2	0.194
rs112512188	a	t	-0.2316	0.0348	2.683e-11	---	34.1	3.034	2	0.2194
rs189080810	t	c	0.3313	0.0499	3.054e-11	+++	0	1.052	2	0.5911
rs138515339	t	g	-0.2704	0.0407	3.21e-11	---	0	0.932	2	0.6275
rs546369689	t	tggggcctctcagcaagtgagggccaag	0.3429	0.0518	3.564e-11	+++	0	0.066	2	0.9675
rs7251610	t	c	0.0853	0.0129	4.058e-11	+++	75.3	8.093	2	0.01748
rs4808128	t	c	0.0849	0.0129	5.144e-11	+++	73.9	7.672	2	0.02157
rs117674834	a	g	0.3211	0.0492	6.702e-11	+++	0	0.639	2	0.7267
rs8113130	a	g	0.102	0.0157	7.632e-11	+++	59.5	4.939	2	0.08464
rs11673678	t	c	-0.0831	0.0128	8.511e-11	---	0	0.484	2	0.785
rs111615037	a	g	0.2552	0.0395	1.041e-10	+++	48.5	3.883	2	0.1435
rs202163868	ca	c	0.2211	0.0342	1.041e-10	+++	68.2	6.295	2	0.04295
rs112551620	a	g	-0.2205	0.0342	1.155e-10	---	69.5	6.556	2	0.03771
rs111367398	c	g	0.2204	0.0343	1.264e-10	+-+	70.8	6.856	2	0.03244
rs10854165	a	g	0.1048	0.0164	1.88e-10	-++	96.5	57.266	2	3.672e-13
rs62122392	t	c	-0.0806	0.0128	2.608e-10	---	0	0.697	2	0.7059
rs138185133	t	c	-0.2991	0.0481	4.936e-10	---	70.8	6.852	2	0.03252
rs112041952	a	g	-0.2174	0.035	5.033e-10	---	0	1.977	2	0.3722
rs78230247	a	g	0.2247	0.0362	5.279e-10	+++	29.6	2.842	2	0.2415
rs113103572	a	t	0.2084	0.0337	6.012e-10	+++	62.3	5.308	2	0.07038
rs141136594	t	c	0.6859	0.1108	6.031e-10	+++	0	1.455	2	0.4832
rs150286074	a	g	0.1309	0.0213	8.593e-10	+++	76.7	8.602	2	0.01356
rs8110358	a	g	-0.1234	0.0202	1.057e-09	---	0	1.206	2	0.5471
rs111274817	a	g	0.1928	0.0316	1.061e-09	+++	76.4	8.486	2	0.01436
rs74953716	t	c	0.1919	0.0316	1.321e-09	+++	70.4	6.763	2	0.034
rs112949659	a	g	-0.2272	0.0375	1.402e-09	---	0	1.019	2	0.6008
rs191743109	t	c	0.3954	0.0656	1.7e-09	+++	0	0.525	2	0.7693
rs117989696	t	c	-0.2978	0.0495	1.724e-09	---	0	1.135	2	0.567
rs113778921	t	c	-0.1585	0.0264	1.906e-09	---	54.5	4.397	2	0.1109
rs4808789	c	g	0.0779	0.013	2.009e-09	+++	73.9	7.674	2	0.02156
rs183851202	a	g	0.3512	0.0587	2.139e-09	+++	0	0.987	2	0.6104
rs73923175	t	c	-0.102	0.0171	2.336e-09	---	0	1.094	2	0.5786
rs11668079	t	c	-0.1265	0.0212	2.512e-09	---	75.6	8.195	2	0.01662
rs113630067	a	g	0.1819	0.0306	2.729e-09	+++	72.6	7.301	2	0.02598
rs180944657	a	g	0.2911	0.0491	3.17e-09	+++	0	1.282	2	0.5267
rs139562741	t	c	-0.4796	0.0815	4.07e-09	---	52.5	4.21	2	0.1219
rs8107264	a	g	0.0763	0.013	4.283e-09	+++	74.2	7.745	2	0.02081
rs1043063	t	c	-0.081	0.0138	4.684e-09	---	71.4	6.993	2	0.0303
rs112583951	a	g	0.2117	0.0363	5.24e-09	+++	0	1.838	2	0.3989
rs113700483	a	g	-0.1748	0.0302	6.786e-09	---	57.9	4.75	2	0.09303
rs188352043	t	c	0.405	0.07	7.406e-09	+++	34.7	3.064	2	0.2162
rs111445982	t	c	-0.2017	0.0354	1.179e-08	---	72.1	7.158	2	0.02791
rs117780632	a	g	-0.1466	0.0259	1.543e-08	---	55.1	4.454	2	0.1079
rs116875009	t	c	0.3235	0.0575	1.841e-08	+++	0	0.142	2	0.9312
rs57050736	t	c	0.4802	0.0856	2.034e-08	+++	50.3	4.027	2	0.1335
rs190546009	a	g	0.3727	0.0667	2.345e-08	+++	65.6	5.813	2	0.05468
rs543540068	a	g	0.4225	0.0762	2.969e-08	+++	39.4	3.298	2	0.1923
rs117938925	c	g	0.143	0.026	3.98e-08	+++	44.2	3.587	2	0.1664
rs76580597	t	c	-0.1381	0.0253	4.666e-08	---	63.1	5.425	2	0.06639
rs113377929	a	c	-0.1379	0.0252	4.671e-08	---	64.3	5.599	2	0.06085
rs112125416	a	g	0.1634	0.0299	4.789e-08	+++	55.9	4.535	2	0.1036

## Sheet: Table S3i
Supplementary Table S3i. Functional annotation of GDF15 meta-analysis fine mapped variants.
Variant	Freq	Allele	Gene	Consequence	Biotype
rs1054221	0.1	C	GDF15	3 prime UTR variant	protein_coding
		C	LRRC25	Downstream gene variant	protein_coding
		C	MIR3189	Downstream gene variant	miRNA
rs3787023	0.43	A or C	GDF15	Intron	protein_coding
		A or C	LRRC25	Downstream gene variant	protein_coding
		A or C	MIR3189	Downstream gene variant	miRNA
rs138515339	<0.01	A or T	CRTC1	Intron	protein_coding
rs141542836	0.02	T	GDF15	5 prime UTR variant	protein_coding
		T	LRRC25	Downstream gene variant	protein_coding
		T	MIR3189	Downtream gene variant	miRNA
Canonical transcripts only are shown. Results were obtained from Ensembl variant effect predictor. Frequencies were obtained from 1000 genomes.
