# Supplementary material for: Integrated analyses of growth differentiation factor-15 concentration and cardiometabolic diseases in humans
Source: eLife journal article supplement (doi:10.7554/elife.76272), 2022-08-02
Supplement: supp [file elife_poa_e76272_Supplementary_file_4.xlsx]

## Sheet: Table S4a
Supplementary Table S4a. Estimates and F-statistics for instrumental variables used in Mendelian randomisation assessment with GDF15 as the exposure (forward MR)
SNPs	Estimate	SE	F-statistic
rs111527728	0.26	0.037	49.7
rs113700483	0.17	0.03	33.5
rs1227734	0.5	0.017	847.4
rs150286074	0.13	0.021	37.8
rs73923175	0.1	0.017	35.6

## Sheet: Table S4b
Supplementary Table S4b. Weighted median Mendelian randomisation results for forward MR of GDF15 with cardiometabolic traits.
	Instruments	Estimate (SE)	P-valueFDR (raw)
BMI	5	-0.055 (0.0065)	0.71 (0.59)
WHR	5	0.015 (0.0055)	0.016 (0.0053)
Diabetes	5	0.011 (0.019)	0.71 (0.55)
Glucose	5	-0.00014 (0.0083)	0.99 (0.99)
HDL	5	-0.0082 (0.0024)	0.0045 (0.00075)
eBMD	5	0.0032 (0.0052)	0.71 (0.53)

## Sheet: Table S4c
Supplementary Table S4c. Estimates and F-statistics for instrumental variables used in Mendelian randomisation assessment of BMI with GDF15 as the outome (reverse MR)
SNP	Estimate	SE	F-statistic
rs10000502	0.0136	0.0018	57.0864
rs10002111	0.0125	0.0021	35.4308
rs10009336	0.0127	0.0022	33.3244
rs1000940	0.0152	0.0018	71.3086
rs10010217	0.0111	0.002	30.8025
rs10033843	0.014	0.0021	44.4444
rs1006896	0.0227	0.0027	70.6845
rs1009188	0.0124	0.0019	42.5928
rs10092723	0.0133	0.002	44.2225
rs10099330	0.0119	0.0017	49
rs10118866	0.0113	0.002	31.9225
rs10118878	0.0099	0.0017	33.9135
rs10132280	0.0214	0.0018	141.346
rs10135922	0.0108	0.0019	32.3102
rs10146527	0.0126	0.0017	54.9343
rs10169594	0.012	0.0018	44.4444
rs10182181	0.0327	0.0016	417.691
rs10192119	0.0151	0.0021	51.7029
rs10197031	0.0161	0.0019	71.8033
rs10198345	0.0109	0.0018	36.6698
rs10211196	0.012	0.0016	56.25
rs10236427	0.0123	0.0021	34.3061
rs10237317	0.0112	0.0017	43.4048
rs10263780	0.0159	0.0026	37.3979
rs10269783	0.0126	0.0017	54.9343
rs10275044	0.0127	0.0022	33.3244
rs1035010	0.0139	0.002	48.3025
rs1038088	0.0115	0.0016	51.6602
rs10402145	0.012	0.0019	39.8892
rs10431745	0.0199	0.0033	36.3646
rs10433609	0.0163	0.0022	54.8946
rs1045411	0.0139	0.0019	53.5208
rs10460960	0.0216	0.0025	74.6496
rs10471636	0.014	0.0017	67.8201
rs10483389	0.0334	0.0041	66.3629
rs10489219	0.0148	0.0027	30.0466
rs10489615	0.0099	0.0017	33.9135
rs10491182	0.02	0.0031	41.6233
rs10498767	0.0138	0.0017	65.8962
rs10499276	0.018	0.0024	56.25
rs10499320	0.0145	0.0025	33.64
rs10499694	0.013	0.0016	66.0156
rs10502880	0.0099	0.0017	33.9135
rs10506971	0.0142	0.0017	69.7716
rs10510419	0.0168	0.0023	53.3535
rs10668	0.0117	0.0017	47.3668
rs10733051	0.0093	0.0016	33.7852
rs10733682	0.0148	0.0016	85.5625
rs10741329	0.0115	0.0018	40.8179
rs10742752	0.0123	0.0017	52.3495
rs10744146	0.0113	0.0017	44.1834
rs10745785	0.0105	0.0018	34.0278
rs10747472	0.0153	0.0018	72.25
rs10757259	0.0113	0.002	31.9225
rs1075901	0.0118	0.0016	54.3906
rs10763587	0.0111	0.0019	34.1302
rs10764256	0.0118	0.0021	31.5737
rs10772055	0.0147	0.0023	40.8488
rs10779751	0.0131	0.0018	52.966
rs10786705	0.0099	0.0018	30.25
rs10788494	0.0132	0.0017	60.2907
rs10790482	0.0111	0.0018	38.0278
rs10798888	0.013	0.0022	34.9174
rs10813054	0.0145	0.0026	31.1021
rs10817191	0.0099	0.0017	33.9135
rs10818810	0.0131	0.0017	59.3806
rs10829164	0.0151	0.0024	39.5851
rs10840606	0.0146	0.0023	40.2949
rs108422	0.0112	0.0017	43.4048
rs10842240	0.0195	0.0025	60.84
rs10850777	0.0108	0.0017	40.3599
rs10858935	0.0104	0.0018	33.3827
rs10869977	0.0106	0.0017	38.8789
rs10883057	0.0127	0.0019	44.6787
rs10883553	0.0137	0.0017	64.9446
rs10886017	0.0146	0.0019	59.0471
rs10892873	0.0118	0.0018	42.9753
rs10894670	0.0096	0.0016	36
rs10915840	0.0108	0.0019	32.3102
rs10920678	0.0149	0.0016	86.7227
rs10923724	0.0126	0.0016	62.0156
rs10929925	0.0142	0.0016	78.7656
rs10930502	0.0128	0.0018	50.5679
rs10935143	0.0099	0.0017	33.9135
rs10937094	0.0116	0.0019	37.2742
rs10938397	0.0322	0.0016	405.016
rs10948634	0.0111	0.0017	42.6332
rs10962549	0.0201	0.0023	76.3724
rs10965780	0.0107	0.0017	39.6159
rs10971721	0.0201	0.0028	51.5319
rs10984756	0.0176	0.0028	39.5102
rs10990303	0.0112	0.002	31.36
rs10991925	0.0135	0.0019	50.4848
rs10992867	0.0162	0.0019	72.6981
rs11023948	0.0121	0.002	36.6025
rs11044430	0.0161	0.0023	49
rs11056875	0.0136	0.0024	32.1111
rs11066871	0.0224	0.0034	43.4048
rs11074446	0.0214	0.0024	79.5069
rs11075489	0.0116	0.0017	46.5606
rs11076022	0.0109	0.0016	46.4102
rs11084553	0.0195	0.0024	66.0156
rs11089885	0.0097	0.0017	32.5571
rs11105839	0.0113	0.0017	44.1834
rs11115176	0.0131	0.0019	47.5374
rs11118308	0.0098	0.0016	37.5156
rs11119208	0.0108	0.0017	40.3599
rs11121210	0.0111	0.0017	42.6332
rs11138313	0.0176	0.0028	39.5102
rs11150911	0.0118	0.0018	42.9753
rs11158434	0.0126	0.0021	36
rs11165643	0.0185	0.0016	133.691
rs11170468	0.013	0.0019	46.8144
rs11181001	0.0136	0.0016	72.25
rs1119950	0.0113	0.0019	35.3712
rs11208660	0.0196	0.0029	45.679
rs11246991	0.0145	0.0026	31.1021
rs11251352	0.0096	0.0017	31.8893
rs11264483	0.0138	0.0018	58.7778
rs1138714	0.0116	0.0017	46.5606
rs11538	0.0138	0.0023	36
rs11577094	0.0186	0.003	38.44
rs11577179	0.012	0.0017	49.827
rs1159974	0.011	0.0017	41.8685
rs11610122	0.0157	0.0028	31.4401
rs11611246	0.0223	0.002	124.323
rs11614340	0.0117	0.0018	42.25
rs11615578	0.0117	0.002	34.2225
rs11629783	0.0143	0.002	51.1225
rs11633626	0.0157	0.0018	76.0772
rs11635675	0.0123	0.0018	46.6944
rs11636611	0.0104	0.0017	37.4256
rs11638950	0.0107	0.0017	39.6159
rs11649864	0.0192	0.003	40.96
rs11652146	0.0098	0.0017	33.2318
rs11659764	0.0272	0.0039	48.6417
rs11672339	0.0098	0.0017	33.2318
rs11672660	0.0338	0.0021	259.057
rs11681570	0.0115	0.0018	40.8179
rs1169091	0.0106	0.0019	31.1247
rs11692326	0.0147	0.0019	59.8587
rs11702843	0.0121	0.002	36.6025
rs11708733	0.024	0.0041	34.2653
rs11713193	0.0246	0.0017	209.398
rs11721261	0.0135	0.0019	50.4848
rs11724872	0.0095	0.0016	35.2539
rs11739877	0.0116	0.0018	41.5309
rs11753875	0.0111	0.0017	42.6332
rs11754747	0.0123	0.0019	41.9086
rs11757081	0.0156	0.002	60.84
rs11757278	0.0133	0.0019	49
rs1176871	0.018	0.0031	33.7149
rs11773362	0.0105	0.0018	34.0278
rs11781222	0.0167	0.0024	48.4184
rs11781699	0.0141	0.0021	45.0816
rs11782074	0.0124	0.0018	47.4568
rs11790280	0.0102	0.0017	36
rs11792069	0.014	0.0023	37.051
rs11855853	0.0161	0.002	64.8025
rs11866815	0.0153	0.0019	64.8449
rs1187352	0.012	0.0018	44.4444
rs11884795	0.0112	0.0018	38.716
rs11902450	0.0167	0.0027	38.2565
rs11915371	0.0154	0.0021	53.7778
rs11917965	0.011	0.0017	41.8685
rs11924032	0.0151	0.0018	70.3735
rs11925138	0.0216	0.0029	55.4768
rs11931941	0.0125	0.002	39.0625
rs11971098	0.0196	0.003	42.6844
rs11973097	0.023	0.004	33.0625
rs1199334	0.0145	0.0021	47.6757
rs12022461	0.0167	0.0022	57.6219
rs12035149	0.0134	0.0021	40.7166
rs12042959	0.0153	0.0024	40.6406
rs12055154	0.0322	0.0054	35.5569
rs12062845	0.0151	0.0021	51.7029
rs12086884	0.0108	0.002	29.16
rs12098284	0.0184	0.0026	50.0828
rs12147845	0.0187	0.0027	47.9684
rs12150665	0.0168	0.0016	110.25
rs12189178	0.0348	0.0046	57.2325
rs12210292	0.0117	0.002	34.2225
rs12238336	0.0121	0.0017	50.6609
rs12259464	0.0109	0.0017	41.1107
rs1227932	0.0097	0.0018	29.0401
rs12286929	0.0177	0.0016	122.379
rs1229057	0.0155	0.0027	32.9561
rs12316047	0.0174	0.002	75.69
rs12321197	0.0286	0.0049	34.0675
rs12328778	0.0215	0.0032	45.1416
rs12334435	0.0101	0.0018	31.4846
rs12364470	0.0187	0.0022	72.25
rs12369179	0.034	0.0031	120.291
rs12380880	0.0114	0.002	32.49
rs12413409	0.0267	0.0029	84.7669
rs12420725	0.0222	0.0037	36
rs12422552	0.0131	0.0019	47.5374
rs12429545	0.0313	0.0024	170.085
rs12439798	0.0127	0.0017	55.8097
rs12446632	0.0353	0.0024	216.335
rs12448257	0.0161	0.002	64.8025
rs12449219	0.0164	0.0026	39.787
rs12454712	0.0136	0.0018	57.0864
rs12462975	0.0193	0.0018	114.966
rs12468863	0.0148	0.0016	85.5625
rs12476772	0.0122	0.0018	45.9383
rs12477088	0.0142	0.0017	69.7716
rs12477385	0.0139	0.002	48.3025
rs12488237	0.0225	0.0036	39.0625
rs1249156	0.0102	0.0019	28.8199
rs12509234	0.0116	0.0019	37.2742
rs12519652	0.0097	0.0017	32.5571
rs12530737	0.0137	0.0019	51.9917
rs12546331	0.0108	0.0017	40.3599
rs12564992	0.0189	0.0026	52.8417
rs12566985	0.0194	0.0016	147.016
rs12594043	0.0102	0.0017	36
rs12595158	0.0382	0.0052	53.966
rs12595749	0.0131	0.0017	59.3806
rs12602912	0.0166	0.002	68.89
rs1260326	0.0107	0.0017	39.6159
rs12608738	0.0127	0.0019	44.6787
rs12609744	0.0112	0.0019	34.7479
rs12615199	0.012	0.0021	32.6531
rs12628051	0.0161	0.0018	80.0031
rs12628891	0.0115	0.0019	36.6343
rs12633819	0.0095	0.0017	31.2284
rs12635553	0.0099	0.0017	33.9135
rs1263627	0.013	0.002	42.25
rs12675063	0.0158	0.0025	39.9424
rs12680842	0.0142	0.0017	69.7716
rs12681792	0.015	0.0021	51.0204
rs12692596	0.012	0.0017	49.827
rs12692738	0.0131	0.0019	47.5374
rs12714199	0.0141	0.0017	68.7924
rs1275691	0.0091	0.0016	32.3477
rs12765914	0.0226	0.0031	53.1488
rs12776880	0.0109	0.0019	32.9114
rs1277733	0.012	0.002	36
rs1285245	0.0106	0.0018	34.679
rs12868881	0.0138	0.0017	65.8962
rs12879626	0.0099	0.0017	33.9135
rs12885454	0.018	0.0017	112.111
rs12899905	0.0113	0.0018	39.4105
rs12914623	0.0159	0.0019	70.0305
rs12922346	0.0133	0.002	44.2225
rs12933086	0.0106	0.0019	31.1247
rs12939549	0.018	0.0016	126.562
rs1296328	0.0166	0.0017	95.3495
rs12971734	0.0211	0.0038	30.8317
rs12979351	0.0177	0.0032	30.5947
rs12981256	0.0151	0.0017	78.8962
rs12994080	0.0098	0.0018	29.642
rs13001304	0.0108	0.0019	32.3102
rs13021737	0.0578	0.0021	757.56
rs13047416	0.0152	0.0018	71.3086
rs13053342	0.0125	0.0018	48.2253
rs13062093	0.0122	0.0017	51.5017
rs13078509	0.0345	0.0057	36.6343
rs13107325	0.0468	0.0032	213.891
rs13110266	0.0124	0.0016	60.0625
rs13163306	0.0104	0.0017	37.4256
rs1316369	0.0104	0.0018	33.3827
rs13174863	0.0197	0.0023	73.3629
rs1318241	0.0123	0.0022	31.2583
rs13182474	0.0149	0.0018	68.5216
rs13191362	0.0235	0.0025	88.36
rs13206405	0.0122	0.0021	33.7506
rs13209872	0.0148	0.0018	67.6049
rs13238568	0.0134	0.0018	55.4198
rs13240600	0.018	0.0022	66.9421
rs1324110	0.0097	0.0016	36.7539
rs13245051	0.015	0.0017	77.8547
rs13263601	0.0145	0.0018	64.892
rs13266989	0.0104	0.0017	37.4256
rs13292270	0.0131	0.0022	35.4566
rs13299788	0.0148	0.0023	41.4064
rs1330052	0.0137	0.0018	57.929
rs13303360	0.0137	0.0024	32.5851
rs1335126	0.0111	0.002	30.8025
rs13417156	0.0135	0.0017	63.0623
rs13432055	0.0117	0.0018	42.25
rs1343604	0.013	0.0022	34.9174
rs1346841	0.0126	0.0017	54.9343
rs1356506	0.0137	0.0018	57.929
rs1358980	0.0129	0.0017	57.5813
rs1363695	0.0125	0.002	39.0625
rs1365466	0.012	0.0018	44.4444
rs1383592	0.0122	0.0021	33.7506
rs1394879	0.011	0.0017	41.8685
rs1400759	0.0101	0.0018	31.4846
rs1402025	0.0117	0.002	34.2225
rs1409818	0.0195	0.0028	48.5013
rs1412235	0.0237	0.0017	194.356
rs1417665	0.0186	0.0022	71.4793
rs1420341	0.0133	0.0022	36.5475
rs1421334	0.0135	0.0017	63.0623
rs1430387	0.0122	0.0017	51.5017
rs1431659	0.0191	0.0019	101.055
rs1436344	0.0147	0.0017	74.7716
rs1437842	0.0106	0.0017	38.8789
rs1441264	0.0174	0.0017	104.761
rs1452075	0.0128	0.0018	50.5679
rs1454687	0.0185	0.0017	118.426
rs1461527	0.0106	0.0019	31.1247
rs1477023	0.0111	0.002	30.8025
rs1477199	0.0221	0.0023	92.327
rs1477890	0.0128	0.0017	56.692
rs1487139	0.0094	0.0017	30.5744
rs1491333	0.0107	0.0019	31.7147
rs1491797	0.0116	0.0018	41.5309
rs1492767	0.0095	0.0016	35.2539
rs1501673	0.0289	0.0025	133.634
rs1522569	0.0141	0.0022	41.0764
rs1523768	0.0126	0.0017	54.9343
rs1544459	0.01	0.0016	39.0625
rs1546924	0.0139	0.0016	75.4727
rs1547874	0.0152	0.0022	47.7355
rs1554194	0.0105	0.0017	38.1488
rs1557765	0.0122	0.0017	51.5017
rs1559677	0.0115	0.0016	51.6602
rs1582931	0.0126	0.0017	54.9343
rs1584121	0.0119	0.0021	32.1111
rs1624064	0.0105	0.0017	38.1488
rs1624134	0.01	0.0017	34.6021
rs1634350	0.0114	0.0017	44.9689
rs1658820	0.0132	0.002	43.56
rs16825005	0.0124	0.0018	47.4568
rs16826068	0.0177	0.0023	59.2231
rs16851483	0.0352	0.0034	107.183
rs16864515	0.0192	0.0029	43.8335
rs16867703	0.0146	0.0018	65.7901
rs16906845	0.0244	0.0036	45.9383
rs16907751	0.0194	0.0029	44.7515
rs16916303	0.0145	0.0026	31.1021
rs16952465	0.0389	0.0054	51.8933
rs16965225	0.022	0.0033	44.4444
rs16978350	0.0128	0.0019	45.385
rs16982345	0.0118	0.002	34.81
rs16989232	0.0115	0.0017	45.7612
rs1700082	0.0094	0.0017	30.5744
rs17014375	0.0165	0.0025	43.56
rs17019336	0.0128	0.0019	45.385
rs17024393	0.0644	0.0049	172.735
rs17025272	0.0125	0.0017	54.0657
rs17070611	0.0334	0.0061	29.9801
rs1707322	0.0136	0.0018	57.0864
rs17094222	0.0173	0.002	74.8225
rs17096510	0.0141	0.0025	31.8096
rs17114036	0.0158	0.0028	31.8418
rs17189185	0.0097	0.0018	29.0401
rs17193211	0.0209	0.0035	35.658
rs17201143	0.0112	0.0018	38.716
rs17207196	0.022	0.0017	167.474
rs1721447	0.01	0.0017	34.6021
rs17236194	0.0154	0.0023	44.8318
rs17272434	0.0097	0.0018	29.0401
rs17283867	0.0105	0.0018	34.0278
rs1730859	0.012	0.0017	49.827
rs17327461	0.0122	0.0016	58.1406
rs17386402	0.0095	0.0017	31.2284
rs17391694	0.032	0.0025	163.84
rs17405819	0.0211	0.0018	137.41
rs17425707	0.0173	0.0028	38.1747
rs17446091	0.0127	0.002	40.3225
rs17448885	0.0105	0.0018	34.0278
rs17522122	0.0167	0.0017	96.5017
rs17535749	0.0159	0.0027	34.679
rs17551974	0.0127	0.0022	33.3244
rs17574378	0.014	0.0019	54.2936
rs17609108	0.0152	0.0024	40.1111
rs17636031	0.0154	0.0018	73.1975
rs17681451	0.0225	0.0031	52.6795
rs17681708	0.0105	0.0018	34.0278
rs17695092	0.0114	0.0018	40.1111
rs17724992	0.0172	0.0018	91.3086
rs17739702	0.017	0.0031	30.0728
rs17744796	0.0132	0.0024	30.25
rs17757975	0.0155	0.0024	41.7101
rs17789218	0.0111	0.0019	34.1302
rs17805532	0.024	0.0037	42.0745
rs17806224	0.026	0.0022	139.669
rs17808606	0.0117	0.002	34.2225
rs1790376	0.013	0.0017	58.4775
rs1814170	0.018	0.0028	41.3265
rs1821588	0.0111	0.0019	34.1302
rs1823084	0.0133	0.0024	30.7101
rs1837269	0.015	0.0017	77.8547
rs1852006	0.0153	0.0018	72.25
rs1871329	0.0131	0.002	42.9025
rs1874129	0.0137	0.0025	30.0304
rs1877875	0.0109	0.0017	41.1107
rs1879319	0.0133	0.0017	61.2076
rs1881505	0.022	0.0039	31.8212
rs1884389	0.0108	0.0017	40.3599
rs1884897	0.0184	0.0017	117.149
rs1885728	0.01	0.0018	30.8642
rs1891215	0.0111	0.0017	42.6332
rs1896124	0.0101	0.0018	31.4846
rs1899689	0.012	0.0017	49.827
rs1899898	0.0107	0.0018	35.3364
rs1903579	0.0108	0.0017	40.3599
rs1911746	0.0113	0.0019	35.3712
rs191692	0.0097	0.0017	32.5571
rs1927790	0.014	0.0016	76.5625
rs1928295	0.0134	0.0016	70.1406
rs1929395	0.0095	0.0017	31.2284
rs1933437	0.0143	0.0017	70.7578
rs1935477	0.0099	0.0017	33.9135
rs1941697	0.0122	0.0017	51.5017
rs194809	0.0126	0.0022	32.8017
rs1951455	0.0148	0.0019	60.6759
rs1958898	0.0146	0.0021	48.3356
rs1967772	0.0173	0.0019	82.9058
rs1982441	0.017	0.0025	46.24
rs198448	0.01	0.0017	34.6021
rs1990573	0.0129	0.0018	51.3611
rs1993414	0.0189	0.0034	30.9005
rs2007518	0.013	0.0017	58.4775
rs2009416	0.0119	0.0018	43.7068
rs2010281	0.0155	0.0017	83.1315
rs2012502	0.0119	0.0017	49
rs2012927	0.0144	0.0017	71.7509
rs2024765	0.0095	0.0017	31.2284
rs2029085	0.0154	0.0027	32.5322
rs2035831	0.0102	0.0018	32.1111
rs2038656	0.0129	0.002	41.6025
rs2044469	0.0133	0.0018	54.5957
rs2045293	0.014	0.0017	67.8201
rs2046364	0.0116	0.0021	30.5125
rs2051559	0.0167	0.0025	44.6224
rs2053682	0.017	0.0018	89.1975
rs2054117	0.0098	0.0017	33.2318
rs2058527	0.0115	0.0019	36.6343
rs2064044	0.0123	0.0021	34.3061
rs2065418	0.0139	0.0018	59.6327
rs2074613	0.0115	0.0017	45.7612
rs208015	0.0352	0.0033	113.778
rs2081493	0.0112	0.0018	38.716
rs2094474	0.0105	0.0019	30.5402
rs2100814	0.0109	0.0017	41.1107
rs2107118	0.0111	0.0018	38.0278
rs2111386	0.0119	0.002	35.4025
rs2111877	0.0135	0.0024	31.6406
rs2112347	0.0276	0.0017	263.585
rs2119753	0.01	0.0017	34.6021
rs2124499	0.0115	0.0017	45.7612
rs2134858	0.0117	0.0017	47.3668
rs2138062	0.0126	0.0022	32.8017
rs2143624	0.0094	0.0017	30.5744
rs2155645	0.0114	0.0019	36
rs2155869	0.0125	0.0022	32.2831
rs215669	0.0149	0.0017	76.8201
rs2163188	0.0138	0.0017	65.8962
rs2166171	0.0103	0.0018	32.7438
rs2170382	0.0177	0.0027	42.9753
rs217433	0.0115	0.0021	29.9887
rs217671	0.015	0.0019	62.3269
rs2185027	0.015	0.0018	69.4444
rs2190788	0.0135	0.0018	56.25
rs2192158	0.0137	0.0017	64.9446
rs2195086	0.014	0.0023	37.051
rs2196618	0.0137	0.0019	51.9917
rs2206277	0.0408	0.0021	377.469
rs2228213	0.0144	0.0017	71.7509
rs2229616	0.1051	0.0059	317.323
rs2229768	0.0134	0.0019	49.7396
rs2237403	0.0128	0.0018	50.5679
rs2238799	0.0102	0.0018	32.1111
rs2241423	0.0298	0.0019	245.994
rs2241743	0.0106	0.0016	43.8906
rs2245368	0.0238	0.0023	107.078
rs2246012	0.0161	0.0022	53.5558
rs2252152	0.0096	0.0017	31.8893
rs2255248	0.0102	0.0016	40.6406
rs2256216	0.0104	0.0018	33.3827
rs225883	0.0138	0.0024	33.0625
rs226688	0.0115	0.0017	45.7612
rs2269828	0.0097	0.0018	29.0401
rs2271189	0.0141	0.0018	61.3611
rs2271928	0.0102	0.0016	40.6406
rs2279620	0.0161	0.0028	33.0625
rs2283006	0.0132	0.0017	60.2907
rs2283093	0.0121	0.0021	33.1995
rs2289379	0.0137	0.0018	57.929
rs2299383	0.0162	0.0016	102.516
rs2304130	0.017	0.0029	34.3639
rs2322622	0.0098	0.0017	33.2318
rs2341028	0.0102	0.0019	28.8199
rs2346882	0.0138	0.0018	58.7778
rs2357760	0.0143	0.0017	70.7578
rs2365389	0.0168	0.0016	110.25
rs2371767	0.0107	0.0018	35.3364
rs2396625	0.0176	0.0017	107.183
rs2400414	0.0126	0.0018	49
rs2404815	0.011	0.0017	41.8685
rs2423668	0.0106	0.0018	34.679
rs2425840	0.0119	0.0017	49
rs2434467	0.012	0.0018	44.4444
rs2436728	0.0189	0.0017	123.602
rs2439823	0.0165	0.0017	94.2042
rs2447832	0.0109	0.0017	41.1107
rs2466103	0.0121	0.0018	45.1883
rs2470397	0.0128	0.0022	33.8512
rs2478879	0.0169	0.0017	98.827
rs2479958	0.0129	0.0018	51.3611
rs2481665	0.0161	0.0016	101.254
rs2488397	0.0116	0.0021	30.5125
rs2489676	0.0095	0.0017	31.2284
rs2503185	0.013	0.0017	58.4775
rs2512885	0.0119	0.0016	55.3164
rs2516739	0.0153	0.002	58.5225
rs252749	0.0112	0.002	31.36
rs2542615	0.0112	0.0018	38.716
rs2543132	0.0139	0.0021	43.8118
rs2554414	0.0113	0.0019	35.3712
rs2577947	0.0135	0.0022	37.655
rs2605603	0.0103	0.0016	41.4414
rs2616192	0.0128	0.0018	50.5679
rs2619976	0.0105	0.0018	34.0278
rs2622274	0.0107	0.0017	39.6159
rs262255	0.0096	0.0017	31.8893
rs2631681	0.0103	0.0017	36.7093
rs264941	0.0124	0.0017	53.2042
rs26545	0.0107	0.0018	35.3364
rs2670854	0.0111	0.0019	34.1302
rs2680648	0.0159	0.002	63.2025
rs2682406	0.0126	0.0017	54.9343
rs2685263	0.0102	0.0016	40.6406
rs2707183	0.0093	0.0017	29.9273
rs2715423	0.0115	0.0019	36.6343
rs2717926	0.01	0.0017	34.6021
rs2718786	0.0115	0.0017	45.7612
rs27218	0.0133	0.0019	49
rs2734741	0.0184	0.0025	54.1696
rs273504	0.0156	0.0017	84.2076
rs2744974	0.0261	0.0017	235.713
rs274628	0.0102	0.0018	32.1111
rs2768950	0.012	0.0018	44.4444
rs2777768	0.0119	0.0019	39.2271
rs2803316	0.0142	0.0017	69.7716
rs2820295	0.0235	0.0018	170.448
rs2832283	0.0115	0.002	33.0625
rs28350	0.0172	0.0022	61.124
rs2836961	0.0103	0.0017	36.7093
rs2837398	0.0112	0.0017	43.4048
rs2838006	0.0132	0.0018	53.7778
rs284227	0.0147	0.0019	59.8587
rs284262	0.0104	0.0017	37.4256
rs2848763	0.0139	0.0025	30.9136
rs2850974	0.0164	0.0024	46.6944
rs2861089	0.0105	0.0017	38.1488
rs2862996	0.0216	0.0017	161.439
rs2870710	0.0155	0.0022	49.6384
rs2890652	0.0158	0.0023	47.1909
rs2891403	0.0116	0.0018	41.5309
rs2907948	0.0145	0.0019	58.241
rs2954021	0.0107	0.0017	39.6159
rs2959592	0.0141	0.002	49.7025
rs2964009	0.0105	0.0016	43.0664
rs2973157	0.0112	0.0021	28.4444
rs2984618	0.0165	0.0016	106.348
rs29938	0.0158	0.0017	86.3806
rs3019466	0.0128	0.0024	28.4444
rs3019643	0.0107	0.0019	31.7147
rs3092209	0.0101	0.0017	35.2976
rs3101336	0.0254	0.0016	252.016
rs312750	0.0097	0.0016	36.7539
rs3128365	0.0101	0.0018	31.4846
rs3134358	0.0122	0.0018	45.9383
rs3209570	0.0145	0.0017	72.7509
rs323742	0.0394	0.0054	53.2359
rs325220	0.0106	0.0018	34.679
rs326205	0.0095	0.0017	31.2284
rs326893	0.0121	0.0017	50.6609
rs329124	0.0135	0.0017	63.0623
rs329651	0.016	0.0021	58.0499
rs340025	0.0127	0.0016	63.0039
rs349088	0.013	0.0017	58.4775
rs35321	0.0119	0.0019	39.2271
rs355777	0.0151	0.0017	78.8962
rs35623600	0.0122	0.002	37.21
rs3730074	0.0133	0.0024	30.7101
rs3744017	0.0139	0.0022	39.9194
rs3750944	0.0103	0.0018	32.7438
rs3752904	0.0116	0.0016	52.5625
rs3764002	0.0105	0.0019	30.5402
rs3764625	0.0096	0.0017	31.8893
rs3766160	0.0107	0.0018	35.3364
rs3770799	0.0114	0.0018	40.1111
rs3772934	0.0107	0.0019	31.7147
rs3796795	0.0152	0.0024	40.1111
rs3803286	0.0178	0.0018	97.7901
rs3806114	0.012	0.0018	44.4444
rs3808434	0.0115	0.0016	51.6602
rs3808477	0.0182	0.0019	91.7562
rs3810291	0.0262	0.0017	237.522
rs3811514	0.0104	0.0017	37.4256
rs3814883	0.0227	0.0017	178.301
rs3822683	0.0131	0.002	42.9025
rs3825061	0.014	0.0017	67.8201
rs3825393	0.0102	0.0017	36
rs3826705	0.0148	0.0027	30.0466
rs3829849	0.0099	0.0017	33.9135
rs3844598	0.0096	0.0017	31.8893
rs3846783	0.0146	0.0025	34.1056
rs3849570	0.0134	0.0017	62.1315
rs3850422	0.0112	0.0016	49
rs3862266	0.0103	0.0019	29.3878
rs3902951	0.0134	0.0019	49.7396
rs3914628	0.0165	0.0023	51.465
rs3915844	0.0143	0.0025	32.7184
rs3919949	0.0117	0.0018	42.25
rs3922853	0.013	0.0022	34.9174
rs3922980	0.0127	0.0017	55.8097
rs3923783	0.0222	0.0022	101.826
rs3930349	0.014	0.002	49
rs39654	0.0163	0.0017	91.9343
rs400277	0.0097	0.0017	32.5571
rs40067	0.0252	0.0023	120.045
rs4017425	0.0118	0.0017	48.1799
rs40245	0.0104	0.0018	33.3827
rs4076427	0.014	0.0018	60.4938
rs4097319	0.0107	0.0017	39.6159
rs4148155	0.0192	0.0026	54.5325
rs4240673	0.0175	0.0016	119.629
rs4256980	0.0187	0.0017	121
rs4278019	0.0104	0.0019	29.9612
rs427943	0.0177	0.0017	108.405
rs429343	0.0146	0.0017	73.7578
rs4303732	0.0169	0.0017	98.827
rs4307239	0.0115	0.0017	45.7612
rs4308812	0.0107	0.0018	35.3364
rs4349008	0.0204	0.0037	30.3988
rs4372836	0.0125	0.0017	54.0657
rs4382152	0.0104	0.0017	37.4256
rs4444317	0.0137	0.0021	42.5601
rs4450749	0.0136	0.0024	32.1111
rs4480977	0.009	0.0016	31.6406
rs4482463	0.031	0.0031	100
rs4483850	0.0153	0.0017	81
rs4509057	0.01	0.0017	34.6021
rs4514364	0.0186	0.0018	106.778
rs4517716	0.0117	0.002	34.2225
rs4523610	0.0108	0.002	29.16
rs455527	0.0194	0.0034	32.5571
rs459552	0.0133	0.0019	49
rs4600855	0.0107	0.0018	35.3364
rs4619804	0.0114	0.0019	36
rs4639527	0.0161	0.0018	80.0031
rs4653942	0.0113	0.002	31.9225
rs4655141	0.0173	0.0022	61.8368
rs4671328	0.0214	0.0017	158.464
rs4672	0.0229	0.0032	51.2119
rs4676084	0.0107	0.0017	39.6159
rs4682718	0.0143	0.0022	42.25
rs4683096	0.0113	0.0017	44.1834
rs4700608	0.0155	0.0017	83.1315
rs4703019	0.0102	0.0016	40.6406
rs4740383	0.0131	0.0018	52.966
rs4740619	0.0189	0.0016	139.535
rs4759075	0.0118	0.0016	54.3906
rs4771561	0.0098	0.0017	33.2318
rs477805	0.0134	0.0021	40.7166
rs4794015	0.016	0.0017	88.5813
rs4795195	0.0113	0.0019	35.3712
rs4805525	0.0129	0.002	41.6025
rs4807179	0.0138	0.0018	58.7778
rs4808934	0.0175	0.0022	63.2748
rs4813619	0.0106	0.0018	34.679
rs4814512	0.0126	0.0021	36
rs4834272	0.0108	0.0017	40.3599
rs4844686	0.0096	0.0017	31.8893
rs4855789	0.01	0.0018	30.8642
rs4858193	0.0133	0.0019	49
rs4864201	0.0137	0.0017	64.9446
rs4865796	0.0096	0.0018	28.4444
rs487152	0.0108	0.0016	45.5625
rs4878458	0.0127	0.0022	33.3244
rs4880341	0.013	0.0017	58.4775
rs4889606	0.0209	0.0017	151.145
rs4895231	0.0121	0.0017	50.6609
rs4900714	0.015	0.0017	77.8547
rs4902865	0.014	0.0023	37.051
rs4911382	0.0127	0.0017	55.8097
rs4911442	0.0143	0.0024	35.5017
rs4912652	0.0098	0.0017	33.2318
rs4969071	0.0096	0.0017	31.8893
rs4970712	0.014	0.002	49
rs4973618	0.0148	0.0018	67.6049
rs4985155	0.0102	0.0017	36
rs4985526	0.0126	0.0017	54.9343
rs4986044	0.0177	0.0016	122.379
rs4988235	0.0124	0.0017	53.2042
rs500216	0.0097	0.0018	29.0401
rs535533	0.0103	0.0017	36.7093
rs543874	0.0479	0.002	573.602
rs559267	0.0103	0.0017	36.7093
rs564649	0.0111	0.0019	34.1302
rs570463	0.0121	0.0018	45.1883
rs5742914	0.0175	0.0027	42.0096
rs580809	0.0106	0.0019	31.1247
rs592483	0.0137	0.0017	64.9446
rs594821	0.0191	0.003	40.5344
rs6010784	0.0106	0.0016	43.8906
rs6014523	0.0134	0.0021	40.7166
rs6019483	0.0175	0.0023	57.8922
rs6023633	0.013	0.0021	38.322
rs6056413	0.0125	0.0022	32.2831
rs6075658	0.0097	0.0017	32.5571
rs6130360	0.0162	0.0024	45.5625
rs6136033	0.0095	0.0017	31.2284
rs621042	0.0103	0.0017	36.7093
rs621701	0.0273	0.0035	60.84
rs6265	0.0413	0.0021	386.778
rs630602	0.0126	0.0018	49
rs6419734	0.0161	0.0024	45.0017
rs6425819	0.0103	0.0018	32.7438
rs6443750	0.0152	0.0021	52.39
rs6448587	0.0156	0.0022	50.281
rs6448733	0.0127	0.0018	49.7809
rs6461115	0.0134	0.0019	49.7396
rs6463489	0.0167	0.0026	41.2559
rs6468188	0.0093	0.0016	33.7852
rs6468266	0.0113	0.0017	44.1834
rs6469351	0.0111	0.0018	38.0278
rs6476617	0.0149	0.0017	76.8201
rs6477694	0.0126	0.0017	54.9343
rs6480023	0.0108	0.0019	32.3102
rs6493498	0.0137	0.0016	73.3164
rs6497676	0.0101	0.0017	35.2976
rs6500208	0.0146	0.002	53.29
rs650198	0.0137	0.0019	51.9917
rs6512302	0.0134	0.002	44.89
rs651548	0.0146	0.0018	65.7901
rs6539064	0.0194	0.0019	104.255
rs6545714	0.0194	0.0016	147.016
rs6546496	0.0103	0.0017	36.7093
rs6548221	0.0145	0.002	52.5625
rs6556301	0.0113	0.0017	44.1834
rs6561766	0.0175	0.0027	42.0096
rs6567160	0.0552	0.0019	844.055
rs6573463	0.0101	0.0017	35.2976
rs6574100	0.0118	0.0017	48.1799
rs657452	0.0188	0.0016	138.062
rs6577584	0.0118	0.0018	42.9753
rs6583305	0.0105	0.0018	34.0278
rs6587552	0.0157	0.002	61.6225
rs6591407	0.0124	0.0021	34.8662
rs6594734	0.0124	0.0021	34.8662
rs6598540	0.0118	0.0021	31.5737
rs6602411	0.0147	0.0022	44.6467
rs6606686	0.0156	0.0017	84.2076
rs6607337	0.0124	0.0019	42.5928
rs6656934	0.0144	0.0026	30.6746
rs6661316	0.012	0.0016	56.25
rs6663115	0.0105	0.0018	34.0278
rs6696828	0.012	0.0018	44.4444
rs6700816	0.0346	0.005	47.8864
rs6707827	0.0105	0.0019	30.5402
rs6710871	0.0193	0.0024	64.6684
rs6713781	0.0126	0.0017	54.9343
rs6720868	0.0154	0.0018	73.1975
rs6725931	0.0187	0.0024	60.7101
rs6733834	0.015	0.0021	51.0204
rs6759670	0.012	0.0019	39.8892
rs6777784	0.0102	0.0018	32.1111
rs6785669	0.0116	0.0017	46.5606
rs680071	0.0154	0.0026	35.0828
rs6804181	0.0141	0.0023	37.5822
rs6804842	0.0141	0.0016	77.6602
rs6809307	0.0139	0.0019	53.5208
rs6818414	0.01	0.0017	34.6021
rs6819344	0.0102	0.0016	40.6406
rs6843738	0.0103	0.0017	36.7093
rs684639	0.0098	0.0017	33.2318
rs6849518	0.0177	0.0026	46.3447
rs6857	0.0246	0.0023	114.397
rs6870983	0.0208	0.0019	119.845
rs6879326	0.0095	0.0017	31.2284
rs6881013	0.0104	0.0018	33.3827
rs6886740	0.0114	0.0018	40.1111
rs6888194	0.0127	0.0023	30.4896
rs6890310	0.0119	0.0019	39.2271
rs6901756	0.0141	0.0024	34.5156
rs6904716	0.0095	0.0016	35.2539
rs6916553	0.0121	0.002	36.6025
rs6931385	0.0111	0.0017	42.6332
rs693701	0.0108	0.0019	32.3102
rs6968554	0.0107	0.0017	39.6159
rs698147	0.0116	0.0017	46.5606
rs698838	0.0127	0.0018	49.7809
rs6991323	0.0099	0.0018	30.25
rs7024334	0.0135	0.002	45.5625
rs7025938	0.0162	0.0018	81
rs7031064	0.011	0.0017	41.8685
rs7040498	0.0132	0.0024	30.25
rs7042372	0.0115	0.0018	40.8179
rs7043482	0.0097	0.0017	32.5571
rs7075347	0.0226	0.0035	41.6947
rs7083450	0.0165	0.0022	56.25
rs7084454	0.0198	0.0018	121
rs7102454	0.0168	0.0018	87.1111
rs7123876	0.0118	0.0019	38.5706
rs7124681	0.0257	0.0016	258.004
rs7133378	0.0127	0.0017	55.8097
rs7134628	0.0168	0.0028	36
rs7138803	0.0297	0.0017	305.221
rs7141307	0.0141	0.002	49.7025
rs7144011	0.0263	0.002	172.923
rs715	0.0157	0.0019	68.2798
rs7161194	0.019	0.0019	100
rs7164727	0.0171	0.0017	101.18
rs7172627	0.0114	0.0017	44.9689
rs7180542	0.012	0.0022	29.7521
rs7181610	0.0146	0.0025	34.1056
rs7186893	0.0143	0.0019	56.6454
rs7189122	0.0146	0.0022	44.0413
rs7195386	0.0129	0.0017	57.5813
rs719802	0.0106	0.0017	38.8789
rs7206608	0.013	0.0018	52.1605
rs7217226	0.0137	0.0017	64.9446
rs7219230	0.0113	0.0018	39.4105
rs722122	0.0164	0.002	67.24
rs7239114	0.012	0.0017	49.827
rs7243357	0.0198	0.0021	88.898
rs7254892	0.0265	0.0046	33.1876
rs7255223	0.0109	0.0019	32.9114
rs7258722	0.02	0.0017	138.408
rs730560	0.0098	0.0017	33.2318
rs7306544	0.0142	0.0026	29.8284
rs7357754	0.012	0.0017	49.827
rs737185	0.0137	0.0021	42.5601
rs7374289	0.0092	0.0016	33.0625
rs738140	0.0129	0.0018	51.3611
rs740157	0.0118	0.0016	54.3906
rs7498665	0.0285	0.0017	281.055
rs7500305	0.0122	0.0021	33.7506
rs750090	0.0113	0.0018	39.4105
rs7512146	0.0097	0.0017	32.5571
rs7523668	0.0105	0.0017	38.1488
rs7534091	0.012	0.0018	44.4444
rs7535528	0.0154	0.0018	73.1975
rs7547843	0.0186	0.0033	31.7686
rs7560871	0.0219	0.0034	41.4888
rs7561278	0.0169	0.0021	64.7642
rs756717	0.0134	0.0017	62.1315
rs7568228	0.0104	0.0017	37.4256
rs7575118	0.014	0.0024	34.0278
rs7580766	0.0094	0.0017	30.5744
rs7581217	0.0114	0.0018	40.1111
rs7588437	0.0165	0.0017	94.2042
rs7590444	0.0111	0.002	30.8025
rs7599312	0.0182	0.0018	102.235
rs7601895	0.0152	0.0018	71.3086
rs7607369	0.0121	0.0016	57.1914
rs761423	0.0105	0.0017	38.1488
rs7621025	0.0187	0.0019	96.867
rs7621331	0.0095	0.0017	31.2284
rs7631156	0.0215	0.0018	142.67
rs7640424	0.0135	0.0018	56.25
rs7647242	0.0129	0.0017	57.5813
rs765248	0.0113	0.0017	44.1834
rs765787	0.0137	0.0023	35.4802
rs765875	0.0132	0.0017	60.2907
rs767943	0.0109	0.0019	32.9114
rs768023	0.0161	0.0016	101.254
rs7683836	0.0099	0.0017	33.9135
rs7685048	0.0101	0.0017	35.2976
rs7685628	0.0101	0.0017	35.2976
rs768840	0.0109	0.0017	41.1107
rs7705012	0.0113	0.002	31.9225
rs7713317	0.0166	0.0018	85.0494
rs7714712	0.0112	0.0018	38.716
rs7715256	0.0158	0.0016	97.5156
rs7730004	0.0139	0.0018	59.6327
rs7734385	0.0101	0.0016	39.8477
rs7748777	0.0107	0.0016	44.7227
rs7751781	0.0095	0.0017	31.2284
rs7760082	0.0116	0.0018	41.5309
rs7770443	0.0159	0.0024	43.8906
rs779206	0.0122	0.0019	41.2299
rs779850	0.0127	0.0022	33.3244
rs7802342	0.0124	0.0019	42.5928
rs7805441	0.0116	0.0017	46.5606
rs7828076	0.0136	0.002	46.24
rs7828890	0.0152	0.0028	29.4694
rs784944	0.0129	0.0019	46.097
rs7871866	0.0179	0.0024	55.6267
rs7893571	0.0125	0.0018	48.2253
rs7899106	0.0327	0.0037	78.1074
rs7903146	0.0178	0.0018	97.7901
rs7929418	0.0115	0.0017	45.7612
rs793520	0.0102	0.0018	32.1111
rs7938117	0.0107	0.0017	39.6159
rs7944782	0.0144	0.0017	71.7509
rs7968390	0.0116	0.0018	41.5309
rs7975187	0.0137	0.0021	42.5601
rs7975791	0.0249	0.0043	33.5322
rs7982447	0.0143	0.0021	46.3696
rs7987314	0.0148	0.0026	32.4024
rs8006285	0.0111	0.0019	34.1302
rs8011994	0.0102	0.0017	36
rs8015818	0.0182	0.0029	39.3864
rs8024806	0.0254	0.0035	52.6661
rs8049894	0.0136	0.0022	38.2149
rs805412	0.0098	0.0017	33.2318
rs8061382	0.0324	0.0048	45.5625
rs8071182	0.0125	0.0022	32.2831
rs8075273	0.0137	0.0018	57.929
rs8081039	0.023	0.0037	38.6413
rs8089514	0.0124	0.0018	47.4568
rs8092503	0.0162	0.0019	72.6981
rs8097672	0.0209	0.0024	75.8351
rs811054	0.0135	0.0016	71.1914
rs8122855	0.0137	0.0018	57.929
rs8123881	0.0177	0.0024	54.3906
rs8126575	0.0152	0.0025	36.9664
rs816367	0.0107	0.0017	39.6159
rs8176786	0.0217	0.0039	30.9592
rs8181823	0.0125	0.002	39.0625
rs820098	0.0112	0.0018	38.716
rs823075	0.0096	0.0017	31.8893
rs836525	0.0138	0.0023	36
rs845084	0.0136	0.0019	51.2355
rs849135	0.0106	0.0016	43.8906
rs879620	0.0226	0.0017	176.734
rs880554	0.011	0.002	30.25
rs881301	0.0106	0.0017	38.8789
rs889398	0.0195	0.0016	148.535
rs891387	0.0208	0.0017	149.702
rs893006	0.0145	0.0018	64.892
rs895330	0.0196	0.0022	79.3719
rs896183	0.0101	0.0017	35.2976
rs898253	0.0152	0.0028	29.4694
rs900144	0.0148	0.0017	75.7924
rs902695	0.0097	0.0017	32.5571
rs905938	0.0143	0.0019	56.6454
rs9077	0.0136	0.0019	51.2355
rs925018	0.013	0.0017	58.4775
rs9267677	0.0204	0.0028	53.0816
rs9291467	0.0142	0.0017	69.7716
rs9294260	0.014	0.0016	76.5625
rs9295448	0.0108	0.0019	32.3102
rs9297524	0.0113	0.0018	39.4105
rs9299	0.0119	0.0018	43.7068
rs930295	0.0208	0.0023	81.7845
rs9304502	0.0116	0.0021	30.5125
rs9320823	0.0165	0.0017	94.2042
rs9327000	0.0112	0.0018	38.716
rs9332817	0.0384	0.0059	42.3602
rs934515	0.0181	0.0026	48.463
rs9352	0.0095	0.0017	31.2284
rs9356132	0.0099	0.0018	30.25
rs936227	0.0103	0.0017	36.7093
rs9362662	0.0103	0.0017	36.7093
rs9364687	0.0097	0.0016	36.7539
rs9370410	0.0105	0.0019	30.5402
rs9379694	0.0136	0.0024	32.1111
rs9388766	0.0103	0.0018	32.7438
rs9395747	0.0149	0.0019	61.4986
rs9408879	0.01	0.0018	30.8642
rs9426003	0.0103	0.0019	29.3878
rs944340	0.0112	0.0017	43.4048
rs9450537	0.0102	0.0018	32.1111
rs9466956	0.0108	0.0018	36
rs946824	0.0197	0.0025	62.0944
rs947088	0.0126	0.0019	43.9778
rs9478671	0.0117	0.0021	31.0408
rs9507881	0.013	0.002	42.25
rs9514131	0.0155	0.0026	35.5399
rs9527958	0.0102	0.0018	32.1111
rs9531786	0.0111	0.0018	38.0278
rs954018	0.0127	0.0018	49.7809
rs9540493	0.0129	0.0017	57.5813
rs9544930	0.0136	0.0024	32.1111
rs9559022	0.0121	0.0022	30.25
rs9569808	0.0195	0.002	95.0625
rs9571687	0.0122	0.0018	45.9383
rs9591874	0.018	0.0027	44.4444
rs9595908	0.0154	0.0017	82.0623
rs9603697	0.0134	0.0018	55.4198
rs961917	0.0107	0.0019	31.7147
rs9637498	0.0099	0.0017	33.9135
rs9638713	0.0298	0.0052	32.8417
rs9644681	0.011	0.0018	37.3457
rs9688431	0.0212	0.0034	38.8789
rs970433	0.0138	0.0018	58.7778
rs9714342	0.014	0.0019	54.2936
rs972283	0.0089	0.0016	30.9414
rs972540	0.0131	0.0018	52.966
rs9747668	0.0104	0.0018	33.3827
rs9785285	0.0127	0.0021	36.5737
rs9787306	0.0155	0.002	60.0625
rs9810356	0.0139	0.0022	39.9194
rs9816226	0.0315	0.0021	225
rs9818122	0.0228	0.002	129.96
rs9826775	0.0155	0.0024	41.7101
rs9827823	0.0182	0.0023	62.6163
rs987071	0.0126	0.002	39.69
rs9893197	0.0106	0.0018	34.679
rs9901595	0.0103	0.0018	32.7438
rs9910424	0.0092	0.0016	33.0625
rs9921416	0.0096	0.0017	31.8893
rs9935222	0.0096	0.0017	31.8893
rs9935366	0.0144	0.0018	64
rs9937053	0.0721	0.0016	2030.63
rs995258	0.0141	0.0017	68.7924
rs9964756	0.0158	0.0027	34.2442
rs9985365	0.0142	0.0018	62.2346
rs9989141	0.0168	0.0017	97.6609

## Sheet: Table S4d
Supplementary Table S4d. Estimates and F-statistics for instrumental variables used in Mendelian randomisation assessment of WHR with GDF15 as the outome (reverse MR)
SNP	Estimate	SE	F-statistic
rs10004900	0.0172	0.003	32.8711
rs10019888	0.0208	0.0023	81.7845
rs10049088	0.0271	0.0018	226.67
rs1011024	0.0153	0.0023	44.2514
rs10132280	0.0116	0.0018	41.5309
rs10133795	0.0104	0.0018	33.3827
rs10153926	0.0143	0.0024	35.5017
rs10158345	0.0117	0.0019	37.9197
rs10164099	0.0149	0.0025	35.5216
rs1017698	0.0113	0.0018	39.4105
rs10185087	0.0103	0.0018	32.7438
rs10195252	0.0228	0.0017	179.875
rs1020731	0.0127	0.0019	44.6787
rs1026462	0.0126	0.0018	49
rs10269616	0.011	0.002	30.25
rs10269783	0.0096	0.0017	31.8893
rs1036794	0.0114	0.002	32.49
rs10475249	0.0134	0.002	44.89
rs10477191	0.0279	0.004	48.6506
rs10490869	0.0183	0.0022	69.1921
rs10495563	0.0117	0.0018	42.25
rs10499013	0.0125	0.002	39.0625
rs1049969	0.0255	0.0028	82.9401
rs10505628	0.0104	0.0018	33.3827
rs10506110	0.0138	0.0019	52.7535
rs10507223	0.0134	0.0022	37.0992
rs10507524	0.0171	0.003	32.49
rs10512605	0.0231	0.0033	49
rs10745659	0.0127	0.0018	49.7809
rs10788569	0.0134	0.0019	49.7396
rs10791249	0.0104	0.0018	33.3827
rs10795055	0.0106	0.0018	34.679
rs10797116	0.0101	0.0018	31.4846
rs10806842	0.011	0.002	30.25
rs10819189	0.0114	0.002	32.49
rs10827252	0.0113	0.0018	39.4105
rs10876528	0.0236	0.0018	171.901
rs10880321	0.0114	0.0019	36
rs10883518	0.011	0.0019	33.518
rs10896012	0.018	0.0022	66.9421
rs10919388	0.0266	0.0019	196
rs10923724	0.024	0.0017	199.308
rs10963067	0.0178	0.0032	30.9414
rs10968576	0.0144	0.0018	64
rs10980797	0.0154	0.002	59.29
rs10991433	0.0254	0.0028	82.2908
rs11030107	0.0178	0.0019	87.7673
rs11038354	0.0105	0.0018	34.0278
rs11048456	0.0266	0.0019	196
rs11051005	0.013	0.0019	46.8144
rs11055887	0.0133	0.0023	33.4386
rs11059476	0.0244	0.0043	32.199
rs11071759	0.0104	0.0018	33.3827
rs11133377	0.0143	0.002	51.1225
rs11154521	0.0102	0.0018	32.1111
rs11159088	0.0103	0.0018	32.7438
rs11162968	0.0109	0.0019	32.9114
rs11167753	0.0114	0.002	32.49
rs11176015	0.0151	0.002	57.0025
rs11187537	0.013	0.002	42.25
rs111877173	0.0164	0.0029	31.981
rs11208660	0.023	0.003	58.7778
rs11214589	0.0114	0.0018	40.1111
rs11216183	0.0226	0.0034	44.1834
rs1122080	0.0131	0.0022	35.4566
rs112266013	0.0167	0.0028	35.5727
rs11235	0.0133	0.0017	61.2076
rs1124639	0.0113	0.0017	44.1834
rs113006464	0.0569	0.0084	45.8845
rs113315602	0.0273	0.0036	57.5069
rs1142	0.0149	0.0018	68.5216
rs114394994	0.0274	0.0039	49.3596
rs114760566	0.0674	0.0048	197.168
rs11577194	0.0094	0.0017	30.5744
rs1158805	0.0133	0.0018	54.5957
rs11607341	0.0239	0.004	35.7006
rs11608693	0.0168	0.0027	38.716
rs116353863	0.066	0.0086	58.8967
rs1163627	0.0104	0.0017	37.4256
rs11654387	0.0161	0.0018	80.0031
rs11654395	0.0181	0.0033	30.0836
rs11664106	0.02	0.0021	90.7029
rs11677670	0.0175	0.0023	57.8922
rs11688816	0.0093	0.0017	29.9273
rs11705729	0.0106	0.0019	31.1247
rs11718898	0.0137	0.0019	51.9917
rs11724804	0.0165	0.0018	84.0278
rs11726981	0.0114	0.002	32.49
rs11747001	0.0154	0.002	59.29
rs117471638	0.0419	0.0071	34.8266
rs11752928	0.0105	0.0019	30.5402
rs11764879	0.0117	0.0019	37.9197
rs11782074	0.0109	0.0019	32.9114
rs11792069	0.0136	0.0024	32.1111
rs11854996	0.0114	0.002	32.49
rs11897119	0.0134	0.0017	62.1315
rs1190982	0.0157	0.0019	68.2798
rs11956399	0.0158	0.0022	51.5785
rs11992444	0.0185	0.002	85.5625
rs12024554	0.0149	0.0023	41.9679
rs12042959	0.0155	0.0025	38.44
rs12048743	0.013	0.0018	52.1605
rs12101393	0.014	0.0022	40.4959
rs12286929	0.0094	0.0017	30.5744
rs12287076	0.0192	0.002	92.16
rs12430764	0.0107	0.0018	35.3364
rs1243188	0.0148	0.0019	60.6759
rs12440605	0.0118	0.0018	42.9753
rs12440695	0.0103	0.0018	32.7438
rs12450225	0.0105	0.0017	38.1488
rs12459350	0.0134	0.0017	62.1315
rs12461964	0.0125	0.002	39.0625
rs12466434	0.0103	0.0018	32.7438
rs12469667	0.013	0.0021	38.322
rs12495178	0.0124	0.0018	47.4568
rs1250552	0.0094	0.0017	30.5744
rs12527712	0.0284	0.0033	74.0643
rs12575252	0.0154	0.0018	73.1975
rs12593088	0.0128	0.0019	45.385
rs12595496	0.0178	0.0025	50.6944
rs12595970	0.0147	0.0025	34.5744
rs12602912	0.0176	0.0021	70.2404
rs12608504	0.0251	0.0018	194.448
rs12621633	0.0538	0.0091	34.9528
rs12631066	0.0124	0.0021	34.8662
rs12643960	0.0165	0.0027	37.3457
rs12669521	0.0127	0.0021	36.5737
rs12684047	0.0185	0.0023	64.6975
rs12705971	0.0092	0.0017	29.2872
rs12777288	0.0139	0.0021	43.8118
rs12823266	0.0114	0.0021	29.4694
rs12828016	0.0114	0.0018	40.1111
rs12828318	0.013	0.0023	31.9471
rs1286769	0.0095	0.0017	31.2284
rs1289021	0.0114	0.0018	40.1111
rs12908637	0.0156	0.0027	33.3827
rs1294410	0.0247	0.0017	211.104
rs12985803	0.0109	0.002	29.7025
rs13022972	0.0125	0.0022	32.2831
rs13028903	0.0113	0.0018	39.4105
rs13063979	0.0135	0.0019	50.4848
rs13080520	0.0107	0.0018	35.3364
rs13095863	0.0107	0.0019	31.7147
rs13130484	0.0147	0.0017	74.7716
rs13179413	0.0159	0.002	63.2025
rs13191362	0.0148	0.0026	32.4024
rs13198178	0.0214	0.0037	33.4522
rs13198809	0.0175	0.0031	31.8678
rs13229637	0.0159	0.0025	40.4496
rs13232789	0.011	0.0019	33.518
rs13255070	0.0136	0.0022	38.2149
rs13256367	0.0141	0.0019	55.072
rs1328757	0.0114	0.0018	40.1111
rs13316065	0.017	0.0018	89.1975
rs13329447	0.0101	0.0018	31.4846
rs1334576	0.0162	0.0018	81
rs13391573	0.0214	0.0023	86.5709
rs1339376	0.0149	0.002	55.5025
rs1345203	0.0187	0.0024	60.7101
rs1360485	0.0152	0.0018	71.3086
rs13642	0.0113	0.0019	35.3712
rs1379828	0.0131	0.0021	38.9138
rs1382284	0.0099	0.0018	30.25
rs1382894	0.0114	0.0019	36
rs140201358	0.0557	0.0086	41.9482
rs1411431	0.0152	0.0027	31.6927
rs1420197	0.0098	0.0018	29.642
rs142927801	0.0414	0.0073	32.1629
rs1431659	0.0143	0.002	51.1225
rs143384	0.0155	0.0017	83.1315
rs1437	0.0128	0.0018	50.5679
rs1440372	0.0137	0.0019	51.9917
rs1441264	0.0111	0.0018	38.0278
rs1443512	0.0282	0.002	198.81
rs1452075	0.0123	0.0019	41.9086
rs145244672	0.0245	0.0034	51.9247
rs145952040	0.033	0.0052	40.2737
rs1464454	0.0097	0.0018	29.0401
rs1485741	0.0175	0.0027	42.0096
rs1494204	0.0106	0.0018	34.679
rs15285	0.0117	0.0019	37.9197
rs1534696	0.0226	0.0017	176.734
rs1551795	0.0094	0.0017	30.5744
rs155524	0.0134	0.0018	55.4198
rs1558902	0.0398	0.0017	548.111
rs1563355	0.0277	0.0019	212.546
rs1568427	0.0188	0.0021	80.1451
rs1569135	0.0215	0.0017	159.948
rs1609725	0.0205	0.0034	36.3538
rs1609906	0.0126	0.002	39.69
rs1657930	0.0134	0.0022	37.0992
rs1672936	0.0116	0.002	33.64
rs1680490	0.0118	0.002	34.81
rs16853606	0.0132	0.0023	32.9376
rs16896261	0.0142	0.0025	32.2624
rs17015701	0.0122	0.0021	33.7506
rs17024393	0.0295	0.0051	33.4583
rs17078048	0.0136	0.0025	29.5936
rs1708302	0.0114	0.0018	40.1111
rs17109256	0.0169	0.0021	64.7642
rs17152077	0.0137	0.0025	30.0304
rs17158366	0.016	0.0028	32.6531
rs17185933	0.0144	0.0022	42.843
rs1718618	0.024	0.0038	39.8892
rs1722123	0.0113	0.002	31.9225
rs17289049	0.0164	0.003	29.8844
rs17324331	0.012	0.0019	39.8892
rs17326656	0.0153	0.0021	53.0816
rs17425622	0.0199	0.0025	63.3616
rs17446091	0.0115	0.0021	29.9887
rs17448885	0.011	0.0019	33.518
rs17489259	0.012	0.0021	32.6531
rs1752169	0.0123	0.002	37.8225
rs17568628	0.0264	0.0044	36
rs1757471	0.0128	0.0018	50.5679
rs17644283	0.0148	0.0018	67.6049
rs17724992	0.0143	0.0019	56.6454
rs17738166	0.0114	0.0018	40.1111
rs17764730	0.0114	0.0021	29.4694
rs1787013	0.0108	0.0018	36
rs1789882	0.016	0.0023	48.3932
rs1800437	0.0209	0.0022	90.25
rs1800837	0.0148	0.0024	38.0278
rs1800978	0.0201	0.0026	59.7648
rs1805741	0.0135	0.002	45.5625
rs183801733	0.0243	0.0034	51.0804
rs186230002	0.043	0.0076	32.0118
rs1863652	0.0103	0.0019	29.3878
rs188575117	0.0209	0.0027	59.9191
rs1891216	0.0104	0.0018	33.3827
rs1992145	0.0111	0.0018	38.0278
rs1997833	0.0122	0.0019	41.2299
rs2008514	0.017	0.0017	100
rs2012485	0.0247	0.0044	31.5129
rs2033529	0.0153	0.0019	64.8449
rs2047937	0.0106	0.0017	38.8789
rs2057869	0.0111	0.002	30.8025
rs2061007	0.0105	0.0018	34.0278
rs2061708	0.0152	0.002	57.76
rs2069443	0.0119	0.0021	32.1111
rs2071167	0.0111	0.002	30.8025
rs2104574	0.0102	0.0019	28.8199
rs2112347	0.015	0.0017	77.8547
rs213020	0.0123	0.0021	34.3061
rs213637	0.0125	0.0018	48.2253
rs2139799	0.0117	0.0019	37.9197
rs2148252	0.0121	0.0019	40.5568
rs2161097	0.0126	0.0018	49
rs2161228	0.0192	0.0029	43.8335
rs2163188	0.015	0.0018	69.4444
rs2165864	0.0102	0.0018	32.1111
rs2167750	0.0199	0.0018	122.225
rs2194691	0.0136	0.0024	32.1111
rs2195086	0.0144	0.0024	36
rs220381	0.0106	0.0019	31.1247
rs2205189	0.0113	0.002	31.9225
rs2229616	0.0616	0.0062	98.7138
rs2236519	0.0212	0.0018	138.716
rs2242416	0.0144	0.0017	71.7509
rs2254069	0.0209	0.0027	59.9191
rs2276106	0.015	0.002	56.25
rs2276390	0.021	0.0019	122.161
rs2277339	0.0168	0.0029	33.56
rs2289863	0.0114	0.002	32.49
rs2294239	0.02	0.0017	138.408
rs2298632	0.0144	0.0017	71.7509
rs2301453	0.0224	0.0017	173.619
rs2306589	0.016	0.0017	88.5813
rs2333496	0.0104	0.0018	33.3827
rs2335077	0.0121	0.0019	40.5568
rs2357760	0.0113	0.0018	39.4105
rs2371767	0.0291	0.0019	234.573
rs2373078	0.0158	0.0029	29.6837
rs2384463	0.0107	0.0018	35.3364
rs2391168	0.026	0.0021	153.288
rs2398893	0.0157	0.0019	68.2798
rs2412107	0.0133	0.0021	40.1111
rs2419407	0.0105	0.0018	34.0278
rs2428548	0.0154	0.0019	65.6953
rs244723	0.0148	0.002	54.76
rs2448	0.0158	0.002	62.41
rs2455848	0.0128	0.0018	50.5679
rs2456530	0.0163	0.0026	39.3033
rs2475837	0.0151	0.0026	33.7293
rs2481665	0.0112	0.0017	43.4048
rs2492419	0.0102	0.0018	32.1111
rs2504706	0.0132	0.0021	39.5102
rs2509963	0.0143	0.002	51.1225
rs2512885	0.0097	0.0017	32.5571
rs2513987	0.0138	0.0022	39.3471
rs2523582	0.0239	0.0022	118.019
rs2526886	0.0125	0.0021	35.4308
rs2531992	0.013	0.0023	31.9471
rs2590440	0.0137	0.0022	38.7789
rs2595004	0.0156	0.0023	46.0038
rs2709373	0.0126	0.0023	30.0113
rs2715135	0.0109	0.0018	36.6698
rs2725371	0.0172	0.0021	67.0839
rs2742690	0.0168	0.0025	45.1584
rs2808104	0.0124	0.0021	34.8662
rs2815749	0.0166	0.0021	62.4853
rs2823096	0.0128	0.0023	30.9716
rs2836179	0.0132	0.0018	53.7778
rs2838006	0.0109	0.0019	32.9114
rs2839108	0.0113	0.002	31.9225
rs28434748	0.0152	0.0024	40.1111
rs28451064	0.0177	0.003	34.81
rs28580375	0.0135	0.0024	31.6406
rs28647893	0.0116	0.002	33.64
rs28680958	0.0135	0.0023	34.4518
rs2925979	0.0215	0.0018	142.67
rs2964006	0.013	0.002	42.25
rs2981423	0.0194	0.0035	30.7233
rs3092781	0.0145	0.0017	72.7509
rs310761	0.0202	0.0033	37.4692
rs317646	0.011	0.002	30.25
rs332105	0.0139	0.0018	59.6327
rs34000	0.0107	0.0018	35.3364
rs34322	0.0104	0.0018	33.3827
rs34699	0.0118	0.0018	42.9753
rs35014268	0.0122	0.0022	30.7521
rs35169799	0.0373	0.0041	82.7656
rs35175534	0.0257	0.0031	68.7294
rs35311453	0.0121	0.0021	33.1995
rs362275	0.0128	0.0019	45.385
rs367026	0.0139	0.002	48.3025
rs3736485	0.0118	0.0017	48.1799
rs3740237	0.0153	0.0026	34.6287
rs3747579	0.015	0.0018	69.4444
rs3764002	0.0211	0.002	111.302
rs3767848	0.0124	0.0021	34.8662
rs3770655	0.011	0.002	30.25
rs377436	0.0109	0.0019	32.9114
rs3786897	0.0237	0.0017	194.356
rs3788529	0.0121	0.0021	33.1995
rs3789615	0.0133	0.0017	61.2076
rs3804381	0.0124	0.002	38.44
rs380654	0.0122	0.0018	45.9383
rs3810291	0.0121	0.0018	45.1883
rs3814614	0.0108	0.0018	36
rs3825061	0.0142	0.0018	62.2346
rs3887424	0.024	0.0043	31.152
rs3891424	0.0278	0.0044	39.9194
rs3930017	0.01	0.0018	30.8642
rs39312	0.0154	0.0018	73.1975
rs399984	0.0129	0.0022	34.3822
rs400223	0.01	0.0018	30.8642
rs4055791	0.0118	0.002	34.81
rs411136	0.0117	0.0017	47.3668
rs4141261	0.0109	0.0019	32.9114
rs4145698	0.0108	0.0019	32.3102
rs414865	0.0109	0.0019	32.9114
rs4239275	0.0118	0.0018	42.9753
rs4243130	0.0121	0.0021	33.1995
rs4284389	0.0121	0.002	36.6025
rs429358	0.0346	0.0027	164.219
rs4366921	0.0121	0.0021	33.1995
rs4382592	0.012	0.0019	39.8892
rs439223	0.0243	0.0034	51.0804
rs4395620	0.0106	0.0018	34.679
rs4450871	0.0108	0.0019	32.3102
rs4454042	0.0127	0.002	40.3225
rs4459369	0.0115	0.0021	29.9887
rs4476935	0.0108	0.0018	36
rs4511993	0.0104	0.0018	33.3827
rs4534007	0.0093	0.0017	29.9273
rs459193	0.0239	0.0019	158.23
rs4635727	0.0118	0.002	34.81
rs4660808	0.0145	0.0021	47.6757
rs4668304	0.0105	0.0019	30.5402
rs4673616	0.0121	0.002	36.6025
rs4686340	0.0123	0.002	37.8225
rs4718966	0.0102	0.0018	32.1111
rs4727695	0.0215	0.0029	54.9643
rs4738141	0.02	0.0019	110.803
rs4752083	0.0114	0.002	32.49
rs4755720	0.0132	0.0018	53.7778
rs4765219	0.0267	0.0018	220.028
rs4779526	0.0132	0.0021	39.5102
rs4782289	0.0146	0.0025	34.1056
rs4788204	0.0169	0.0018	88.1512
rs4808845	0.0122	0.002	37.21
rs4812700	0.0183	0.0029	39.8205
rs4820408	0.0109	0.0017	41.1107
rs4837261	0.0129	0.0023	31.4575
rs4849294	0.0124	0.0018	47.4568
rs4851057	0.0158	0.0027	34.2442
rs4851283	0.0164	0.0021	60.9887
rs4867673	0.0107	0.0018	35.3364
rs4868256	0.0108	0.0019	32.3102
rs4894803	0.0149	0.0018	68.5216
rs4897158	0.0135	0.0023	34.4518
rs4902632	0.0155	0.0024	41.7101
rs4964188	0.0112	0.002	31.36
rs4979284	0.0125	0.0022	32.2831
rs510197	0.0145	0.0022	43.4401
rs536665	0.0171	0.0024	50.7656
rs543874	0.0203	0.0021	93.4444
rs544668	0.0105	0.0018	34.0278
rs55683935	0.0383	0.0052	54.2489
rs55747707	0.0154	0.0023	44.8318
rs55920843	0.0623	0.0092	45.8565
rs55957788	0.013	0.0021	38.322
rs56133301	0.0573	0.0085	45.4435
rs56185013	0.013	0.0024	29.3403
rs564930	0.0202	0.003	45.3378
rs57432828	0.0236	0.0043	30.1222
rs5762919	0.0275	0.0043	40.9005
rs579682	0.0133	0.002	44.2225
rs587271	0.0106	0.0019	31.1247
rs591939	0.0177	0.0023	59.2231
rs601339	0.0177	0.0023	59.2231
rs6021889	0.0203	0.0019	114.152
rs605066	0.0192	0.0018	113.778
rs61783470	0.019	0.003	40.1111
rs61876729	0.0214	0.0034	39.6159
rs61986159	0.0136	0.0023	34.9641
rs62074125	0.02	0.0022	82.6446
rs62095889	0.0166	0.0021	62.4853
rs62106258	0.0434	0.0046	89.0151
rs62424543	0.0215	0.0038	32.0118
rs62505960	0.0196	0.0035	31.36
rs62506196	0.0159	0.0027	34.679
rs62565259	0.0157	0.0027	33.8121
rs6430168	0.0123	0.0022	31.2583
rs6433219	0.0136	0.002	46.24
rs6442644	0.0112	0.0019	34.7479
rs645040	0.0156	0.002	60.84
rs647248	0.0105	0.0018	34.0278
rs6474945	0.0101	0.0017	35.2976
rs6480914	0.0114	0.002	32.49
rs6487542	0.0133	0.0022	36.5475
rs6545714	0.0139	0.0017	66.8547
rs6548834	0.0118	0.0018	42.9753
rs6567160	0.0263	0.002	172.923
rs6590683	0.0113	0.0018	39.4105
rs664532	0.0113	0.0019	35.3712
rs6658424	0.0125	0.0019	43.2825
rs6658723	0.0145	0.002	52.5625
rs6688233	0.0186	0.0021	78.449
rs668871	0.0134	0.002	44.89
rs6699397	0.0118	0.0017	48.1799
rs672341	0.0122	0.002	37.21
rs672356	0.0132	0.0021	39.5102
rs6743060	0.0266	0.0022	146.19
rs6749646	0.021	0.0022	91.1157
rs6794936	0.0099	0.0017	33.9135
rs6795831	0.0288	0.0023	156.794
rs6800707	0.0187	0.0023	66.104
rs68190114	0.0219	0.0039	31.5325
rs6861681	0.018	0.0018	100
rs6870983	0.0155	0.002	60.0625
rs6874848	0.0138	0.002	47.61
rs6907898	0.0135	0.0017	63.0623
rs6924555	0.0138	0.0024	33.0625
rs6940715	0.0162	0.0029	31.2057
rs6941962	0.0237	0.0026	83.0902
rs6942652	0.0126	0.0018	49
rs6955431	0.0114	0.0019	36
rs704000	0.0109	0.002	29.7025
rs704061	0.0118	0.0018	42.9753
rs7070670	0.0132	0.0021	39.5102
rs7070749	0.0126	0.002	39.69
rs7078709	0.0143	0.0026	30.25
rs708437	0.0144	0.0024	36
rs7117951	0.0125	0.002	39.0625
rs711869	0.0171	0.0018	90.25
rs713770	0.0119	0.0018	43.7068
rs71385734	0.0192	0.0026	54.5325
rs7138803	0.0125	0.0018	48.2253
rs7143963	0.0136	0.0022	38.2149
rs71511786	0.0207	0.0036	33.0625
rs7183908	0.0158	0.002	62.41
rs7186893	0.0137	0.002	46.9225
rs7206608	0.0127	0.0019	44.6787
rs7209595	0.0136	0.0018	57.0864
rs7213608	0.0171	0.0019	81
rs7217226	0.0137	0.0018	57.929
rs7222	0.0109	0.0018	36.6698
rs7222766	0.0093	0.0017	29.9273
rs7235891	0.0116	0.0018	41.5309
rs7239114	0.0095	0.0017	31.2284
rs7257330	0.0132	0.0018	53.7778
rs72628504	0.0325	0.0041	62.8346
rs72647336	0.0247	0.0044	31.5129
rs7267979	0.0101	0.0017	35.2976
rs72823412	0.0193	0.0035	30.4073
rs72889643	0.0229	0.004	32.7756
rs72895340	0.0276	0.0045	37.6178
rs729062	0.0204	0.0036	32.1111
rs72932183	0.0206	0.0027	58.2112
rs72959041	0.126	0.0044	820.041
rs7311622	0.0119	0.0018	43.7068
rs7350648	0.0138	0.0025	30.4704
rs7395513	0.0173	0.002	74.8225
rs74388175	0.0134	0.0025	28.7296
rs74593044	0.023	0.0036	40.8179
rs74628422	0.0141	0.0024	34.5156
rs747249	0.0111	0.0019	34.1302
rs747601	0.0128	0.002	40.96
rs7492628	0.0125	0.0019	43.2825
rs7521902	0.0112	0.002	31.36
rs7525092	0.0116	0.002	33.64
rs7528123	0.0103	0.0018	32.7438
rs7531656	0.0163	0.0018	82.0031
rs753804	0.0172	0.0023	55.9244
rs754984	0.0198	0.0035	32.0033
rs7561798	0.0097	0.0017	32.5571
rs7591387	0.0179	0.0028	40.8686
rs7598832	0.0189	0.0018	110.25
rs7599312	0.0114	0.0019	36
rs7647305	0.0142	0.0021	45.7234
rs7680787	0.0097	0.0018	29.0401
rs7744833	0.0125	0.0019	43.2825
rs77497827	0.0126	0.0022	32.8017
rs77617442	0.0122	0.0022	30.7521
rs7801581	0.0167	0.002	69.7225
rs780159	0.0133	0.0017	61.2076
rs7823561	0.0159	0.0019	70.0305
rs7848336	0.0132	0.002	43.56
rs7848552	0.0128	0.0023	30.9716
rs785505	0.024	0.0042	32.6531
rs78629618	0.0188	0.0033	32.4555
rs789351	0.0123	0.0017	52.3495
rs7898903	0.0148	0.0027	30.0466
rs7907173	0.0109	0.0018	36.6698
rs79167390	0.0192	0.0034	31.8893
rs7919055	0.0282	0.0045	39.2711
rs7932891	0.0113	0.002	31.9225
rs793456	0.0106	0.0018	34.679
rs797486	0.0316	0.0026	147.716
rs8024294	0.0177	0.0028	39.9605
rs8039418	0.0113	0.0018	39.4105
rs8043060	0.0166	0.002	68.89
rs8054299	0.0107	0.0019	31.7147
rs8054765	0.0121	0.0021	33.1995
rs805770	0.0178	0.0018	97.7901
rs8060576	0.0161	0.0027	35.5569
rs8070737	0.016	0.0023	48.3932
rs8071778	0.016	0.0025	40.96
rs8074344	0.0116	0.002	33.64
rs8075273	0.0138	0.0019	52.7535
rs8096564	0.0114	0.002	32.49
rs809955	0.0155	0.002	60.0625
rs8103017	0.0165	0.0022	56.25
rs8141715	0.0136	0.002	46.24
rs843460	0.0119	0.0021	32.1111
rs852425	0.0102	0.0018	32.1111
rs858519	0.0121	0.002	36.6025
rs863750	0.0259	0.0017	232.114
rs881301	0.0134	0.0018	55.4198
rs888675	0.0106	0.0019	31.1247
rs889398	0.0171	0.0017	101.18
rs901630	0.0119	0.0017	49
rs905938	0.0126	0.0019	43.9778
rs910382	0.0169	0.0018	88.1512
rs929069	0.0128	0.0023	30.9716
rs929641	0.0127	0.0017	55.8097
rs9296938	0.0145	0.002	52.5625
rs930653	0.0108	0.0019	32.3102
rs9362083	0.0117	0.0018	42.25
rs9369425	0.0195	0.0019	105.332
rs9370243	0.0198	0.0032	38.2852
rs9375478	0.0206	0.0018	130.975
rs9400239	0.0134	0.0018	55.4198
rs9515201	0.0121	0.0018	45.1883
rs9556979	0.0113	0.0019	35.3712
rs9630986	0.0122	0.0019	41.2299
rs9643248	0.0119	0.0021	32.1111
rs9644033	0.0188	0.0021	80.1451
rs9659380	0.0179	0.0024	55.6267
rs968821	0.0111	0.0019	34.1302
rs978332	0.0113	0.0019	35.3712
rs979012	0.0116	0.0018	41.5309
rs9792666	0.0397	0.0046	74.4844
rs9844972	0.0278	0.0036	59.6327
rs9859117	0.0122	0.0022	30.7521
rs9872031	0.0202	0.0018	125.938
rs987237	0.02	0.0022	82.6446
rs9905140	0.0114	0.0017	44.9689
rs9919066	0.0179	0.0033	29.4224
rs9942009	0.0126	0.0018	49
rs9951872	0.0206	0.0024	73.6736
rs9969455	0.0111	0.0018	38.0278
rs998584	0.0351	0.0017	426.301
rs998732	0.0165	0.0023	51.465
rs998749	0.013	0.0017	58.4775
rs9988	0.0152	0.0024	40.1111

## Sheet: Table S4e
Supplementary Table S4e. Estimates and F-statistics for instrumental variables used in Mendelian randomisation assessment of diabetes with GDF15 as the outome (reverse MR)
SNP	Estimate	SE	F-statistic
rs1005752	0.079	0.007	127.367
rs10096633	0.07	0.0098	51.0204
rs10097617	0.051	0.0063	65.5329
rs10193538	0.037	0.0065	32.4024
rs10195252	0.06	0.0064	87.8906
rs10228066	0.066	0.0063	109.751
rs10406327	0.035	0.0064	29.9072
rs10406431	0.059	0.0065	82.3905
rs10471048	0.042	0.0067	39.2961
rs1061810	0.05	0.007	51.0204
rs10750397	0.045	0.007	41.3265
rs1076902	0.058	0.011	27.8017
rs10811647	0.045	0.0064	49.4385
rs10811660	0.16	0.0086	346.133
rs10830963	0.099	0.0071	194.426
rs10842994	0.074	0.0081	83.4629
rs10882101	0.11	0.0064	295.41
rs10893829	0.057	0.0091	39.2344
rs10908278	0.074	0.0064	133.691
rs10937721	0.087	0.0065	179.148
rs10938398	0.044	0.0064	47.2656
rs10954772	0.041	0.0068	36.3538
rs10974438	0.051	0.0066	59.7107
rs11023461	0.076	0.013	34.1775
rs11062977	0.068	0.012	32.1111
rs11063018	0.053	0.0084	39.8101
rs11070332	0.049	0.0066	55.1194
rs11137820	0.035	0.0064	29.9072
rs11257655	0.09	0.0076	140.235
rs1127215	0.047	0.0064	53.9307
rs11496066	0.047	0.0083	32.0656
rs115505614	0.17	0.015	128.444
rs11642430	0.042	0.0065	41.7515
rs116425039	0.28	0.036	60.4938
rs11680058	0.058	0.01	33.64
rs11688682	0.058	0.0075	59.8044
rs11699802	0.043	0.0064	45.1416
rs117001013	0.065	0.011	34.9174
rs11708067	0.089	0.0076	137.136
rs11709077	0.11	0.0098	125.989
rs117483894	0.093	0.017	29.9273
rs11759026	0.067	0.0075	79.8044
rs117616862	0.23	0.039	34.7798
rs118109589	0.12	0.018	44.4444
rs11820019	0.14	0.021	44.4444
rs11842871	0.042	0.0073	33.1019
rs11926707	0.038	0.0066	33.1497
rs11967262	0.041	0.0064	41.04
rs11991662	0.043	0.0077	31.1857
rs12001437	0.041	0.0065	39.787
rs12048743	0.038	0.0064	35.2539
rs12140153	0.064	0.011	33.8512
rs12454712	0.049	0.0067	53.4863
rs1260326	0.067	0.0065	106.249
rs12640250	0.039	0.0071	30.1726
rs12680028	0.035	0.0063	30.8642
rs12719778	0.039	0.0064	37.1338
rs12811407	0.049	0.007	49
rs12920022	0.053	0.009	34.679
rs1296328	0.035	0.0064	29.9072
rs13041756	0.058	0.01	33.64
rs13085136	0.074	0.013	32.4024
rs1316776	0.046	0.0066	48.5767
rs13179413	0.058	0.0071	66.7328
rs13216165	0.04	0.0064	39.0625
rs13262861	0.094	0.0087	116.739
rs13426680	0.082	0.013	39.787
rs1359790	0.083	0.0071	136.659
rs1377807	0.057	0.0068	70.2638
rs139984520	0.12	0.022	29.7521
rs1412234	0.043	0.0068	39.987
rs141241414	0.19	0.028	46.0459
rs141521721	0.12	0.021	32.6531
rs1421085	0.12	0.0064	351.562
rs1426371	0.05	0.0073	46.9131
rs145003494	0.29	0.034	72.7509
rs145678014	0.11	0.016	47.2656
rs145904381	0.17	0.031	30.0728
rs146262265	0.24	0.042	32.6531
rs146886108	0.38	0.047	65.3689
rs147572957	0.2	0.037	29.2184
rs148766658	0.11	0.017	41.8685
rs149364428	0.24	0.034	49.827
rs1493694	0.084	0.01	70.56
rs149413908	0.36	0.053	46.1374
rs149717632	0.064	0.011	33.8512
rs151137175	0.43	0.07	37.7347
rs1531583	0.11	0.015	53.7778
rs1561927	0.043	0.0071	36.6792
rs1562396	0.058	0.0069	70.6574
rs1573090	0.05	0.0064	61.0352
rs1580278	0.041	0.0064	41.04
rs1708302	0.092	0.0063	213.253
rs17122772	0.043	0.0077	31.1857
rs17168486	0.069	0.0083	69.1102
rs17250977	0.12	0.018	44.4444
rs17522122	0.038	0.0064	35.2539
rs17689007	0.048	0.0064	56.25
rs177045	0.05	0.0069	52.51
rs17772814	0.078	0.013	36
rs17791513	0.1	0.013	59.1716
rs17802463	0.039	0.0071	30.1726
rs1783541	0.061	0.008	58.1406
rs17836088	0.058	0.0077	56.7381
rs1791936	0.036	0.0066	29.7521
rs1796330	0.049	0.0064	58.6182
rs1800961	0.16	0.017	88.5813
rs1801645	0.048	0.0074	42.0745
rs182771291	0.48	0.071	45.7052
rs185025714	0.28	0.048	34.0278
rs189044925	0.28	0.043	42.4013
rs189966089	0.13	0.022	34.9174
rs1903002	0.036	0.0064	31.6406
rs2066827	0.044	0.0081	29.5077
rs2102278	0.038	0.0069	30.3298
rs2189301	0.06	0.0097	38.2612
rs2197973	0.035	0.0063	30.8642
rs2237895	0.093	0.0066	198.554
rs2249105	0.053	0.0066	64.4858
rs2258238	0.11	0.011	100
rs2268078	0.043	0.0067	41.1896
rs2272163	0.037	0.0065	32.4024
rs2280141	0.047	0.0063	55.6563
rs2301826	0.059	0.0079	55.7763
rs2307111	0.053	0.0065	66.4852
rs231360	0.06	0.0066	82.6446
rs231907	0.039	0.007	31.0408
rs243024	0.058	0.0063	84.7569
rs2456530	0.056	0.0096	34.0278
rs2642588	0.052	0.0069	56.7948
rs2767036	0.039	0.0069	31.9471
rs2796441	0.066	0.0065	103.101
rs2800733	0.051	0.007	53.0816
rs2820446	0.057	0.007	66.3061
rs28505901	0.076	0.0081	88.0354
rs2872246	0.036	0.0063	32.6531
rs28819812	0.04	0.0072	30.8642
rs291367	0.044	0.007	39.5102
rs2925979	0.053	0.0069	59.0002
rs2972144	0.094	0.0066	202.847
rs3095571	0.037	0.0064	33.4229
rs3110641	0.044	0.008	30.25
rs3111316	0.046	0.0065	50.0828
rs31229	0.038	0.0066	33.1497
rs3217792	0.12	0.012	100
rs3217862	0.046	0.0085	29.2872
rs329122	0.037	0.0064	33.4229
rs340874	0.068	0.0064	112.891
rs34298980	0.04	0.0066	36.7309
rs34454109	0.044	0.0076	33.518
rs34584161	0.048	0.0075	40.96
rs34715063	0.076	0.01	57.76
rs348330	0.051	0.0067	57.9416
rs34855406	0.05	0.0071	49.5933
rs34872471	0.31	0.0069	2018.48
rs34965774	0.054	0.0092	34.4518
rs35352848	0.071	0.0079	80.7723
rs35895680	0.055	0.0069	63.5371
rs35913461	0.056	0.0086	42.4013
rs35999103	0.052	0.0091	32.6531
rs36112520	0.082	0.011	55.5702
rs362307	0.074	0.012	38.0278
rs3751837	0.044	0.0077	32.6531
rs3768321	0.085	0.008	112.891
rs3772071	0.048	0.007	47.0204
rs3774723	0.065	0.0089	53.3392
rs3798519	0.058	0.0082	50.0297
rs3802177	0.11	0.0069	254.148
rs3810291	0.046	0.0068	45.7612
rs3811978	0.053	0.0085	38.8789
rs39328	0.036	0.0064	31.6406
rs41277236	0.096	0.017	31.8893
rs4148856	0.049	0.0077	40.4959
rs4279506	0.039	0.0066	34.9174
rs429358	0.08	0.0092	75.6144
rs4457053	0.059	0.0069	73.1149
rs465002	0.073	0.0073	100
rs4686471	0.06	0.0065	85.2071
rs4688760	0.043	0.0069	38.8364
rs4709746	0.056	0.0096	34.0278
rs474513	0.039	0.0063	38.322
rs4776970	0.039	0.0066	34.9174
rs4804833	0.047	0.0066	50.7117
rs4925109	0.048	0.0068	49.827
rs4929965	0.07	0.0067	109.156
rs4932265	0.065	0.0071	83.8127
rs4946812	0.039	0.0068	32.8936
rs4977213	0.051	0.0067	57.9416
rs505922	0.046	0.0067	47.1374
rs5213	0.071	0.0066	115.725
rs523288	0.056	0.0074	57.2681
rs539515	0.051	0.008	40.6406
rs55653563	0.043	0.0072	35.6674
rs56337234	0.057	0.0066	74.5868
rs56348580	0.062	0.0069	80.7393
rs57235767	0.046	0.007	43.1837
rs5758223	0.038	0.007	29.4694
rs576674	0.053	0.0086	37.98
rs58432198	0.065	0.01	42.25
rs58730668	0.068	0.0092	54.6314
rs601945	0.08	0.0085	88.5813
rs60276348	0.052	0.0095	29.9612
rs6063048	0.047	0.0071	43.8207
rs6070625	0.044	0.0063	48.778
rs61676547	0.055	0.0081	46.1058
rs62007683	0.037	0.0067	30.4968
rs62080313	0.056	0.0098	32.6531
rs62107261	0.11	0.016	47.2656
rs62271373	0.088	0.014	39.5102
rs62492368	0.044	0.0069	40.6637
rs6458354	0.051	0.007	53.0816
rs6459733	0.058	0.0068	72.7509
rs648795	0.042	0.0065	41.7515
rs649961	0.038	0.0063	36.382
rs6518681	0.083	0.012	47.8403
rs6545714	0.037	0.0065	32.4024
rs6600191	0.061	0.0085	51.5017
rs6708643	0.038	0.0064	35.2539
rs67232546	0.056	0.008	49
rs67254669	0.62	0.11	31.7686
rs6780171	0.11	0.0068	261.678
rs6821438	0.042	0.0063	44.4444
rs6884702	0.038	0.0065	34.1775
rs6885132	0.078	0.011	50.281
rs6976111	0.042	0.0073	33.1019
rs7018475	0.11	0.0072	233.41
rs7022807	0.04	0.0064	39.0625
rs702634	0.051	0.0069	54.6314
rs703972	0.071	0.0064	123.071
rs7076754	0.089	0.0087	104.651
rs7115753	0.038	0.0064	35.2539
rs7124681	0.037	0.0064	33.4229
rs71372253	0.073	0.013	31.5325
rs7178762	0.039	0.0063	38.322
rs718314	0.047	0.0073	41.4524
rs7222481	0.039	0.0068	32.8936
rs7240767	0.037	0.0065	32.4024
rs7249758	0.045	0.008	31.6406
rs72802342	0.13	0.012	117.361
rs72926932	0.083	0.011	56.9339
rs738408	0.049	0.0076	41.5686
rs74452128	0.15	0.022	46.4876
rs75253922	0.046	0.0082	31.4694
rs76263492	0.091	0.016	32.3477
rs7629630	0.051	0.0091	31.4093
rs7633673	0.038	0.0065	34.1775
rs76471882	0.087	0.015	33.64
rs7669833	0.054	0.007	59.5102
rs76895963	0.48	0.027	316.049
rs7719891	0.04	0.0072	30.8642
rs77464186	0.11	0.0088	156.25
rs7756992	0.14	0.007	400
rs77864822	0.073	0.013	31.5325
rs78408340	0.38	0.038	100
rs7867635	0.036	0.0065	30.6746
rs7987740	0.036	0.0065	30.6746
rs8010382	0.038	0.0066	33.1497
rs80147536	0.13	0.011	139.669
rs8017808	0.041	0.0073	31.5444
rs8037894	0.047	0.0064	53.9307
rs8046545	0.037	0.0066	31.4279
rs8107974	0.093	0.012	60.0625
rs840966	0.042	0.0064	43.0664
rs862320	0.042	0.0064	43.0664
rs867633	0.037	0.0065	32.4024
rs878521	0.057	0.0074	59.3316
rs917195	0.051	0.0077	43.8691
rs9267658	0.072	0.0091	62.6011
rs9379084	0.097	0.011	77.7603
rs9430095	0.036	0.0064	31.6406
rs9563615	0.042	0.007	36
rs963740	0.039	0.007	31.0408
rs9820223	0.05	0.0066	57.3921
rs9828772	0.059	0.011	28.7686
rs9860730	0.055	0.007	61.7347
rs9873618	0.066	0.007	88.898
rs9920028	0.043	0.0074	33.7655
rs9957145	0.05	0.0086	33.8021

## Sheet: Table S4f
Supplementary Table S4f. Estimates and F-statistics for instrumental variables used in Mendelian randomisation assessment of glucose with GDF15 as the outome (reverse MR)
SNP	Estimate	SE	F-statistic
rs10184004	0.021365	0.0030757	48.2523
rs10305492	0.08574	0.012133	49.9379
rs10937719	0.025048	0.0031008	65.2527
rs10965247	0.035386	0.0039679	79.5319
rs11039165	0.021119	0.0034002	38.5778
rs11248926	0.02748	0.0042263	42.2778
rs11257655	0.031363	0.0037237	70.9391
rs1130420	0.032216	0.0030957	108.299
rs11418239	0.025802	0.0043343	35.438
rs115128825	0.069241	0.010644	42.3172
rs11592309	0.030317	0.0042719	50.3652
rs11626777	0.020642	0.0031503	42.9338
rs116401167	0.026294	0.0044028	35.6661
rs11651755	0.019885	0.0030358	42.9047
rs11708067	0.041412	0.0035079	139.366
rs117804693	0.031009	0.0039474	61.7097
rs12555274	0.027608	0.0034993	62.2454
rs12581729	0.025338	0.0036679	47.721
rs1260326	0.033809	0.0030904	119.684
rs13002812	0.01656	0.0030292	29.8858
rs138917529	0.071399	0.012684	31.6863
rs146003472	0.066993	0.011881	31.7946
rs148527516	0.025846	0.0041596	38.6086
rs1513272	0.019017	0.0030236	39.5581
rs1574285	0.01772	0.00309	32.886
rs17036160	0.025849	0.0046926	30.3431
rs17168486	0.030044	0.0040088	56.1677
rs17331697	0.027081	0.0049402	30.0497
rs1832886	0.023078	0.0031149	54.8919
rs188575117	0.026119	0.0041406	39.7912
rs1985469	0.068867	0.0039443	304.847
rs199518026	0.021512	0.0031484	46.6855
rs199700210	0.02439	0.0041467	34.5954
rs199806184	0.01862	0.0032354	33.121
rs200558343	0.036016	0.0033665	114.455
rs201175987	0.019319	0.0031756	37.0099
rs2237895	0.024824	0.0030603	65.7984
rs231362	0.017789	0.0030289	34.4932
rs2396083	0.02068	0.0032772	39.8194
rs2461385	0.036137	0.004187	74.4901
rs2519093	0.026479	0.0039082	45.9039
rs28378473	0.022485	0.0034338	42.8781
rs2842363	0.023911	0.003109	59.1499
rs2855812	0.023927	0.0034419	48.3259
rs28811643	0.026636	0.0042024	40.1738
rs340874	0.026786	0.0030518	77.0378
rs348330	0.017515	0.0031494	30.9289
rs34872471	0.066642	0.0033267	401.3
rs35323862	0.022837	0.0035478	41.4343
rs3802177	0.037759	0.0032648	133.76
rs5024233	0.023575	0.0039904	34.9036
rs537435	0.020219	0.0030591	43.685
rs560887	0.089233	0.0032893	735.943
rs59727929	0.044737	0.0059262	56.9877
rs61807822	0.019055	0.003247	34.4392
rs62075839	0.01873	0.0030392	37.9802
rs6757939	0.01956	0.0035617	30.1594
rs6767073	0.016951	0.0030217	31.4694
rs6808574	0.018846	0.0031102	36.7165
rs6918046	0.01986	0.0033047	36.1156
rs6980437	0.039338	0.003036	167.889
rs7177055	0.019945	0.0033585	35.2677
rs739846	0.031459	0.0056958	30.5057
rs76177300	0.037484	0.0067391	30.9377
rs76323047	0.031754	0.0046896	45.8485
rs7644261	0.045486	0.0033493	184.437
rs76895963	0.11517	0.011599	98.5911
rs7700417	0.020893	0.0033488	38.9245
rs7766070	0.033501	0.0034329	95.2343
rs8002606	0.030253	0.0040608	55.5026
rs80323638	0.038764	0.0050752	58.3379
rs9269431	0.025922	0.0033806	58.7962
rs932560	0.044771	0.0074265	36.3434
rs9391873	0.026249	0.0045095	33.882
rs9808924	0.022466	0.0032534	47.6844
rs9894551	0.025172	0.0044063	32.6353
rs9937521	0.022093	0.0030698	51.7952

## Sheet: Table S4g
Supplementary Table S4g. Estimates and F-statistics for instrumental variables used in Mendelian randomisation assessment of HDL with GDF15 as the outome (reverse MR)
SNP	Estimate	SE	F-statistic
rs10028284	0.0070466	0.0011547	37.241
rs10095103	0.0089883	0.00088831	102.383
rs10199876	0.0057577	0.00097242	35.0583
rs10233430	0.0081398	0.00088561	84.4778
rs1043897	0.0076102	0.00088983	73.1439
rs1044531	0.010263	0.0015543	43.5992
rs1045242	0.0061846	0.0009904	38.9944
rs1047891	0.0070452	0.00094201	55.934
rs10504477	0.0061179	0.00089298	46.9376
rs10513801	0.012195	0.0012753	91.4406
rs10517530	0.0052498	0.00090939	33.3262
rs10518976	0.015135	0.001557	94.4904
rs10750766	0.0069078	0.00096666	51.066
rs10761737	0.0064841	0.0008902	53.0547
rs10783587	0.0051368	0.00091712	31.3713
rs10798615	0.0071612	0.000879	66.3734
rs10846601	0.0076139	0.00091491	69.256
rs1086056	0.0067137	0.0012037	31.1091
rs10861632	0.0064876	0.0010166	40.7256
rs10876988	0.006408	0.00091674	48.8599
rs10955991	0.0077049	0.00094253	66.8257
rs11021232	0.0069071	0.0011465	36.2947
rs11043251	0.0049061	0.00087518	31.4252
rs11045171	0.010931	0.0011058	97.7162
rs11071373	0.012859	0.0011187	132.126
rs11075253	0.0095976	0.00095919	100.119
rs1107850	0.00718	0.00087881	66.7512
rs111518243	0.025358	0.004129	37.7173
rs111541987	0.005557	0.0009212	36.3892
rs111606268	0.015194	0.00257	34.9525
rs111626678	0.01595	0.0027221	34.3331
rs11171710	0.0053154	0.00088827	35.8082
rs111771870	0.017012	0.00093574	330.522
rs111841857	0.0071326	0.00093289	58.4568
rs111843362	0.014488	0.0020338	50.7458
rs11185603	0.0066146	0.00094148	49.3611
rs112001035	0.018874	0.0018586	103.123
rs11202154	0.0056966	0.00098641	33.3516
rs112324447	0.020697	0.0027377	57.1535
rs11254464	0.0055075	0.00088826	38.444
rs1125873	0.0064654	0.00088326	53.5814
rs112771035	0.012614	0.0016922	55.5651
rs1132274	0.0075504	0.0012069	39.1379
rs113230849	0.015167	0.001274	141.73
rs113344423	0.012175	0.0018747	42.1769
rs113562761	0.012967	0.0022265	33.9183
rs113608151	0.018822	0.0026185	51.6686
rs113761591	0.0068191	0.001096	38.7109
rs113829875	0.0070842	0.00090444	61.3511
rs113855596	0.0067474	0.0009398	51.5468
rs11429307	0.012217	0.0011256	117.804
rs11432038	0.0059131	0.001025	33.28
rs11434143	0.014546	0.0011382	163.324
rs115177000	0.021596	0.0021072	105.035
rs115298177	0.018279	0.0023514	60.4299
rs1154447	0.0057944	0.00089565	41.8543
rs115493313	0.062478	0.0026941	537.807
rs115727275	0.02486	0.0044358	31.4093
rs116006942	0.010256	0.0018395	31.0854
rs11614652	0.0058606	0.001051	31.0942
rs11671872	0.0057867	0.00089343	41.9509
rs116843064	0.078242	0.003158	613.841
rs116857878	0.020557	0.0032157	40.8666
rs116862333	0.019192	0.0029229	43.1134
rs11687520	0.0069156	0.0011718	34.8299
rs11691486	0.006081	0.0010313	34.768
rs11693434	0.0060505	0.00099665	36.8551
rs117132825	0.022026	0.0039612	30.9185
rs117133249	0.025779	0.0023825	117.076
rs117182053	0.030613	0.0030638	99.8369
rs117198528	0.019332	0.0034528	31.3481
rs117230571	0.0096662	0.0016689	33.5468
rs117310695	0.012239	0.0018538	43.5879
rs117389878	0.026289	0.0030979	72.0134
rs117499775	0.012199	0.0022131	30.3841
rs117824386	0.021079	0.003584	34.5911
rs117880004	0.043758	0.0044963	94.7119
rs117892711	0.048078	0.003212	224.048
rs11789603	0.027332	0.0014156	372.788
rs117967973	0.0069731	0.0011009	40.1195
rs118024467	0.016374	0.0021486	58.0762
rs11878604	0.0096536	0.001726	31.2822
rs11883967	0.0052254	0.00092907	31.6331
rs11926707	0.0052981	0.0009083	34.0237
rs11989193	0.011511	0.0018313	39.51
rs12034581	0.0058784	0.00087786	44.8402
rs12146566	0.0061853	0.0011039	31.3951
rs1219446	0.0049454	0.00089084	30.8179
rs1225056	0.0054779	0.00099499	30.3103
rs12263369	0.0074785	0.00089055	70.52
rs1235105	0.0056634	0.00091417	38.3796
rs12351518	0.0079806	0.0014374	30.8259
rs12422125	0.016994	0.001382	151.208
rs12485478	0.021742	0.0027644	61.8582
rs12510382	0.0069375	0.00088285	61.7493
rs12516065	0.0054754	0.0009346	34.3226
rs12577276	0.021918	0.0030546	51.4865
rs12592616	0.0059203	0.00097068	37.1993
rs12609437	0.0054591	0.00096382	32.0812
rs12624640	0.0068864	0.00088716	60.2533
rs12650112	0.0051852	0.0009259	31.3619
rs12686780	0.0063562	0.0011562	30.2224
rs1270076	0.006152	0.001064	33.431
rs12762056	0.0065936	0.0012035	30.016
rs12887521	0.0054396	0.00092214	34.7969
rs12921195	0.0080896	0.0013075	38.2799
rs12926107	0.0059987	0.00088119	46.342
rs12971970	0.0058129	0.0010153	32.7791
rs12984184	0.0096029	0.001572	37.3164
rs12986280	0.0058415	0.00094865	37.9172
rs13076045	0.006044	0.00088438	46.7058
rs13097947	0.0069047	0.00093409	54.6402
rs13107325	0.030334	0.0016661	331.48
rs13134992	0.0050338	0.00089437	31.678
rs13205911	0.010566	0.0013641	59.9969
rs13263073	0.0068928	0.0011464	36.1509
rs13269725	0.010618	0.0016222	42.8427
rs13336936	0.021993	0.0025808	72.6207
rs13379043	0.0077773	0.00099527	61.0627
rs1365297	0.010883	0.0011303	92.7064
rs138856939	0.021115	0.0032497	42.2178
rs1396132	0.0077757	0.0011095	49.1162
rs140201358	0.020842	0.0037395	31.0636
rs140525318	0.015031	0.0026732	31.6164
rs141469619	0.07388	0.0046311	254.499
rs1425604	0.0056501	0.00087846	41.3684
rs142664016	0.035988	0.0042988	70.0843
rs143102005	0.029253	0.0046346	39.8397
rs143474489	0.021265	0.0029638	51.4793
rs143895802	0.020886	0.0035072	35.4641
rs144023941	0.013005	0.0012047	116.537
rs144305743	0.026975	0.0038995	47.8525
rs1446585	0.0078782	0.0010535	55.9223
rs145261619	0.026684	0.0041426	41.4912
rs145546591	0.037556	0.0032555	133.083
rs146458927	0.020556	0.00268	58.8312
rs146619351	0.0445	0.0034282	168.495
rs146647793	0.023568	0.0031585	55.678
rs1468642	0.007907	0.0009227	73.4349
rs147076760	0.046295	0.0041937	121.863
rs1476161	0.00506	0.00089924	31.6628
rs147772065	0.013281	0.0023859	30.9854
rs148383135	0.033329	0.0039295	71.9399
rs148931404	0.050845	0.0029478	297.509
rs148970147	0.044502	0.0038705	132.198
rs149391121	0.021259	0.0036274	34.3475
rs150300171	0.011707	0.0021005	31.0632
rs150373264	0.017194	0.0023301	54.4509
rs150844304	0.03494	0.0028272	152.733
rs150887097	0.019438	0.0034771	31.2514
rs151115377	0.02279	0.003093	54.2911
rs1529927	0.035999	0.0022749	250.413
rs1534696	0.0074432	0.000883	71.0555
rs1672867	0.048263	0.0034037	201.06
rs16928809	0.010733	0.0015177	50.0116
rs1694068	0.0053385	0.00090286	34.9621
rs17115481	0.0060357	0.00099067	37.1191
rs17138358	0.010471	0.00089628	136.486
rs17309930	0.0080714	0.0010802	55.8328
rs17326656	0.0079285	0.0010315	59.0804
rs174566	0.021924	0.00091734	571.188
rs17572799	0.024748	0.0039517	39.2204
rs1771582	0.0051419	0.0009118	31.8015
rs17740942	0.0082506	0.0014183	33.8404
rs1779823	0.0092239	0.00093036	98.294
rs1786690	0.0074675	0.00089147	70.1677
rs1800961	0.049535	0.0025084	389.97
rs182905496	0.036827	0.0040022	84.6711
rs183195999	0.01459	0.0025525	32.6723
rs183301240	0.02643	0.0043774	36.4554
rs183731771	0.0090161	0.0015389	34.3255
rs186586197	0.018056	0.0025825	48.8835
rs186808413	0.086328	0.0041766	427.226
rs187471874	0.029598	0.0042409	48.7089
rs187544997	0.025044	0.0034977	51.2675
rs1878051	0.0057203	0.00094248	36.8378
rs188099946	0.017967	0.0028205	40.5788
rs188238483	0.024417	0.0042323	33.2837
rs188350327	0.070169	0.003356	437.166
rs188682638	0.025786	0.0036135	50.9227
rs189142021	0.010051	0.0015173	43.8809
rs189209601	0.012481	0.0020893	35.6859
rs190368852	0.046467	0.002621	314.308
rs190417791	0.027998	0.0041318	45.9172
rs190529145	0.025004	0.0021912	130.213
rs191555775	0.020943	0.0014225	216.757
rs191923869	0.0096967	0.0010241	89.6527
rs192184585	0.025356	0.0042089	36.2931
rs192451380	0.011157	0.0017598	40.1946
rs1926834	0.0049419	0.00087914	31.5989
rs192957064	0.032424	0.0039545	67.228
rs193084249	0.031125	0.0029299	112.853
rs199905062	0.015557	0.0014012	123.268
rs199953535	0.010892	0.001615	45.4852
rs199965203	0.0049857	0.00089189	31.2485
rs2001986	0.027997	0.0033583	69.4999
rs201066570	0.0080753	0.0012732	40.2276
rs2011614	0.0056402	0.00091684	37.8444
rs201220977	0.0058684	0.00089881	42.6289
rs201224580	0.014907	0.0012984	131.815
rs201641770	0.027494	0.0045713	36.174
rs202007993	0.0081472	0.0011902	46.8573
rs202149548	0.01961	0.0025485	59.2088
rs2026847	0.0057359	0.00098408	33.9737
rs2035403	0.0076342	0.00089375	72.9617
rs204474	0.015992	0.00091711	304.062
rs204480	0.0057492	0.0010073	32.576
rs2070598	0.0062689	0.00087895	50.8691
rs2072160	0.0069377	0.0011373	37.2118
rs2111485	0.0055415	0.00089667	38.1935
rs2164123	0.0086048	0.0013565	40.2385
rs2167750	0.0081646	0.00087878	86.3196
rs2175766	0.0052346	0.00087887	35.4746
rs2229616	0.020866	0.0031166	44.8246
rs223501	0.0059859	0.0010088	35.2086
rs223823	0.016617	0.0019804	70.4043
rs2256609	0.011611	0.0011177	107.917
rs2268840	0.0061207	0.0010429	34.4443
rs2269340	0.010844	0.0016271	44.4171
rs2278426	0.032862	0.0024095	186.009
rs2281279	0.0058203	0.00095156	37.4126
rs2281718	0.022975	0.00089979	651.972
rs2297402	0.026125	0.0029894	76.3738
rs2298214	0.0059207	0.00089344	43.9152
rs2298632	0.0060137	0.00089225	45.4266
rs2303700	0.0057771	0.00095058	36.9354
rs2307111	0.0071359	0.00089776	63.1796
rs235314	0.0070696	0.0008793	64.6421
rs241776	0.005493	0.0008919	37.9304
rs2425737	0.0060604	0.0010294	34.6605
rs2428549	0.0050335	0.00090421	30.9886
rs2431109	0.00511	0.00088192	33.5725
rs2435307	0.0064901	0.00087781	54.664
rs2447589	0.0060089	0.001063	31.9539
rs2494748	0.01055	0.00090232	136.705
rs2513877	0.0072152	0.0011269	40.9945
rs251465	0.006062	0.0010206	35.2794
rs254559	0.0050934	0.00089239	32.5766
rs2642438	0.01024	0.00095681	114.538
rs268	0.097122	0.0032538	890.95
rs2700892	0.0057405	0.00088018	42.536
rs2721954	0.012209	0.00088639	189.719
rs2723065	0.0052285	0.00090533	33.3534
rs2740488	0.027718	0.0009931	779.001
rs2776937	0.0066677	0.0010264	42.2006
rs2777803	0.019973	0.0014666	185.466
rs2792751	0.013831	0.00098295	197.99
rs2800710	0.0076666	0.00087662	76.4862
rs282146	0.0052558	0.00090367	33.8266
rs28362901	0.010168	0.0015481	43.1393
rs2852095	0.0056605	0.00093853	36.3759
rs28550053	0.012383	0.0011592	114.113
rs28556815	0.014488	0.001513	91.6936
rs28581361	0.0064435	0.0011412	31.8801
rs28582881	0.0054216	0.00098606	30.2307
rs28623088	0.0095194	0.0009136	108.569
rs2862954	0.0050203	0.0008766	32.7987
rs2868764	0.0062765	0.00087896	50.9914
rs28690720	0.026399	0.0012791	425.957
rs287	0.042088	0.0010174	1711.33
rs28742908	0.012113	0.00089691	182.392
rs289751	0.041328	0.002116	381.467
rs2923078	0.0065279	0.0009716	45.1411
rs2925979	0.013799	0.00095432	209.077
rs2943645	0.016003	0.00091535	305.653
rs2963472	0.0070931	0.0010744	43.5853
rs296886	0.0062664	0.0010679	34.433
rs3184504	0.0093221	0.00087649	113.118
rs329997	0.0055997	0.00099631	31.5893
rs333947	0.011767	0.0012275	91.8943
rs33918808	0.016311	0.0025722	40.2116
rs34138141	0.0077915	0.000973	64.1234
rs34255979	0.012926	0.0013504	91.6228
rs34421596	0.0096566	0.0010047	92.3795
rs35240997	0.0076824	0.001069	51.6462
rs35324223	0.0067656	0.001166	33.6679
rs35493868	0.014057	0.001089	166.621
rs35693910	0.0094766	0.0010015	89.5371
rs357904	0.0090543	0.0015987	32.0757
rs35847578	0.006212	0.00093848	43.814
rs35980001	0.046738	0.0010734	1895.91
rs36048503	0.0048707	0.00088262	30.4534
rs36057735	0.011886	0.0010905	118.801
rs367070	0.015941	0.0010467	231.946
rs367677	0.0060242	0.0010271	34.4012
rs3732356	0.012212	0.0017873	46.6851
rs3740688	0.0088163	0.000881	100.143
rs3749748	0.0063462	0.0010183	38.8397
rs3790106	0.011455	0.0012124	89.2685
rs3803800	0.0084824	0.0010721	62.5989
rs3814883	0.0065124	0.00087943	54.8377
rs3822856	0.0062671	0.0008941	49.1316
rs384973	0.0051376	0.00090638	32.1292
rs3996350	0.012145	0.00088298	189.188
rs40270	0.011755	0.0010829	117.833
rs41173	0.0059184	0.00089769	43.4666
rs41292412	0.025444	0.0040159	40.1426
rs4149307	0.024324	0.001216	400.132
rs4239651	0.0097607	0.0010777	82.0288
rs429358	0.026875	0.0012058	496.76
rs4399666	0.0053947	0.00088031	37.5546
rs4492872	0.0052001	0.0009078	32.8128
rs4544515	0.0052021	0.00088685	34.4078
rs4573621	0.01166	0.0011425	104.156
rs4599108	0.0055337	0.00088681	38.9377
rs4675083	0.0056871	0.00094894	35.9173
rs4711702	0.0082073	0.0010254	64.064
rs4714068	0.0049966	0.00087823	32.3692
rs4742937	0.0059832	0.0010032	35.5707
rs4775075	0.0093873	0.0016014	34.3623
rs4783961	0.036735	0.00087358	1768.3
rs4802113	0.0050991	0.00088169	33.4469
rs4803759	0.0077948	0.00095409	66.7469
rs4805881	0.008236	0.00092856	78.6706
rs4820324	0.0073622	0.00088833	68.6857
rs483011	0.011989	0.0020867	33.01
rs4871603	0.014968	0.00092203	263.534
rs4913534	0.0065572	0.00097788	44.9641
rs4930352	0.0069295	0.0008918	60.3766
rs4939883	0.031703	0.0011376	776.643
rs4946954	0.0076732	0.00093174	67.8209
rs4969179	0.011089	0.00089658	152.97
rs4986970	0.030114	0.0023876	159.079
rs501776	0.005919	0.00091256	42.0701
rs5093	0.027254	0.0032506	70.2965
rs532436	0.008468	0.0011317	55.9885
rs55665473	0.010477	0.0010273	104.011
rs55719615	0.0072078	0.0009638	55.9283
rs55752345	0.0054224	0.00096032	31.8824
rs55781197	0.023612	0.0013738	295.405
rs55833463	0.0059906	0.0010935	30.0126
rs558971	0.0065183	0.00087885	55.0097
rs56090699	0.0075096	0.00096366	60.7276
rs56271783	0.019066	0.00212	80.8812
rs564476	0.010451	0.0016589	39.6895
rs56959712	0.015011	0.0010754	194.84
rs57269837	0.010008	0.00091198	120.427
rs5750673	0.0068627	0.00097843	49.1961
rs577525	0.0055414	0.00088376	39.3161
rs58473820	0.010444	0.00090391	133.501
rs5891	0.027435	0.0041821	43.0349
rs59104589	0.0059893	0.00091214	43.1151
rs595767	0.005331	0.00087802	36.8645
rs597316	0.0077614	0.00094131	67.9853
rs59781045	0.029727	0.0017469	289.578
rs60536263	0.0081787	0.0013579	36.2771
rs6073958	0.025831	0.0010973	554.156
rs6123685	0.0059077	0.0010066	34.4447
rs61269071	0.0051124	0.00090298	32.0548
rs61352607	0.012569	0.00102	151.845
rs61781290	0.0068513	0.0009928	47.6236
rs61941677	0.02119	0.0013359	251.602
rs62035543	0.018522	0.0014912	154.278
rs62428831	0.0080861	0.0012707	40.4941
rs62486442	0.0051921	0.000942	30.3798
rs632058	0.0053888	0.00091008	35.0611
rs635769	0.0076205	0.00090649	70.6709
rs646776	0.011776	0.0010533	124.995
rs6468266	0.0052842	0.00089536	34.8308
rs6478851	0.0057166	0.0010248	31.117
rs6495162	0.0051964	0.00090939	32.6516
rs6499120	0.016961	0.0026361	41.398
rs6541284	0.0084176	0.0014019	36.0531
rs6542680	0.0084359	0.0011508	53.7357
rs6554195	0.0061663	0.00087583	49.5689
rs6590207	0.0056502	0.00099798	32.0541
rs66520525	0.0073473	0.00089514	67.3711
rs6664374	0.00621	0.00092364	45.2041
rs66781087	0.0091034	0.00088012	106.985
rs6682423	0.0053079	0.00091658	33.5355
rs676210	0.023626	0.001086	473.283
rs6762415	0.0058606	0.00088035	44.3173
rs6792892	0.0091188	0.00087737	108.021
rs6800707	0.0092337	0.001117	68.3353
rs68160490	0.0050705	0.0009114	30.9516
rs686030	0.019401	0.0012583	237.728
rs690	0.005806	0.00097574	35.4067
rs7036107	0.0050926	0.00089299	32.5227
rs703966	0.0064725	0.00088816	53.1082
rs7099835	0.0077302	0.0012805	36.4437
rs71053856	0.0057398	0.0009605	35.7107
rs71116570	0.0090475	0.0013329	46.0747
rs7121538	0.0086909	0.001266	47.1262
rs7129244	0.0081805	0.00090835	81.1061
rs7133378	0.014259	0.00094301	228.636
rs7134150	0.012035	0.0017536	47.1011
rs71478653	0.024179	0.0026586	82.7124
rs7170463	0.0078749	0.00094753	69.0723
rs7193549	0.0076009	0.0011654	42.5383
rs7245642	0.0069743	0.00098093	50.5505
rs72647336	0.016163	0.0020277	63.5384
rs72663520	0.016533	0.0010436	250.978
rs72729582	0.010158	0.0017194	34.903
rs72786756	0.047486	0.0028962	268.828
rs72786770	0.020527	0.0036561	31.5221
rs72801474	0.0091778	0.0015104	36.9227
rs72823014	0.012805	0.0013137	95.0094
rs72836561	0.059017	0.002491	561.315
rs72924290	0.014511	0.0025046	33.5674
rs72926946	0.0067415	0.00095911	49.4056
rs7298463	0.0081483	0.0011655	48.8776
rs7298751	0.017288	0.0013277	169.547
rs7308864	0.0095117	0.00087436	118.341
rs7316011	0.0050587	0.00087858	33.1524
rs73221948	0.0057386	0.0010042	32.6566
rs73243877	0.0099164	0.0011723	71.5534
rs73420594	0.012851	0.001637	61.6278
rs738409	0.0060731	0.0010624	32.6772
rs7412	0.029203	0.0016082	329.742
rs74328314	0.009614	0.0016992	32.0125
rs74369986	0.015094	0.0026552	32.3157
rs74419430	0.0058682	0.00088989	43.4848
rs74456742	0.013885	0.0023855	33.8792
rs74518630	0.025572	0.0034361	55.3857
rs74676521	0.012568	0.0022378	31.542
rs7488780	0.0063458	0.0010896	33.9187
rs75033629	0.015505	0.0024622	39.6549
rs75054794	0.011006	0.0020082	30.0362
rs7522056	0.005492	0.00092624	35.1572
rs754984	0.0099023	0.001748	32.0914
rs7562358	0.0057416	0.00087537	43.0212
rs7609431	0.0051037	0.00092741	30.2849
rs76287671	0.0065075	0.0011176	33.9044
rs76299088	0.022398	0.0020511	119.246
rs76428106	0.021886	0.0040035	29.885
rs76602912	0.017508	0.0028831	36.8768
rs76828578	0.031236	0.0040099	60.6797
rs76902898	0.0066717	0.0010416	41.0271
rs7725218	0.0052777	0.00092643	32.4537
rs77271869	0.011963	0.0019285	38.4805
rs7730268	0.010022	0.0016548	36.679
rs77789064	0.013633	0.0021933	38.6355
rs7779608	0.0055098	0.00094412	34.0579
rs7794796	0.0064215	0.00093848	46.8191
rs77960347	0.10917	0.0037865	831.248
rs78025076	0.020548	0.0030834	44.4099
rs7826687	0.0090131	0.00097016	86.3101
rs78349695	0.031422	0.0024707	161.744
rs7835528	0.004947	0.00089208	30.7522
rs78548599	0.014561	0.001871	60.5668
rs78849254	0.021488	0.0024693	75.7259
rs79119207	0.023053	0.0029129	62.6331
rs79600951	0.04508	0.0015139	886.693
rs7970695	0.0058277	0.00090529	41.4399
rs7978985	0.012416	0.0022284	31.044
rs798897	0.007453	0.0010098	54.4743
rs79953491	0.015354	0.001349	129.545
rs8021491	0.0050603	0.00092406	29.9883
rs80265946	0.016975	0.0020775	66.7633
rs8075019	0.0093443	0.001347	48.1236
rs8106864	0.010463	0.00087908	141.663
rs8180615	0.0050943	0.00090986	31.3487
rs830620	0.0048698	0.000888	30.0744
rs837500	0.0098407	0.00091715	115.125
rs840873	0.012736	0.0022946	30.8072
rs856420	0.0055659	0.00093164	35.6923
rs881844	0.011328	0.00092873	148.774
rs900399	0.0064368	0.0008966	51.5398
rs921919	0.016514	0.00095005	302.142
rs9274351	0.0090249	0.0011952	57.0169
rs9306	0.0052692	0.0009068	33.765
rs9355287	0.019715	0.0023357	71.2458
rs9394279	0.0076315	0.00119	41.1269
rs9399196	0.0055029	0.0008887	38.3418
rs9431827	0.0055001	0.00094618	33.7904
rs9461976	0.021962	0.0029268	56.3064
rs9469899	0.010491	0.00091637	131.067
rs9471972	0.0078226	0.0008794	79.1278
rs9505097	0.0063915	0.0011003	33.743
rs9591325	0.010121	0.001752	33.3717
rs9604045	0.0060768	0.0010539	33.2469
rs964184	0.039124	0.0012903	919.401
rs9646167	0.0051745	0.00088062	34.5271
rs9647335	0.010265	0.0011153	84.71
rs968050	0.0048727	0.00087773	30.8189
rs975935	0.0063247	0.001094	33.423
rs9826842	0.0058895	0.00091789	41.1695
rs9839852	0.005713	0.0010131	31.7998
rs9844972	0.013414	0.0017314	60.0236
rs9958316	0.0078312	0.0010078	60.3821
rs998584	0.011798	0.00087877	180.246
rs9987289	0.031661	0.0015153	436.568
rs9989419	0.058063	0.00088936	4262.3

## Sheet: Table S4h
Supplementary Table S4h. Estimates and F-statistics for instrumental variables used in Mendelian randomisation assessment of eBMD with GDF15 as the outome (reverse MR)
SNP	Estimate	SE	F-statistic
rs10013456	0.0269054	0.00236167	129.79
rs10043493	0.0144572	0.00252648	32.7444
rs10045962	0.0118535	0.00194744	37.048
rs10057211	0.0324811	0.00317075	104.939
rs10061075	0.0105028	0.00185087	32.2002
rs10128457	0.0149134	0.00186656	63.8366
rs1012933	0.0442118	0.00567228	60.7521
rs10143202	0.0301236	0.00370931	65.9519
rs10145299	0.022178	0.00186883	140.833
rs10148621	0.0153803	0.00253667	36.7622
rs10160490	0.017175	0.00271231	40.0973
rs10165846	0.0117313	0.0018362	40.8181
rs10181671	0.014082	0.00183629	58.8093
rs10186351	0.0119276	0.00183289	42.348
rs10198306	0.0110504	0.00184287	35.9556
rs10199437	0.0502724	0.00388548	167.406
rs10206992	0.0185569	0.00209983	78.0985
rs10207431	0.0148428	0.00228904	42.046
rs1022463	0.0162374	0.00232451	48.7944
rs1025333	0.0214947	0.00364727	34.7318
rs1029830	0.013492	0.00185021	53.1754
rs10399993	0.0128047	0.00227049	31.8053
rs10407062	0.0137514	0.0018672	54.2391
rs10415949	0.0128349	0.00220553	33.8656
rs10419665	0.0198865	0.00302439	43.2356
rs1042704	0.0276667	0.00225852	150.061
rs1048932	0.0350591	0.00186814	352.195
rs10505116	0.0246169	0.00305098	65.1011
rs10516794	0.0358815	0.00267274	180.23
rs1071962	0.0180629	0.00268676	45.1978
rs10753529	0.0391656	0.00338774	133.656
rs10756762	0.0213516	0.00190047	126.223
rs10765568	0.0174025	0.00190618	83.3481
rs10777415	0.0110497	0.00189225	34.0992
rs10777536	0.016493	0.00185332	79.1951
rs10783573	0.0162398	0.00197078	67.9024
rs10783618	0.0133262	0.00196145	46.1592
rs10787453	0.0130586	0.00193621	45.4871
rs10788623	0.0130968	0.00184868	50.1888
rs10790255	0.0273647	0.00213603	164.122
rs10795075	0.0162417	0.00185782	76.4286
rs10800531	0.0251006	0.00184096	185.9
rs10805874	0.0200305	0.00201394	98.9215
rs1080789	0.0180047	0.00183175	96.6138
rs10810658	0.0146996	0.00220021	44.6357
rs10816341	0.0151245	0.00238774	40.1225
rs10817895	0.0156044	0.00208675	55.9182
rs10818950	0.0135961	0.00188028	52.2858
rs10821310	0.0193076	0.00198767	94.3557
rs10842704	0.0280498	0.00217901	165.707
rs10843391	0.0136264	0.00205331	44.0406
rs10856988	0.0094092	0.00185191	25.8146
rs10876928	0.0137264	0.00207889	43.5964
rs10891324	0.0248717	0.00242779	104.952
rs10931982	0.053909	0.00218945	606.251
rs10948100	0.0123654	0.0019012	42.302
rs10962483	0.0229076	0.00366265	39.1173
rs10992489	0.0191037	0.0019358	97.3899
rs11023722	0.0531375	0.00537519	97.727
rs11023759	0.0217781	0.00265869	67.0972
rs11023993	0.0275465	0.00203596	183.06
rs11030053	0.0178327	0.00184029	93.8992
rs11042107	0.0285158	0.00248217	131.98
rs1104957	0.0110063	0.0019184	32.9158
rs11055259	0.0303075	0.00409218	54.8518
rs11057393	0.0146721	0.00195991	56.0418
rs11061814	0.0266718	0.00283067	88.7823
rs11067228	0.0156562	0.00185365	71.3374
rs11072526	0.0148727	0.00212556	48.959
rs11073930	0.0227972	0.00187018	148.592
rs11075646	0.0257461	0.00348978	54.4286
rs11076543	0.0139593	0.00216196	41.69
rs11078776	0.0124654	0.0018632	44.7604
rs11088458	0.0439458	0.00207624	448.002
rs11105553	0.0173624	0.00193451	80.5522
rs1112172	0.0160671	0.00193443	68.9873
rs11123496	0.0526364	0.00205535	655.844
rs11127656	0.0120571	0.00209406	33.1518
rs11142400	0.0125897	0.00197211	40.7538
rs111500594	0.049612	0.00627015	62.6062
rs11150786	0.0206409	0.00226528	83.0259
rs111518243	0.060767	0.00872873	48.4656
rs111528363	0.0656571	0.00621087	111.753
rs111635595	0.0401014	0.0065613	37.3542
rs11168681	0.0165084	0.00228918	52.0056
rs11175835	0.0228987	0.0020409	125.886
rs11185677	0.0181013	0.00257001	49.6078
rs11191189	0.012387	0.00203182	37.1674
rs111931570	0.0537611	0.00845041	40.4744
rs11196171	0.0300324	0.00228691	172.457
rs111970335	0.0478538	0.00736245	42.2462
rs112020532	0.0405137	0.00929161	19.0117
rs112069922	0.0835738	0.00431056	375.901
rs112073168	0.037428	0.00565633	43.7848
rs112134840	0.0431208	0.00626618	47.3552
rs112143398	0.0260779	0.00378598	47.4448
rs11214440	0.0190937	0.00274357	48.4338
rs11215638	0.0233462	0.00208126	125.829
rs112158599	0.0394758	0.00676702	34.0304
rs11228240	0.0426866	0.0020576	430.389
rs11231740	0.0127928	0.00184054	48.3104
rs112417857	0.0507664	0.0082353	38.0009
rs11242735	0.0170071	0.00214952	62.6005
rs112488223	0.0234764	0.00313393	56.1157
rs11259979	0.0137024	0.00201726	46.1391
rs112601948	0.0168871	0.00249528	45.8006
rs1126930	0.039674	0.00495882	64.0111
rs112766772	0.0167911	0.00223346	56.52
rs112948778	0.0410056	0.00724074	32.0716
rs113133867	0.0538819	0.00855338	39.6835
rs113150176	0.03273	0.00490676	44.4941
rs113246437	0.0529796	0.00683131	60.1464
rs1133400	0.0305529	0.00221634	190.034
rs113441737	0.024375	0.00357871	46.3913
rs113896694	0.0207482	0.00290951	50.8535
rs113951080	0.0198254	0.00218919	82.0119
rs114036493	0.0544898	0.00874154	38.8557
rs114667987	0.0405383	0.00594651	46.4736
rs115035921	0.0292141	0.00433939	45.3239
rs115079384	0.0469848	0.00535414	77.0079
rs115238300	0.0272582	0.00440348	38.318
rs115333144	0.0687011	0.00736425	87.0303
rs11576138	0.0151666	0.00210614	51.8564
rs11576308	0.0153447	0.00188196	66.4808
rs11580207	0.0118259	0.00199169	35.2553
rs11584380	0.0221973	0.00184428	144.859
rs115876892	0.0638845	0.00920935	48.1208
rs115939587	0.0452642	0.00625163	52.4232
rs115979215	0.0405274	0.00488661	68.7832
rs1159798	0.0641807	0.0022139	840.413
rs1159846	0.0113723	0.00185543	37.5671
rs11615765	0.0193885	0.00303257	40.8758
rs116228246	0.0865451	0.00612502	199.65
rs11628381	0.0258167	0.00264105	95.5539
rs11629124	0.028229	0.00328798	73.7111
rs11643240	0.0153582	0.00209795	53.5908
rs11657636	0.0518107	0.00201168	663.317
rs11668064	0.0340146	0.00200626	287.446
rs116697020	0.0363236	0.00616364	34.7299
rs116784299	0.0311416	0.0047633	42.7431
rs116795853	0.0420853	0.00577537	53.1008
rs116918730	0.0393291	0.00445365	77.9823
rs11693007	0.014879	0.00212152	49.1873
rs11695471	0.0180151	0.00194624	85.6802
rs116982128	0.0370256	0.00607069	37.1987
rs11703067	0.0216849	0.00345816	39.321
rs117064273	0.0704966	0.00919037	58.8397
rs117079700	0.0464291	0.00663557	48.958
rs117111740	0.111804	0.00575562	377.338
rs117113885	0.0297746	0.00347444	73.4382
rs117114162	0.0420424	0.0061865	46.1833
rs11712061	0.0125805	0.0018879	44.4056
rs117124857	0.0753168	0.00643509	136.985
rs117154265	0.0670301	0.0085278	61.7825
rs117154502	0.0224864	0.00381291	34.7798
rs11729023	0.0250765	0.00284297	77.8017
rs117302691	0.0650849	0.00701679	86.0367
rs11731267	0.0195252	0.00273707	50.8884
rs117322608	0.0587098	0.00830308	49.9969
rs117323365	0.0306338	0.00451343	46.0668
rs11742241	0.015223	0.00184569	68.0273
rs11744543	0.0168013	0.00252044	44.4358
rs117465239	0.0829524	0.00839137	97.722
rs117481343	0.129348	0.00565544	523.102
rs117495909	0.0714551	0.00908738	61.8286
rs11754632	0.0126345	0.00184228	47.0332
rs11761905	0.0144075	0.00219343	43.1449
rs11763267	0.0206505	0.00230285	80.4137
rs11765046	0.0100402	0.00191247	27.561
rs11773123	0.0352454	0.00279065	159.512
rs11773289	0.0146944	0.00252227	33.9407
rs11781741	0.0121798	0.00200369	36.9504
rs117866066	0.0251212	0.00309098	66.0524
rs117924758	0.0434999	0.00617306	49.6564
rs118024467	0.0272845	0.00452242	36.3991
rs118072965	0.046444	0.00711561	42.6025
rs118115924	0.198518	0.00856613	537.069
rs11870594	0.0133342	0.00186471	51.1342
rs11875132	0.0191603	0.00188426	103.401
rs11880992	0.0166909	0.00188817	78.1407
rs1188292	0.0167786	0.00246272	46.4175
rs11908441	0.0172305	0.00288622	35.6399
rs11915970	0.0441141	0.00286324	237.377
rs11930058	0.0241834	0.00254722	90.1367
rs11934731	0.0358039	0.00198362	325.794
rs11946956	0.0178276	0.00198422	80.7246
rs11955703	0.0117223	0.00191119	37.6199
rs1198588	0.0147245	0.00227088	42.0429
rs11988527	0.0137945	0.00229088	36.2583
rs11992435	0.0271945	0.00401476	45.8821
rs12041612	0.0311478	0.00394041	62.4844
rs12042197	0.0129427	0.00215829	35.9609
rs120436	0.0113439	0.00185767	37.2896
rs12063539	0.0141386	0.00215108	43.2016
rs1206751	0.0164213	0.00186514	77.5162
rs12082601	0.0235757	0.00203545	134.155
rs12109268	0.034542	0.00451556	58.5156
rs12124126	0.019753	0.00194344	103.306
rs12127020	0.0173173	0.00234829	54.3822
rs12133895	0.0113896	0.0021585	27.8428
rs12134534	0.0243533	0.00186617	170.299
rs12149673	0.0287765	0.00202001	202.941
rs12202736	0.0377533	0.00708603	28.386
rs12213392	0.0163616	0.00185128	78.1101
rs12216123	0.0156083	0.00228494	46.6618
rs1227733	0.0133317	0.00235456	32.0591
rs12290699	0.0132089	0.00218195	36.6474
rs1230402	0.0260167	0.00355141	53.6664
rs12318075	0.0164405	0.00251515	42.727
rs12340775	0.0420981	0.00415604	102.604
rs12372718	0.0148156	0.00187738	62.2779
rs12373539	0.0285865	0.00290887	96.5769
rs12450901	0.013187	0.00207334	40.453
rs12452440	0.018347	0.00187049	96.2098
rs12460389	0.0268479	0.00248859	116.39
rs12466865	0.013011	0.00193112	45.3945
rs12469063	0.0180028	0.00213697	70.9714
rs12485244	0.016987	0.00188377	81.3163
rs12545602	0.0211702	0.002771	58.3683
rs12571494	0.0159339	0.00184907	74.257
rs12614608	0.0162	0.0020514	62.3633
rs12614998	0.0183976	0.00224107	67.3925
rs12616772	0.0114877	0.00192285	35.6924
rs12621416	0.0238984	0.0023084	107.18
rs12631392	0.024943	0.00296154	70.9353
rs12666817	0.0193263	0.00254465	57.6821
rs12682164	0.0160326	0.0020184	63.0948
rs12691801	0.0103628	0.00194533	28.3771
rs12693960	0.0138742	0.00191602	52.4343
rs12706321	0.0684537	0.00472636	209.768
rs12706339	0.0883491	0.00244243	1308.46
rs12732817	0.0174564	0.00241	52.4657
rs12751610	0.0610513	0.00240176	646.146
rs12756373	0.020704	0.00324327	40.7514
rs12760606	0.0174463	0.00203731	73.3318
rs12792480	0.0142354	0.00192669	54.5903
rs12803956	0.0119995	0.00193022	38.6467
rs12811685	0.0176709	0.0019485	82.2463
rs12820350	0.022549	0.00234684	92.3183
rs1286075	0.0305343	0.00246569	153.355
rs12932885	0.0240128	0.00185479	167.609
rs12943370	0.0134905	0.00195	47.8616
rs12951408	0.0127905	0.00186858	46.8545
rs12954782	0.0164006	0.00210211	60.8707
rs12980839	0.0184522	0.0021062	76.7533
rs13016532	0.010823	0.00197585	30.0046
rs13017811	0.0332515	0.00243686	186.192
rs13043599	0.0402106	0.00357189	126.732
rs13056435	0.0347992	0.00335444	107.621
rs13070996	0.014301	0.00205872	48.2545
rs13088318	0.0152577	0.00195249	61.0661
rs13131125	0.0140031	0.00199453	49.291
rs13133616	0.0189451	0.00212243	79.6759
rs13138431	0.0137117	0.00209754	42.7329
rs13157042	0.0290978	0.00303485	91.9276
rs13179493	0.0295407	0.00205603	206.435
rs1318232	0.0164179	0.00184629	79.0743
rs1318236	0.0212927	0.00183665	134.403
rs13189275	0.0195907	0.00185422	111.629
rs13199674	0.0188436	0.00184233	104.615
rs13261573	0.0171423	0.00214123	64.0931
rs13267351	0.0165363	0.0025092	43.4316
rs13276824	0.03744	0.0041624	80.9066
rs13303010	0.0216679	0.0032042	45.7293
rs13312612	0.0127376	0.0023334	29.7987
rs13316065	0.0243613	0.00200031	148.322
rs13334558	0.0181432	0.00227669	63.5068
rs13356174	0.0260108	0.00503366	26.7017
rs13379119	0.0164917	0.00186108	78.5237
rs13414140	0.0265694	0.00287598	85.3477
rs13429049	0.0152649	0.00197101	59.9805
rs13447258	0.0257512	0.00388009	44.0465
rs134613	0.0428614	0.00195285	481.72
rs1352755	0.0118286	0.00186697	40.1414
rs136195	0.0152558	0.00196894	60.0351
rs137926455	0.0518253	0.00734827	49.7409
rs137935092	0.0575729	0.00889845	41.8608
rs137949120	0.0605087	0.00614769	96.875
rs138502219	0.0935766	0.00704664	176.348
rs1386625	0.0455185	0.00313806	210.404
rs138783171	0.0327914	0.00553267	35.1278
rs138818878	0.0577473	0.0055638	107.726
rs139232959	0.0598133	0.00952924	39.3984
rs139326808	0.0610256	0.00851561	51.3562
rs139489034	0.0378489	0.00537809	49.528
rs139497	0.0203594	0.00201648	101.939
rs139603701	0.105751	0.007397	204.389
rs139718281	0.0466973	0.00842193	30.744
rs139929333	0.0373539	0.0037765	97.8347
rs1400684	0.0156454	0.0019436	64.7977
rs140587182	0.0510722	0.00914326	31.2009
rs140676008	0.0476008	0.00659195	52.1436
rs140770612	0.059438	0.00877685	45.8618
rs141054658	0.0440185	0.00695644	40.0402
rs141399219	0.0334218	0.00570491	34.3212
rs1414660	0.0812901	0.00232217	1225.43
rs1416890	0.0367516	0.00598525	37.704
rs141778601	0.0444598	0.00676837	43.1486
rs141795717	0.22756	0.00724912	985.42
rs141886990	0.0662002	0.00519841	162.173
rs1420578	0.0226468	0.00194799	135.158
rs142259034	0.0480014	0.0060568	62.8089
rs142307065	0.108235	0.00909147	141.732
rs1423352	0.0116668	0.00186783	39.0147
rs142453721	0.0293126	0.00432868	45.8562
rs1425416	0.0126105	0.00191838	43.2111
rs1428968	0.0234504	0.0024062	94.9811
rs143043662	0.0685088	0.00867629	62.3483
rs1436138	0.020206	0.00193195	109.388
rs143907018	0.0545507	0.00799117	46.5994
rs144136543	0.0449797	0.00588684	58.3806
rs144168191	0.0879065	0.0097659	81.0247
rs144190871	0.0760593	0.00886632	73.5898
rs144246056	0.0592853	0.00919282	41.5907
rs144412371	0.0388468	0.0048819	63.3188
rs144633847	0.0535518	0.00685437	61.0398
rs144768592	0.0538894	0.00915071	34.6814
rs1450949	0.0125361	0.00222922	31.6242
rs145118278	0.0330447	0.00596352	30.7042
rs145436287	0.0895884	0.0085492	109.813
rs146206942	0.0543791	0.00831242	42.7966
rs1463598	0.0152865	0.00192412	63.1178
rs1464807	0.0209771	0.00296038	50.2107
rs1465305	0.0144857	0.00199148	52.9087
rs147394314	0.0457778	0.00590697	60.0593
rs147745092	0.0623468	0.007901	62.2679
rs147915133	0.0535409	0.00833597	41.2533
rs147947692	0.0464824	0.00743855	39.0482
rs148146170	0.0546846	0.00741291	54.4193
rs148247260	0.0382447	0.00628206	37.0628
rs149002425	0.07054	0.00661486	113.718
rs149112519	0.0781652	0.00967831	65.2271
rs149187988	0.0420978	0.00653662	41.4775
rs149685227	0.0509503	0.00645174	62.3648
rs1498507	0.0138345	0.00186011	55.3159
rs1498785	0.0191475	0.00233941	66.9902
rs1502201	0.017271	0.0021076	67.1519
rs150223025	0.0949077	0.00942104	101.486
rs150226004	0.0720107	0.00826471	75.917
rs150445982	0.0959681	0.00636095	227.62
rs150892764	0.0472494	0.00823899	32.8885
rs150902971	0.127182	0.00841844	228.238
rs150971826	0.0694777	0.0089326	60.4972
rs151217436	0.0509803	0.00785221	42.1523
rs151299592	0.0656499	0.00897831	53.4662
rs1516943	0.0250882	0.00198906	159.09
rs1531311	0.0184642	0.00310099	35.4536
rs1533142	0.0233703	0.00220548	112.285
rs1535570	0.0129072	0.00186266	48.0172
rs1545161	0.0250499	0.0018586	181.652
rs1548607	0.0180626	0.0019419	86.5181
rs1550270	0.0161526	0.00201971	63.9598
rs1569414	0.0182241	0.00211608	74.17
rs1575667	0.0241575	0.00288866	69.9377
rs159407	0.0169109	0.00185809	82.8323
rs1609829	0.0126815	0.00201734	39.5169
rs1622638	0.0153895	0.00188299	66.7964
rs163433	0.0113415	0.00184535	37.7732
rs1671031	0.0121568	0.00191855	40.1506
rs167203	0.0130764	0.00225938	33.4964
rs167365	0.0188056	0.00188365	99.6722
rs16878921	0.033872	0.0031223	117.688
rs169068	0.0110736	0.00185655	35.5766
rs16908520	0.0189344	0.00239113	62.7042
rs16927849	0.0170428	0.00263449	41.8494
rs16956546	0.0541407	0.00761967	50.4865
rs16958048	0.0223458	0.00397802	31.5543
rs16961965	0.0266417	0.00211385	158.846
rs17033059	0.0151963	0.00248956	37.2589
rs17034046	0.0171102	0.00259209	43.5723
rs17063286	0.0423528	0.0068265	38.4918
rs1706708	0.0285921	0.00198005	208.516
rs17081679	0.0464096	0.00328258	199.887
rs17091332	0.0116099	0.00225875	26.4193
rs1709851	0.011014	0.00193883	32.2709
rs17115088	0.0970419	0.00690908	197.278
rs17143285	0.0627084	0.00495024	160.472
rs1716169	0.0193655	0.00231098	70.2207
rs17173698	0.046146	0.00586104	61.9896
rs17184382	0.0187013	0.00187535	99.4441
rs17216685	0.0190429	0.00253386	56.4808
rs17227210	0.0180782	0.00265657	46.3093
rs1724298	0.0330732	0.00292755	127.627
rs17250080	0.0198457	0.00277114	51.288
rs17265513	0.0333287	0.00231973	206.425
rs17278798	0.0117626	0.00191317	37.8007
rs17284876	0.114246	0.00238386	2296.79
rs173175	0.00971682	0.0018399	27.8907
rs17407658	0.0160317	0.00183155	76.6164
rs17426970	0.019532	0.00241679	65.3154
rs17451107	0.0286594	0.00190266	226.888
rs174528	0.0158783	0.00189945	69.8799
rs17507577	0.0598153	0.00351676	289.294
rs17510563	0.0313226	0.00315998	98.2533
rs17514740	0.00908104	0.00183247	24.5583
rs17537246	0.029737	0.00379577	61.3754
rs17561950	0.0147498	0.00186234	62.727
rs17582206	0.0106139	0.00193345	30.1359
rs17602572	0.0260544	0.00187747	192.582
rs17650301	0.0174081	0.00202519	73.8875
rs17679410	0.0251958	0.0022263	128.082
rs17680862	0.0784676	0.00577299	184.748
rs17686786	0.0247336	0.00419522	34.7588
rs1771982	0.00940308	0.00184841	25.8788
rs17733713	0.0184922	0.00301356	37.6546
rs1777277	0.0108505	0.00184474	34.5963
rs17792917	0.0140559	0.00213812	43.2169
rs1779455	0.0161114	0.00189842	72.0248
rs17825134	0.0248819	0.0036415	46.6881
rs1799387	0.0113961	0.00189298	36.2427
rs1805097	0.0207767	0.00197096	111.121
rs182852812	0.0508787	0.00818009	38.6862
rs183885	0.01494	0.00196563	57.7694
rs184010510	0.0534978	0.00784267	46.5312
rs184708579	0.0534057	0.00886925	36.2578
rs184803106	0.162124	0.00886036	334.805
rs185235400	0.0576519	0.00692039	69.4011
rs186020792	0.0430492	0.00647588	44.1909
rs186893495	0.0519725	0.00794515	42.7901
rs1878526	0.0634213	0.00221836	817.347
rs1880842	0.0145467	0.00206128	49.8029
rs1881706	0.0183554	0.00201621	82.8812
rs1884051	0.0163824	0.00193912	71.3749
rs188682638	0.0499474	0.00763927	42.7486
rs188967368	0.130503	0.00817934	254.568
rs1891198	0.0228001	0.00183113	155.037
rs1897468	0.0127764	0.00201255	40.3017
rs189841387	0.0487257	0.00651349	55.9614
rs190144	0.0360678	0.0021204	289.337
rs1904398	0.0152802	0.00184994	68.2249
rs1907310	0.0209684	0.00247881	71.5557
rs1907382	0.0252889	0.00343662	54.1498
rs191927852	0.0504617	0.00679746	55.11
rs192604984	0.035796	0.0075617	22.4094
rs1935428	0.0116596	0.00210229	30.7597
rs1976489	0.0197166	0.00211079	87.2517
rs1977576	0.0231942	0.00188519	151.373
rs1983853	0.0167985	0.00289131	33.7561
rs1991431	0.0178361	0.00185988	91.9666
rs2001131	0.0183897	0.00241893	57.7967
rs2009622	0.0140845	0.00200159	49.5145
rs2023843	0.03698	0.00347658	113.143
rs2027442	0.0237465	0.0033246	51.0176
rs2029999	0.013186	0.00198988	43.9109
rs2033149	0.0188415	0.00187074	101.439
rs2040666	0.0285514	0.00200582	202.615
rs2044831	0.0301366	0.00216964	192.936
rs2052480	0.0269752	0.00204806	173.478
rs2053769	0.02038	0.00185433	120.791
rs2066829	0.0259225	0.00193259	179.918
rs2069442	0.0193391	0.00208977	85.6398
rs2083244	0.0196536	0.00187764	109.562
rs2091624	0.0250404	0.0030728	66.407
rs2110540	0.00973138	0.00186747	27.1545
rs211839	0.0107024	0.00195232	30.0511
rs212417	0.0291676	0.00194657	224.523
rs2135963	0.0171223	0.00188186	82.7846
rs2144023	0.0119761	0.00188571	40.3349
rs2146778	0.0199191	0.00218785	82.8904
rs215226	0.024173	0.00189063	163.474
rs2155572	0.011988	0.00187249	40.9878
rs2174633	0.0157636	0.00209579	56.5738
rs2177349	0.0196211	0.00247714	62.7402
rs2189452	0.0641393	0.00684677	87.756
rs2192287	0.0831675	0.00856716	94.2396
rs2201150	0.0141427	0.00192046	54.2318
rs2204015	0.0136785	0.00227972	36.0009
rs2205270	0.023638	0.00273526	74.6834
rs2216949	0.0290342	0.00283127	105.162
rs2227607	0.0205264	0.00291757	49.4975
rs2272443	0.0217871	0.00222548	95.841
rs2290436	0.01152	0.00189789	36.8437
rs2292852	0.0128682	0.00190035	45.8531
rs2294358	0.0355266	0.00412508	74.1724
rs2297374	0.00991213	0.00189267	27.4274
rs2302407	0.0160084	0.00187488	72.9036
rs2303696	0.0152683	0.00191978	63.2526
rs2326201	0.0154892	0.00184982	70.1131
rs2366163	0.0127835	0.00192425	44.1343
rs2376600	0.0311292	0.00200237	241.684
rs2378022	0.0188793	0.00187081	101.839
rs2385450	0.0138523	0.00197398	49.2446
rs2389218	0.00837353	0.00185457	20.3859
rs2422474	0.0136745	0.00205913	44.1017
rs2423151	0.037198	0.00194641	365.233
rs2430689	0.0160876	0.00188816	72.5947
rs243866	0.0225725	0.00211749	113.636
rs2446419	0.0567481	0.00779786	52.9605
rs2460588	0.0202949	0.00184483	121.021
rs2471032	0.0188966	0.00275866	46.9214
rs2478777	0.0175665	0.00250381	49.223
rs2491105	0.0233584	0.00220438	112.283
rs2498852	0.0104524	0.0018679	31.313
rs2504105	0.0127071	0.00186034	46.6561
rs2519093	0.0288265	0.00239495	144.874
rs2527041	0.0189242	0.00236469	64.0452
rs2530394	0.014171	0.00196126	52.2072
rs2551769	0.0125201	0.00200632	38.9417
rs2553772	0.0281833	0.00184735	232.748
rs2566752	0.0357706	0.00189687	355.613
rs2566774	0.0381624	0.00234926	263.882
rs2580319	0.0283443	0.00359309	62.2294
rs2603116	0.0142907	0.00197046	52.5983
rs2609352	0.0139528	0.00196186	50.5809
rs2637642	0.0113832	0.0018453	38.0535
rs2639576	0.0159226	0.00186424	72.9498
rs2647462	0.0333817	0.00241745	190.679
rs2675960	0.0199742	0.00184164	117.633
rs2693662	0.0135434	0.00198105	46.7374
rs2696264	0.029848	0.00219605	184.734
rs271637	0.0128595	0.00208974	37.8672
rs2729845	0.0122074	0.002044	35.6685
rs2732107	0.0284106	0.00185607	234.3
rs273557	0.0130434	0.00195943	44.3121
rs2736240	0.0172785	0.0026256	43.3067
rs2737205	0.0120971	0.00187297	41.7158
rs2737252	0.0347086	0.00205818	284.386
rs2741856	0.0746095	0.00335582	494.3
rs2745599	0.0130457	0.00184701	49.888
rs2747431	0.0197548	0.00198134	99.4094
rs2749125	0.0137291	0.00184216	55.543
rs2761884	0.0501009	0.00186962	718.099
rs2791655	0.018823	0.00204637	84.6076
rs2792433	0.0140262	0.00194548	51.9788
rs2793490	0.0334266	0.00322966	107.12
rs2799098	0.0169608	0.00239229	50.2649
rs2810587	0.0144438	0.00222216	42.2486
rs2812243	0.0212319	0.00310223	46.8414
rs2830913	0.0236343	0.00188238	157.642
rs283324	0.0254092	0.00222398	130.533
rs2834839	0.0158765	0.00246591	41.4529
rs28362709	0.0425818	0.00217204	384.337
rs28364580	0.0223685	0.00217236	106.025
rs2836613	0.0297243	0.00216395	188.681
rs28373428	0.0222698	0.00262992	71.7047
rs284200	0.0134712	0.00189753	50.4005
rs2842352	0.0172863	0.00258958	44.56
rs28428733	0.0883413	0.0070862	155.418
rs2846444	0.016786	0.00188271	79.4928
rs2855562	0.0148635	0.00183647	65.505
rs28558703	0.0120184	0.00191721	39.2965
rs28625279	0.0119845	0.00244612	24.004
rs28665840	0.0232663	0.00238446	95.2082
rs287932	0.012306	0.00217516	32.0075
rs2894101	0.016186	0.00212747	57.8832
rs2906135	0.0114749	0.00196819	33.991
rs2910274	0.0145967	0.00222915	42.8776
rs2916718	0.015743	0.00228427	47.4985
rs2925049	0.0111635	0.00185472	36.228
rs2929308	0.044408	0.00185432	573.526
rs2971887	0.0514694	0.00205727	625.915
rs2979824	0.0108108	0.00186121	33.7384
rs2982573	0.0767909	0.00185417	1715.22
rs2993426	0.0114436	0.00186743	37.5523
rs299371	0.0163229	0.00200703	66.1435
rs3008065	0.0154734	0.00195264	62.7953
rs3088225	0.0188865	0.00211357	79.849
rs3118906	0.0262712	0.00206586	161.718
rs314280	0.0133785	0.00183697	53.0409
rs314675	0.0198733	0.0027043	54.0045
rs330091	0.0187839	0.00227043	68.4471
rs33949355	0.0108662	0.00187279	33.6649
rs34008644	0.014358	0.00207745	47.7669
rs34110161	0.0161862	0.00319196	25.7143
rs341139	0.0128949	0.00193975	44.1921
rs34123233	0.0214311	0.0024232	78.2187
rs34193285	0.021805	0.00235525	85.7113
rs34233878	0.0195448	0.00312323	39.1611
rs34308190	0.026603	0.00379935	49.0278
rs34320498	0.0171048	0.00248475	47.3882
rs34324915	0.0208485	0.00191796	118.16
rs34365165	0.0144928	0.00233539	38.5111
rs344081	0.0483044	0.00281204	295.074
rs34424799	0.0154747	0.00186834	68.6013
rs34435227	0.0128854	0.0018783	47.0615
rs34587622	0.0172649	0.00292778	34.7737
rs346073	0.0266323	0.00243211	119.909
rs34778574	0.0718382	0.00484489	219.858
rs34811474	0.0131623	0.00218591	36.2576
rs34914463	0.0200036	0.00272444	53.9091
rs34917732	0.0218058	0.00339316	41.2986
rs34943367	0.0167217	0.00185296	81.4383
rs34945663	0.0148831	0.00243919	37.2302
rs34965590	0.0165231	0.00192826	73.4263
rs350132	0.0135972	0.00214981	40.0036
rs35049739	0.030517	0.00426918	51.0969
rs351988	0.0221296	0.00189899	135.801
rs35308216	0.0619564	0.00339065	333.892
rs35360258	0.013189	0.00225492	34.2107
rs35391640	0.077866	0.00520931	223.427
rs35563342	0.0145022	0.00188391	59.2581
rs35643724	0.0213006	0.00264479	64.8636
rs35657711	0.0506141	0.00223761	511.651
rs35763270	0.0158355	0.00222793	50.5197
rs35792736	0.0432033	0.00740098	34.0765
rs35988618	0.0150311	0.00205629	53.4334
rs36027301	0.0308385	0.00394776	61.0218
rs36041343	0.0366339	0.00520731	49.4925
rs368510	0.0236734	0.00195912	146.016
rs370387	0.0468543	0.00185513	637.896
rs370545	0.0128138	0.00183231	48.9055
rs373496	0.0562927	0.00851142	43.7421
rs3736175	0.033701	0.00279116	145.786
rs3744787	0.0190785	0.00266547	51.2319
rs3746660	0.00980237	0.0018687	27.5159
rs3751198	0.0120331	0.00190828	39.7622
rs3760456	0.0227806	0.00186228	149.637
rs3765971	0.0283504	0.00192587	216.703
rs3773714	0.0175959	0.0028059	39.3259
rs3774591	0.0116883	0.00198775	34.5764
rs3775133	0.0611458	0.00479453	162.645
rs3777787	0.0520223	0.0018396	799.71
rs3789848	0.0185583	0.00235416	62.1447
rs3790608	0.0389237	0.00256693	229.932
rs3807611	0.0408719	0.00195335	437.814
rs3815970	0.0143533	0.0018364	61.0898
rs38175	0.0158561	0.00200464	62.5633
rs3828559	0.0147322	0.00215476	46.7452
rs3829241	0.0319502	0.00187097	291.617
rs3829849	0.0137668	0.00191868	51.4827
rs3846500	0.0153367	0.00188978	65.863
rs3848474	0.0150619	0.0018751	64.5224
rs3858202	0.0141003	0.00188215	56.124
rs3912497	0.0309348	0.0046216	44.8033
rs399711	0.0295412	0.00312302	89.476
rs4077606	0.0177556	0.00208879	72.2572
rs4081747	0.0136563	0.00192596	50.2773
rs41266001	0.038855	0.00490866	62.6568
rs41369048	0.0189816	0.00282958	45.0009
rs4142815	0.0104377	0.00183925	32.2054
rs4143691	0.0193082	0.0019778	95.3057
rs4148149	0.0118049	0.00195354	36.5157
rs4149530	0.0113431	0.00192392	34.7608
rs42235	0.0210067	0.00199279	111.12
rs4239082	0.0151575	0.00186957	65.7312
rs42916	0.0192689	0.00211042	83.3635
rs4305309	0.073412	0.00191639	1467.46
rs4336963	0.0216017	0.00205863	110.108
rs4341955	0.0180121	0.0022596	63.5427
rs4369779	0.0171601	0.00226806	57.2441
rs437112	0.0145554	0.00187812	60.0623
rs4395467	0.0219564	0.00184817	141.136
rs4397431	0.0107229	0.00185967	33.247
rs4418639	0.0164218	0.00187602	76.6243
rs4491596	0.0172605	0.00218451	62.4308
rs4505759	0.0568166	0.00200649	801.819
rs4506565	0.0108811	0.00198556	30.0317
rs45446698	0.038929	0.00453404	73.7184
rs4553626	0.0328525	0.00555376	34.9915
rs45573936	0.0378841	0.00557347	46.2022
rs45627332	0.0180011	0.00280106	41.3003
rs4589135	0.0179922	0.0018839	91.2122
rs4649018	0.0130406	0.00188431	47.895
rs4664366	0.0109671	0.0020912	27.5038
rs4666343	0.0161519	0.002062	61.3578
rs4669522	0.0171116	0.00226385	57.1329
rs4669755	0.00932585	0.00196416	22.5436
rs4672847	0.0269523	0.00336039	64.3298
rs4677946	0.0123761	0.00227873	29.4973
rs4686419	0.0166705	0.00202248	67.9405
rs4709746	0.031752	0.00270381	137.908
rs4711750	0.0129624	0.00182879	50.2393
rs4714814	0.0325297	0.00184825	309.77
rs4739697	0.0185541	0.0019646	89.1932
rs4743930	0.0294771	0.00213721	190.228
rs4752678	0.0161702	0.00184548	76.7736
rs4783443	0.0232532	0.00339735	46.8473
rs4783866	0.0201827	0.00284683	50.2615
rs4784958	0.0168591	0.00294535	32.7639
rs4785569	0.0124893	0.00186159	45.0099
rs4796995	0.050023	0.00193616	667.509
rs4806862	0.0200669	0.00199053	101.63
rs4813806	0.0140979	0.00187918	56.2823
rs4813944	0.0240465	0.00188931	161.993
rs4836373	0.0190058	0.00185311	105.189
rs4851274	0.0122568	0.00197135	38.6569
rs4870044	0.0835511	0.0020151	1719.14
rs4870341	0.0249613	0.00258252	93.4215
rs4878008	0.0145307	0.00191109	57.811
rs488535	0.0155477	0.00203319	58.4758
rs489298	0.0126332	0.00189791	44.3073
rs4912090	0.0210051	0.0021943	91.6342
rs4918845	0.0122427	0.00220921	30.71
rs4925087	0.0108623	0.00189936	32.7061
rs4945503	0.0155966	0.00252619	38.1178
rs4945829	0.0127059	0.00193887	42.9451
rs4948786	0.0122606	0.00184986	43.9284
rs4961732	0.0262922	0.00233932	126.321
rs4964511	0.0125168	0.00184861	45.8454
rs4974186	0.023963	0.00186603	164.909
rs4979905	0.0262079	0.00240067	119.179
rs5024617	0.020079	0.00187772	114.346
rs503288	0.0181171	0.00284395	40.582
rs528738	0.0239616	0.00301085	63.3364
rs528894	0.0112318	0.00184989	36.8644
rs547251	0.0116816	0.00193736	36.3567
rs549941	0.0140643	0.00190405	54.5607
rs556429	0.0173293	0.00214887	65.0342
rs55646464	0.0117962	0.0020149	34.275
rs55704141	0.0287216	0.00188828	231.358
rs55759366	0.037671	0.00606307	38.6037
rs55877758	0.0143157	0.00213581	44.9262
rs55888531	0.0208545	0.0019577	113.477
rs56095176	0.0350597	0.00459946	58.1036
rs56151937	0.0238762	0.00257553	85.9404
rs56225285	0.0188466	0.00203241	85.9891
rs56235417	0.0320148	0.00250245	163.671
rs56241024	0.0408951	0.00408588	100.178
rs56320441	0.0243596	0.00329318	54.7154
rs56682471	0.0271138	0.00222912	147.95
rs56921221	0.0231573	0.00258667	80.1482
rs57043009	0.0528756	0.00260887	410.777
rs571356	0.0157818	0.0019608	64.7808
rs57299708	0.0265477	0.00247496	115.058
rs5735	0.0179149	0.00201059	79.3929
rs5754387	0.015804	0.00234886	45.271
rs5762769	0.017543	0.00199999	76.94
rs5770908	0.0166464	0.00198409	70.3911
rs58057291	0.0222667	0.00215848	106.418
rs58397787	0.0203474	0.0022951	78.5986
rs58553400	0.0262073	0.00417188	39.4622
rs59500178	0.0114411	0.00186824	37.5034
rs59813731	0.0211195	0.00235156	80.6594
rs59850878	0.0327298	0.0040659	64.7997
rs598699	0.0280959	0.00184546	231.78
rs59900779	0.0256049	0.00255956	100.073
rs6005930	0.038863	0.00309522	157.648
rs6008770	0.0149998	0.00277049	29.3128
rs60240458	0.010923	0.00182946	35.6482
rs602633	0.01352	0.00221606	37.2212
rs60300026	0.0121028	0.0018978	40.6697
rs603424	0.0301479	0.00246363	149.749
rs60417159	0.0127014	0.00204564	38.5518
rs60565316	0.0356312	0.00295149	145.74
rs6059412	0.0186257	0.00204401	83.0346
rs6063051	0.0303067	0.00213091	202.277
rs606704	0.0145621	0.00210014	48.0786
rs6078005	0.0355603	0.00186961	361.767
rs6081168	0.00967565	0.00186755	26.8421
rs6085574	0.0189205	0.00208484	82.3606
rs6085968	0.0184723	0.0031893	33.5468
rs608966	0.0683037	0.00198221	1187.38
rs61171454	0.0543051	0.00638056	72.4375
rs6117637	0.0183149	0.0021233	74.4023
rs6117854	0.0384374	0.00198936	373.32
rs6120804	0.0254615	0.00242533	110.211
rs612392	0.0160363	0.00305565	27.5424
rs61293802	0.0228632	0.00233173	96.143
rs613223	0.0139528	0.00198183	49.5667
rs61495751	0.031195	0.00398631	61.239
rs61735998	0.0411824	0.00588518	48.967
rs61776719	0.0191346	0.00184087	108.042
rs61777208	0.016356	0.00241511	45.8649
rs61778392	0.026433	0.00363108	52.9933
rs61780429	0.018669	0.00222523	70.387
rs61829192	0.0200927	0.00340188	34.885
rs61842422	0.0163778	0.00311214	27.6945
rs61845885	0.0136244	0.00212367	41.1586
rs61887542	0.0976075	0.00919893	112.588
rs61940555	0.0143475	0.00268446	28.5653
rs61945198	0.0123619	0.00186941	43.7282
rs62007684	0.0425588	0.00195615	473.341
rs62023883	0.0608582	0.0086449	49.5585
rs62078607	0.0427914	0.00394999	117.36
rs62078610	0.0469117	0.00652872	51.6305
rs62125328	0.0332148	0.00314573	111.486
rs62165280	0.0268193	0.00225281	141.725
rs62185095	0.0381679	0.00407058	87.9192
rs62271373	0.0283346	0.0039594	51.2124
rs62321667	0.022818	0.00284112	64.5024
rs62332075	0.0101988	0.00186121	30.0267
rs62421093	0.0136397	0.00220482	38.2704
rs62425109	0.036404	0.00399514	83.0298
rs62453052	0.0209807	0.00240343	76.2039
rs62459989	0.0175729	0.00238643	54.2237
rs62472369	0.0202256	0.00186001	118.242
rs62515432	0.0141075	0.0022859	38.0878
rs62561562	0.0160782	0.00196817	66.7344
rs62578102	0.0122033	0.00222137	30.1796
rs62621812	0.0893593	0.00664995	180.569
rs628465	0.0158264	0.00243153	42.3648
rs635084	0.0261003	0.00241192	117.102
rs640950	0.0133465	0.00185597	51.7122
rs6426839	0.0113406	0.00193621	34.3058
rs642722	0.0112311	0.00203182	30.5544
rs6433893	0.0199823	0.00199439	100.385
rs645774	0.0133297	0.00228639	33.9891
rs6467366	0.0140393	0.00229361	37.4672
rs6471752	0.0211287	0.0025875	66.6783
rs6485702	0.0347608	0.00194109	320.692
rs6493496	0.0207434	0.0021007	97.5061
rs6494856	0.017157	0.00187508	83.7227
rs6496644	0.017389	0.00284886	37.2569
rs6504675	0.0110214	0.00190664	33.4146
rs6547870	0.0204767	0.00189729	116.48
rs6554228	0.0134548	0.00187416	51.5396
rs6583866	0.0136915	0.00185878	54.2558
rs6594643	0.0146111	0.00186066	61.664
rs665632	0.0166636	0.00239418	48.4422
rs6667862	0.00959621	0.00183301	27.4075
rs6672925	0.013769	0.00206602	44.4156
rs66758084	0.0204818	0.00242782	71.171
rs66864335	0.02667	0.00220703	146.026
rs66906321	0.0151852	0.00242198	39.3097
rs6701977	0.0198834	0.00268705	54.7558
rs6715331	0.0422547	0.00522325	65.4438
rs6716216	0.0330714	0.00279646	139.858
rs67239991	0.0147382	0.00229444	41.2606
rs6741591	0.0308022	0.00489598	39.5808
rs6744364	0.011797	0.00190378	38.3981
rs6755144	0.0291461	0.00226782	165.175
rs6756935	0.014744	0.00274026	28.9499
rs67575951	0.0271135	0.00371894	53.1536
rs6767524	0.0289764	0.00387772	55.8388
rs6769511	0.0146829	0.00198776	54.5627
rs67820526	0.0149621	0.00244904	37.3244
rs6782178	0.0144077	0.00187672	58.9373
rs67924081	0.0199821	0.00208236	92.0811
rs67971665	0.0733382	0.00625583	137.433
rs6799205	0.00995098	0.0018465	29.0424
rs68058972	0.0167573	0.00236088	50.3802
rs6818461	0.0153037	0.00268995	32.3672
rs6839437	0.033192	0.00248792	177.989
rs6870556	0.0191468	0.00190964	100.529
rs687914	0.0212684	0.00211742	100.892
rs6882422	0.0288998	0.0028886	100.096
rs6885822	0.023218	0.00251604	85.1559
rs6903009	0.0150995	0.00192024	61.8321
rs6912283	0.0113744	0.0018433	38.0772
rs6926954	0.0229282	0.00197481	134.8
rs6931890	0.0458701	0.00507338	81.7456
rs6938004	0.0133415	0.00186126	51.3801
rs6939820	0.0423515	0.00214826	388.655
rs6946681	0.0131196	0.00221965	34.9359
rs6966112	0.0155806	0.00196943	62.5875
rs6977460	0.0172836	0.00207898	69.1143
rs698891	0.0356746	0.00296687	144.584
rs7000279	0.0132997	0.00210527	39.9087
rs7010865	0.0655263	0.00858297	58.2849
rs7017252	0.0165146	0.00191174	74.624
rs7022162	0.0125364	0.00213579	34.4531
rs7040344	0.0276745	0.00195032	201.348
rs7070913	0.129117	0.00299287	1861.19
rs7085041	0.0219079	0.00275701	63.1429
rs7086976	0.0265028	0.00184405	206.556
rs7090615	0.0140278	0.00190555	54.1924
rs7102	0.0203849	0.00192847	111.736
rs7103543	0.0153192	0.0018562	68.1118
rs710893	0.0256296	0.00255894	100.314
rs7117501	0.0195539	0.00241535	65.54
rs7117516	0.0200582	0.00267037	56.421
rs7117693	0.0179068	0.00280089	40.8737
rs7119412	0.0132405	0.00212147	38.9525
rs7121746	0.0567108	0.00187757	912.303
rs7122693	0.0130511	0.00185707	49.3898
rs7123749	0.0464249	0.00191723	586.345
rs7135535	0.0129379	0.00185824	48.4757
rs71367170	0.0166709	0.00325015	26.3094
rs7138742	0.0126127	0.00187032	45.4762
rs71390846	0.0399743	0.0023772	282.768
rs71420186	0.0261592	0.00371672	49.5369
rs71422795	0.0258293	0.00464016	30.9856
rs7147775	0.0177025	0.00186059	90.5249
rs71569053	0.0908314	0.00904383	100.871
rs7157892	0.0117672	0.00190111	38.3117
rs7167692	0.046048	0.00416742	122.092
rs7170637	0.0179731	0.00252759	50.563
rs7175531	0.0324797	0.00194669	278.375
rs7176579	0.0155106	0.00185937	69.5866
rs7186061	0.0167141	0.00258808	41.7072
rs7197197	0.015231	0.00188965	64.9672
rs7198032	0.0147857	0.00190251	60.399
rs7213463	0.0163091	0.0022588	52.132
rs7215205	0.0201275	0.001925	109.325
rs722470	0.0270798	0.00269608	100.885
rs7249860	0.101212	0.00322006	987.953
rs72640504	0.112321	0.00926334	147.023
rs72644599	0.032195	0.00515814	38.9575
rs726830	0.0124684	0.00192268	42.054
rs72692842	0.0287011	0.00314748	83.1517
rs72693601	0.0103661	0.00201691	26.4154
rs7270518	0.0357861	0.00425488	70.7382
rs7270565	0.0289615	0.00441676	42.9966
rs72706669	0.0466089	0.0075008	38.612
rs72741014	0.0137326	0.00233902	34.4697
rs72749676	0.0192096	0.00233869	67.467
rs72751424	0.0332182	0.00461625	51.7814
rs72755517	0.0248792	0.00278917	79.5651
rs72789124	0.0781477	0.0079464	96.7145
rs72795435	0.046665	0.00651758	51.2637
rs72796387	0.042276	0.00699202	36.558
rs72805220	0.0593166	0.00373054	252.819
rs72806656	0.0681874	0.00732275	86.7081
rs72808625	0.0572222	0.00832581	47.2363
rs72813180	0.0158831	0.00257143	38.1523
rs72826304	0.0352685	0.0048731	52.3797
rs72832241	0.0186773	0.00215183	75.3377
rs72832704	0.0297052	0.00495311	35.9674
rs72840032	0.0286186	0.00447743	40.8544
rs72860617	0.0364745	0.00508405	51.4706
rs72867095	0.0207234	0.00285475	52.697
rs72868849	0.0498692	0.00362402	189.358
rs7290979	0.0244795	0.00205733	141.578
rs72925179	0.0145854	0.00236239	38.1183
rs72945685	0.023181	0.00290996	63.4586
rs72957883	0.0620333	0.00826177	56.3772
rs72966926	0.0158148	0.00275947	32.8455
rs73036519	0.0122813	0.00203486	36.4267
rs73082474	0.0456626	0.00643109	50.4141
rs73126901	0.0523033	0.00491376	113.3
rs73156468	0.0177474	0.00267187	44.1203
rs7317781	0.0149223	0.00199273	56.0757
rs73211813	0.0258143	0.0025963	98.8578
rs73212812	0.0483276	0.00536368	81.1829
rs73217386	0.0761594	0.00701672	117.809
rs73219307	0.0581594	0.00540653	115.718
rs73238169	0.0192255	0.00271286	50.2228
rs73243402	0.0117091	0.00207	31.9968
rs7324365	0.0216941	0.00232868	86.7888
rs7331304	0.0392856	0.00421773	86.7579
rs7337108	0.0384234	0.00412657	86.6988
rs73400425	0.0312217	0.00440795	50.1695
rs73441953	0.0279758	0.00482657	33.596
rs73479996	0.0224681	0.00361381	38.6547
rs7386	0.012067	0.00185938	42.1175
rs7387462	0.0312331	0.00449495	48.2815
rs73882106	0.0177637	0.00333179	28.4257
rs74119759	0.0288327	0.00253973	128.883
rs74331022	0.018714	0.00255454	53.6671
rs74394067	0.101457	0.00581071	304.864
rs7444282	0.0196164	0.00229093	73.3187
rs745976	0.0173891	0.00192626	81.4938
rs74667391	0.0194082	0.00303659	40.8506
rs747091	0.0127451	0.00186306	46.7986
rs7477105	0.0183331	0.00197038	86.5709
rs74860610	0.0321898	0.0045645	49.7336
rs7488974	0.0510753	0.00188744	732.277
rs74901184	0.0467521	0.00690364	45.8613
rs74910854	0.0241356	0.0036048	44.8285
rs74998289	0.024059	0.00223775	115.593
rs75031626	0.0257228	0.00247007	108.447
rs7504492	0.0129557	0.00191968	45.5475
rs7508605	0.0137616	0.00229125	36.0739
rs7514962	0.0168562	0.00193438	75.9339
rs75230517	0.100591	0.00418287	578.322
rs7527300	0.0250301	0.00186936	179.283
rs75374818	0.0158718	0.00266855	35.3754
rs7546500	0.0154962	0.00195276	62.9728
rs7547770	0.0105208	0.00195577	28.9376
rs75505823	0.0207747	0.0036444	32.4951
rs7550790	0.0105178	0.00186928	31.6593
rs75549130	0.0459433	0.00673057	46.5951
rs75587692	0.0566267	0.00787833	51.6624
rs757286	0.0118112	0.00204524	33.3503
rs75728872	0.0732033	0.0087877	69.3922
rs7577569	0.0134969	0.00197092	46.8954
rs7578166	0.0127153	0.00187641	45.9196
rs757980	0.0355894	0.00213263	278.49
rs7593635	0.0504056	0.00536455	88.2858
rs759404	0.0177094	0.00370062	22.9012
rs7600828	0.0132867	0.0018896	49.4418
rs76042375	0.127014	0.00433053	860.243
rs76164234	0.0325284	0.00502897	41.8377
rs76287541	0.0167801	0.00237375	49.9711
rs7633119	0.0143307	0.00195843	53.545
rs764263	0.0176086	0.0020146	76.3962
rs76504223	0.0211886	0.00326759	42.0484
rs7653133	0.0104027	0.00191904	29.3849
rs765534	0.0193995	0.00305586	40.3008
rs76594667	0.0357663	0.00434796	67.667
rs76768932	0.0402894	0.00514537	61.3124
rs76858784	0.0132963	0.00233248	32.4957
rs76895963	0.0772182	0.00711971	117.629
rs76973696	0.0390564	0.00538858	52.5334
rs76983269	0.0598377	0.00557721	115.111
rs76983463	0.0402361	0.00467911	73.9444
rs76990766	0.0438194	0.00410779	113.793
rs77012621	0.051737	0.00778434	44.1732
rs7703857	0.0173014	0.00188588	84.1656
rs77116376	0.0450609	0.00724735	38.6582
rs77216612	0.0137488	0.0020419	45.3378
rs77249084	0.0127006	0.00208813	36.9942
rs7732092	0.010959	0.00186351	34.5843
rs77338655	0.0542945	0.00435931	155.123
rs77431781	0.0251243	0.00357496	49.3907
rs77553148	0.0224147	0.0032283	48.2079
rs77605527	0.0283687	0.00456967	38.5398
rs7762532	0.0167566	0.00230634	52.7868
rs77718124	0.0471496	0.00406333	134.645
rs77748419	0.0396348	0.00663997	35.6304
rs77763285	0.0485454	0.00749612	41.9395
rs7781279	0.0157598	0.00212121	55.1994
rs7781370	0.0452516	0.00192758	551.116
rs77823119	0.0411207	0.00332676	152.784
rs7782648	0.0784886	0.00509605	237.217
rs77897572	0.0620271	0.00913027	46.1526
rs78015143	0.0275677	0.00310543	78.8057
rs7814941	0.0208641	0.00230546	81.9
rs78150433	0.0435601	0.00590071	54.4966
rs78154385	0.0241541	0.00211546	130.368
rs78182250	0.030163	0.00474639	40.3852
rs78209469	0.0421574	0.00349482	145.512
rs78217843	0.0373676	0.00495448	56.8845
rs7830123	0.0306603	0.00211439	210.273
rs7834323	0.0181066	0.00203927	78.836
rs78432519	0.0362448	0.00288679	157.638
rs785836	0.012354	0.00194469	40.3566
rs7866211	0.0245864	0.0020281	146.964
rs7871955	0.0126409	0.00201366	39.4079
rs78733883	0.0300211	0.00423179	50.3275
rs78821115	0.0545094	0.00638342	72.9182
rs78832434	0.0427641	0.00489874	76.2061
rs7893940	0.0189596	0.00196097	93.4795
rs79158536	0.0388319	0.0034692	125.291
rs79270125	0.0246155	0.00514498	22.8902
rs7931899	0.0118111	0.00184676	40.9034
rs7936013	0.0193661	0.00235305	67.7364
rs79364962	0.066941	0.0035374	358.11
rs79414850	0.0125871	0.0021861	33.1521
rs79426062	0.0378791	0.00532966	50.5127
rs79429259	0.0354836	0.00523051	46.0222
rs7949048	0.0134224	0.00191648	49.0514
rs79555106	0.0227975	0.00344291	43.8453
rs7959604	0.0594083	0.00351663	285.391
rs79663242	0.0262369	0.00484149	29.3675
rs79730006	0.044296	0.00704325	39.5533
rs7981875	0.0259837	0.00318847	66.4106
rs79905819	0.0484689	0.00386691	157.108
rs8002850	0.0286644	0.00196487	212.823
rs8008406	0.0167854	0.00211219	63.1535
rs8016556	0.0131552	0.0019589	45.0994
rs8022116	0.0210648	0.0030894	46.4907
rs80306758	0.0220566	0.003474	40.3104
rs80349854	0.0249306	0.00435691	32.7422
rs8066620	0.0176549	0.00200099	77.8468
rs8068234	0.0679214	0.00736047	85.1534
rs8071429	0.019464	0.00191192	103.639
rs8074454	0.011932	0.00196903	36.7216
rs8081240	0.0150454	0.00186234	65.2664
rs8085004	0.0163736	0.00258451	40.1358
rs8091180	0.0138005	0.00187148	54.3775
rs8095921	0.0158789	0.00223855	50.3161
rs8106862	0.0188485	0.00306672	37.7751
rs8118759	0.0137514	0.00206704	44.2584
rs8121146	0.0112997	0.00186818	36.5844
rs8132316	0.0307139	0.00443356	47.9915
rs8134775	0.0266913	0.00233129	131.083
rs8137232	0.0209103	0.00278488	56.3777
rs825453	0.0164877	0.00189518	75.6866
rs840886	0.0107439	0.00186686	33.1208
rs845340	0.0254703	0.00359529	50.188
rs847147	0.0173385	0.00208929	68.8693
rs851320	0.0137959	0.00220576	39.1186
rs853180	0.0116062	0.00190004	37.3125
rs87	0.036979	0.00229407	259.835
rs884205	0.0259088	0.00214851	145.419
rs899631	0.0183832	0.0018979	93.82
rs913257	0.0116717	0.00183498	40.4581
rs914653	0.0120162	0.00195603	37.7384
rs917441	0.0291453	0.00190483	234.113
rs929043	0.0406659	0.00484923	70.3259
rs9296151	0.0384198	0.0049915	59.2445
rs9299597	0.0361525	0.0025883	195.096
rs9310995	0.0157942	0.00185634	72.3903
rs9322026	0.0141555	0.0025931	29.7997
rs9332407	0.0131404	0.00184905	50.5033
rs9357008	0.0177396	0.00223408	63.0507
rs9364386	0.0266947	0.00240198	123.513
rs9370388	0.0126188	0.00191927	43.2279
rs9375702	0.0228151	0.00197948	132.844
rs9376164	0.0302878	0.00268286	127.45
rs9378485	0.0141876	0.00188331	56.7511
rs9379084	0.0354806	0.00294872	144.782
rs939666	0.0710745	0.00227297	977.778
rs9416818	0.0150557	0.00254394	35.0258
rs9426772	0.0135376	0.00183726	54.2928
rs9447030	0.0233667	0.00183308	162.492
rs945508	0.010975	0.00183508	35.7684
rs9466056	0.012252	0.00188162	42.3985
rs947091	0.0403792	0.00185128	475.742
rs9475402	0.0252319	0.00294128	73.5914
rs9482773	0.0785712	0.0018335	1836.39
rs9483215	0.0132654	0.00188638	49.4518
rs949782	0.0261692	0.00200458	170.425
rs9509989	0.01934	0.00286135	45.6847
rs9513510	0.035268	0.0020194	305.012
rs9530279	0.0185815	0.00210666	77.7988
rs954	0.0198567	0.00204171	94.5858
rs9561331	0.0208196	0.00275079	57.2835
rs957772	0.0122597	0.00187352	42.8196
rs9594669	0.014634	0.00226067	41.9036
rs9594738	0.0476665	0.00185382	661.137
rs9606139	0.11533	0.00304573	1433.84
rs9610884	0.0176629	0.00221265	63.7233
rs9681270	0.0126163	0.00186269	45.8757
rs9682464	0.0157135	0.00228727	47.1966
rs9813107	0.0238121	0.00279448	72.6095
rs9873544	0.0149911	0.00190221	62.1084
rs9893168	0.0127765	0.00185821	47.2753
rs9909922	0.025538	0.00298034	73.4247
rs9921192	0.0127905	0.00186781	46.8932
rs9921222	0.0256994	0.00185555	191.823
rs9923395	0.0139634	0.00222075	39.5351
rs9924526	0.0163848	0.00216561	57.2429
rs9927137	0.0123964	0.00186119	44.3619
rs9932220	0.0338752	0.00224569	227.543
rs9933456	0.0199312	0.00211369	88.9169
rs9952412	0.0186444	0.0018707	99.3319
rs9972653	0.0196711	0.00189378	107.894
rs9976876	0.0189311	0.00186867	102.633
rs9983174	0.0114008	0.00186945	37.1914
rs9992100	0.0538889	0.00753432	51.1576
rs9994946	0.0236414	0.00325979	52.5977

## Sheet: Table S4i
Supplementary Table S4i. Weighted median Mendelian randomisation results for reverse MR of GDF15 with cardiometabolic traits.
	Instruments	Estimate (SE)	P-valueFDR (raw)
BMI	1011	0.11 (0.051)	0.031
WHR	588	0.025 (0.063)	0.69
Diabetes	278	-0.018 (0.025)	0.49
Glucose	77	-0.053 (0.086)	0.54
HDL	483	0.051 (0.11)	0.63
eBMD	1113	0.0089 (0.030)	0.77

## Sheet: Table S4j
Supplementary Table S4j. GDF15 protein-truncating variant carrier frequency in UKB.
Mutation	Variant	Total Freq	EUR Freq	AFR Freq	SAS Freq
A189-R190 frameshift	19-18388575-CA-C	0.5	0.55	0	0.13
Q187 stop gained	19-18388567-C-T	0.06	0.02	0	0.75
L30-S31 frameshift	19-18386279-GTC-G	0.05	0.05	0	0
S36 frameshift	19-18386297-C-CCCGGGACCCT	0.05	0	1	0
V93 splice donor	19-18386468-T-C	0.04	0.04	0	0
H26 frameshift	19-18386267-T-TG	0.04	0.04	0	0
M1 start lost	19-18386192-G-T	0.01	0.01	0	0
S44 stop gained	19-18386320-C-A	0.01	0.01	0	0
R54 stop gained	19-18386349-C-T	0.01	0	0	0.13
K58 stop gained	19-18386361-A-T	0.03	0.03	0	0
Y60 stop gained	19-18386369-C-G	0.01	0.01	0	0
E74 stop gained	19-18386409-G-T	0.01	0.01	0	0
V93 splice acceptor	19-18388285-G-A	0.01	0.01	0	0
W135 stop gained	19-18388412-G-A	0.01	0	0	0.13
W225 stop gained	19-18388683-G-A	0.01	0.01	0	0
W228 stop gained	19-18388691-G-A	0.01	0.01	0	0
S231 stop gained	19-18388700-C-A	0.01	0.01	0	0
Q266 stop gained	19-18388864-C-T	0.01	0.01	0	0
A33 frameshift	19-18386287-C-CTCGCATG	0.01	0.01	0	0
S44 frameshift	19-18386320-C-CAGAA	0.01	0.01	0	0
S76-T78 frameshift	19-18386415-TCGAACAC-T	0.01	0.01	0	0
I88-L89 frameshift	19-18386452-TACTC-T	0.03	0.03	0	0
R149-F150 frameshift	19-18388455-AC-A	0.03	0.03	0	0
G191-A195 frameshift	19-18388580-GGCGCCGCAGA-G	0.02	0.02	0	0
D201-P204 frameshift	19-18388610-ACCACTGT-A	0.01	0.01	0	0
H202-C203 frameshift	19-18388614-CT-C	0.01	0.01	0	0
C210-C211 frameshift	19-18388638-CT-C	0.02	0.02	0	0
T290-T290 frameshift	19-18388876-ACC-A	0.01	0.01	0	0
